# Supplementary material for: Solid-state red fluorescence of intramolecularly ring-fused donor–π–acceptor-type fluorinated diphenylacetylenes achieved by enhancing intramolecular charge transfer properties
Source: Royal Society of Chemistry journal article supplement (doi:10.1039/d4tc02957g), 2024-11-18
Supplement: d4tc02957g1.pdf [file d4tc02957g1.pdf]

## *Electronic Supplementary Information*

### **Solid-state red fluorescence of intramolecular ring-fused donor- $\pi$ -acceptor-type fluorinated diphenylacetylenes achieved by enhancing intramolecular charge transfer properties**

Kazuki Kobayashi, Shigeyuki Yamada,\* Masato Morita, Tsuneaki Sakurai,  
Motohiro Yasui, and Tsutomu Konno

Faculty of Molecular Chemistry and Engineering, Kyoto Institute of Technology,  
Matsugasaki, Sakyo-ku, Kyoto 606-8585, Japan

\*Correspondence: [syamada@kit.ac.jp](mailto:syamada@kit.ac.jp); Tel: +81-75-724-7517

| Table of Contents:           |           |      |
|------------------------------|-----------|------|
| NMR Spectra                  | ••••••••  | S-2  |
| Crystallographic analysis    | ••••••••  | S-12 |
| DFT Calculation              | ••••••••  | S-13 |
| Cartesian coordinate         | ••••••••  | S-14 |
| Photophysical Characteristic |           |      |
| In solution                  | ••••••••  | S-38 |
| In PMMA film                 | ••••~•••• | S-43 |
| In crystalline state         | ••••~•••• | S-44 |
| PXRD pattern                 | ••••~•••• | S-46 |
| TGA and DSC curves           | ••••~•••• | S-46 |
| References                   | ••••~•••• | S-47 |

## Experimental

### General

A Bruker AVANCE III 400 NMR spectrometer ( $^1\text{H}$ : 400 MHz and  $^{13}\text{C}$ : 100 MHz) was used for recording  $^1\text{H}$  and  $^{13}\text{C}$  NMR spectra in chloroform-*d* ( $\text{CDCl}_3$ ) solutions, and chemical shifts were reported in parts per million (ppm) using residual protons in the NMR solvent. The Bruker AVANCE III 400 NMR spectrometer was used for recording  $^{19}\text{F}$  NMR (376 MHz) spectra in  $\text{CDCl}_3$  solutions with  $\text{CFCl}_3$  ( $\delta_{\text{F}} = 0.0$  ppm) or hexafluorobenzene ( $\delta_{\text{F}} = -163$  ppm) as the internal standard. IR spectra were recorded using the KBr method with a JASCO FT/IR-4100 type spectrometer; all spectra are reported in wavenumbers ( $\text{cm}^{-1}$ ). HRMS data were recorded by a JEOL JMS-700MS spectrometer using the fast atom bombardment method. Dried glassware and a magnetic stirrer were used for all reactions. Reagent-grade chemicals were used after purification in the usual manner. Silica gel (Wakogel<sup>®</sup> 60N, 38-100  $\mu\text{m}$ ) was used for column chromatography and silica gel TLC plates (Merck, Silica gel 60F<sub>254</sub>) were used for TLC analysis.

### Synthesis of IndCBZ-F through nucleophilic aromatic substitution

2-Ethynylindolo[3,2,1-*jk*]carbazole (0.3 g, 1.1 mmol) was placed in a two-necked round bottomed flask containing THF (11 mL). The flask was equipped with a Teflon<sup>®</sup>-coated stirring bar and cooled to 0 °C. Subsequently, a solution of *n*-BuLi (1.6 mol L<sup>-1</sup> hexane solution, 0.70 mL, 1.1 mmol) was slowly added to the mixture. After stirring for 30 min, pentafluorobenzonitrile (1.57 g/mL, 0.21 mL, 1.7 mmol) was gradually added to the mixture. Subsequently, after stirring for 1 h, the reaction mixture was heated to room temperature, stirred for 18 h, and poured into a saturated  $\text{NH}_4\text{Cl}$  solution. The crude product was extracted with EtOAc (thrice) and the combined organic layer was washed with brine (once). The organic layer was subsequently dried over anhydrous  $\text{Na}_2\text{SO}_4$  and separated via filtration. The filtrate was evaporated in vacuo and purified by silica-gel column chromatography (hexane/ $\text{CH}_2\text{Cl}_2 = 1/1$ ) to generate the corresponding product **IndCBZ-F** (0.053 g, 0.12 mmol) in 11% isolated yield as a yellow solid. Further recrystallization from  $\text{CH}_2\text{Cl}_2$ /hexane produced yellow crystals that were sufficiently pure for photophysical analysis.

### 2-[2-(4-Cyano-2,3,5,6-tetrafluorophenyl)ethyn-1-yl]indro[3,2,1-*jk*]carbazole (IndCBZ-F)

Yield: 11% (yellow solid); M.p.: 272.0–273.9 °C;  $^1\text{H}$  NMR ( $\text{CDCl}_3$ ):  $\delta$  8.32 (s, 2H), 8.15 (d,  $J = 7.5$  Hz, 2H), 7.93 (d,  $J = 8.1$  Hz, 2H), 7.62 (td,  $J = 7.8, 1.1$  Hz, 2H), 7.41 (td,  $J = 7.8, 1.1$  Hz, 2H); The  $^{13}\text{C}$  NMR spectrum was not obtained due to extremely low solubility in the common deuterated NMR solvents;  $^{19}\text{F}$  NMR ( $\text{CDCl}_3$ ):  $\delta$  -134.25 (m, ArF), -135.31 (m, ArF); IR (KBr):  $\nu$  3058, 2373, 2348, 2245, 2211, 1644, 1589, 1489, 1452, 1360, 1163, 1139, 1094, 1037  $\text{cm}^{-1}$ ; HRMS: (FAB+)  $m/z$  [ $\text{M}$ ]<sup>+</sup> calcd for  $\text{C}_{27}\text{H}_{10}\text{F}_4\text{N}_2$ : 438.0780; found: 438.0777.

### 4-[2-(4-Cyano-2,3,5,6-tetrafluorophenyl)ethyn-1-yl]julolidine (JLD-F)

Yield: 13% (orange solid); M.p.: 197.6–199.9 °C;  $^1\text{H}$  NMR ( $\text{CDCl}_3$ ):  $\delta$  7.02 (s, 2H), 3.25 (t,  $J = 5.7$  Hz, 4H), 2.73 (t,  $J = 7.1$  Hz, 4H), 1.97 (quin,  $J = 6.1$  Hz, 4H);  $^{13}\text{C}$  NMR ( $\text{CDCl}_3$ ):  $\delta$  145.9–148.5 (dm,  $J = 259.3$  Hz), 148.3–145.7 (dm,  $J = 259.0$  Hz), 144.7, 131.2, 120.9, 111.3, 108.0, 107.9, 105.2, 91.0, 73.0, 49.9, 27.5, 21.4;  $^{19}\text{F}$  NMR ( $\text{CDCl}_3$ ):  $\delta$  -135.17 (ddd,  $J = 25.0, 16.4, 5.7$  Hz, 2F), -134.90 (ddd,  $J = 24.8, 16.2, 5.8$  Hz, 2F); IR (KBr):  $\nu$  3435, 2941, 2847, 2200, 1598, 1521, 1491, 1335, 1312, 1098, 984  $\text{cm}^{-1}$ ; HRMS: (FAB+)  $m/z$  [ $\text{M}$ ]<sup>+</sup> calcd for  $\text{C}_{21}\text{H}_{14}\text{F}_4\text{N}_2$ : 370.1093; found: 370.1104.

### 9-[2-(4-Cyano-2,3,5,6-tetrafluorophenyl)ethyn-1-yl]-1,1,7,7-tetramethyljulolidine (TMeJLD-F)

Yield: 41% (orange solid); M.p.: 242.1–243.3 °C; <sup>1</sup>H NMR (CDCl<sub>3</sub>): δ 7.25 (s, 2H), 3.28 (t, *J* = 6.1 Hz, 4H), 1.74 (t, *J* = 6.1 Hz, 4H), 1.30 (s, 12H); <sup>13</sup>C NMR (CDCl<sub>3</sub>): δ 145.8–148.5 (dm, *J* = 264.0 Hz), 144.8–147.1 (dm, *J* = 234.7 Hz), 142.6, 130.2, 128.3, 112.1, 112.1, 108.1, 105.4, 78.2, 72.3, 53.6, 46.8, 35.9, 32.3, 30.5; <sup>19</sup>F NMR (CDCl<sub>3</sub>): δ –135.36 (m, 2F), –136.62 (m, 2F); IR (KBr): ν 2962, 2924, 2853, 2185, 1646, 1595, 1523, 1333, 1310, 1095, 984 cm<sup>-1</sup>; HRMS: (FAB+) *m/z* [M]<sup>+</sup> calcd for C<sub>25</sub>H<sub>22</sub>F<sub>4</sub>N<sub>2</sub>: 426.1719; found: 426.1723.

### Synthesis of IndCBZ-H through Pd(0)-catalyzed Sonogashira cross-coupling reaction

2-Ethynylindolo[3,2,1-*jk*]carbazole (0.27 g, 1.1 mmol), Cl<sub>2</sub>Pd(PPh<sub>3</sub>)<sub>2</sub> (0.036 g, 0.057 mmol), PPh<sub>3</sub> (0.13 g, 0.057 mmol), CuI (0.020 g, 0.11 mmol), and 4-bromobenzonitrile (0.26 g, 1.6 mmol) in Et<sub>3</sub>N (5.0 mL) were placed in a two-necked round-bottomed flask equipped with a Teflon<sup>®</sup>-coated stirring bar. The reaction mixture was stirred at 80 °C for 6 h; the precipitate formed during the reaction was separated by atmospheric filtration and the filtrate was poured into a saturated aqueous solution of NH<sub>4</sub>Cl. The crude product was extracted with EtOAc (thrice) and the combined organic layer was washed with brine (once). The organic layer was dried over anhydrous Na<sub>2</sub>SO<sub>4</sub> and separated via filtration. The filtrate was evaporated in vacuo and purified using silica-gel column chromatography (hexane/CH<sub>2</sub>Cl<sub>2</sub> = 2/5) to generate the corresponding product **IndCBZ-H** (0.17 g, 0.46 mmol) in 42% isolated yield as a white solid. Further recrystallization from CH<sub>2</sub>Cl<sub>2</sub>/hexane produced white crystals that were sufficiently pure for photophysical analysis.

### 2-[2-(4-Cyanophenyl)ethyn-1-yl]indro[3,2,1-*jk*]carbazole (IndCBZ-H)

Yield: 42% (white solid); M.p.: 240.1–241.6 °C; <sup>1</sup>H NMR (CDCl<sub>3</sub>): δ 8.23 (s, 2H), 8.11 (d, *J* = 8.0 Hz, 2H), 7.90 (d, *J* = 8.0 Hz, 2H), 7.65 (s, 4H), 7.58 (td, *J* = 7.8, 1.2 Hz, 2H), 7.38 (td, *J* = 7.6, 0.9 Hz, 2H); <sup>13</sup>C NMR (CDCl<sub>3</sub>): δ 143.6, 139.2, 132.1, 131.9, 129.4, 128.8, 127.5, 123.7, 123.4, 122.3, 118.7, 118.5, 116.5, 112.4, 111.0, 96.3, 86.1; IR (KBr): ν 3055, 2225, 2204, 1916, 1647, 1647, 1603, 1589, 1455, 1427, 1164, 1134, 1112, 1087, 1038, 1011 cm<sup>-1</sup>; HRMS: (FAB+) *m/z* [M]<sup>+</sup> calcd for C<sub>27</sub>H<sub>14</sub>N<sub>2</sub>: 366.1157; found: 366.1151.

### 4-[2-(4-Cyanophenyl)ethyn-1-yl]julolidine (JLD-H)

Yield: 34% (white solid); M.p.: 162.9–163.5 °C; <sup>1</sup>H NMR (CDCl<sub>3</sub>): δ 7.57 (d, *J* = 8.8 Hz, 2H), 7.50 (d, *J* = 8.8 Hz, 2H), 6.98 (s, 2H), 3.21 (t, *J* = 5.7 Hz, 4H), 2.72 (t, *J* = 6.4 Hz, 4H), 1.97 (quin, *J* = 6.1 Hz, 4H); <sup>13</sup>C NMR (CDCl<sub>3</sub>): δ 143.6, 131.9, 131.4, 130.6, 129.6, 121.0, 119.0, 109.9, 107.3, 96.6, 86.0, 49.9, 27.5, 21.6; IR (KBr): ν 3397, 3084, 2949, 2932, 2850, 2836, 2221. 2190, 1593, 1519, 1337, 1309, 1201, 1131, 974 cm<sup>-1</sup>; HRMS: (FAB+) *m/z* [M]<sup>+</sup> calcd for C<sub>21</sub>H<sub>18</sub>N<sub>2</sub>: 298.1470; found: 298.1468.

### 9-[2-(4-Cyanophenyl)ethyn-1-yl]-1,1,7,7-tetramethyljulolidine (TMeJLD-H)

Yield: 8% (white solid); M.p.: 192.2–193.4 °C; <sup>1</sup>H NMR (CDCl<sub>3</sub>): δ 7.61–7.53 (m, 4H), 7.21 (s, 2H), 3.23 (t, *J* = 6.1 Hz, 4H), 1.74 (t, *J* = 6.1 Hz, 4H); <sup>13</sup>C NMR (CDCl<sub>3</sub>): δ 141.3, 131.9, 131.4, 130.0, 129.6, 127.7, 119.0, 109.9, 107.1, 97.2, 85.7, 46.7, 36.2, 32.2, 30.7; IR (KBr): ν 3089, 3050, 2957, 2925, 2851, 2225, 2198 1671, 1595, 1507, 1456, 1330, 1309, 1159, 1020 cm<sup>-1</sup>; HRMS: (FAB+) *m/z* [M]<sup>+</sup> calcd for C<sub>25</sub>H<sub>26</sub>N<sub>2</sub>: 354.2096; found: 354.2100.

## NMR Spectra

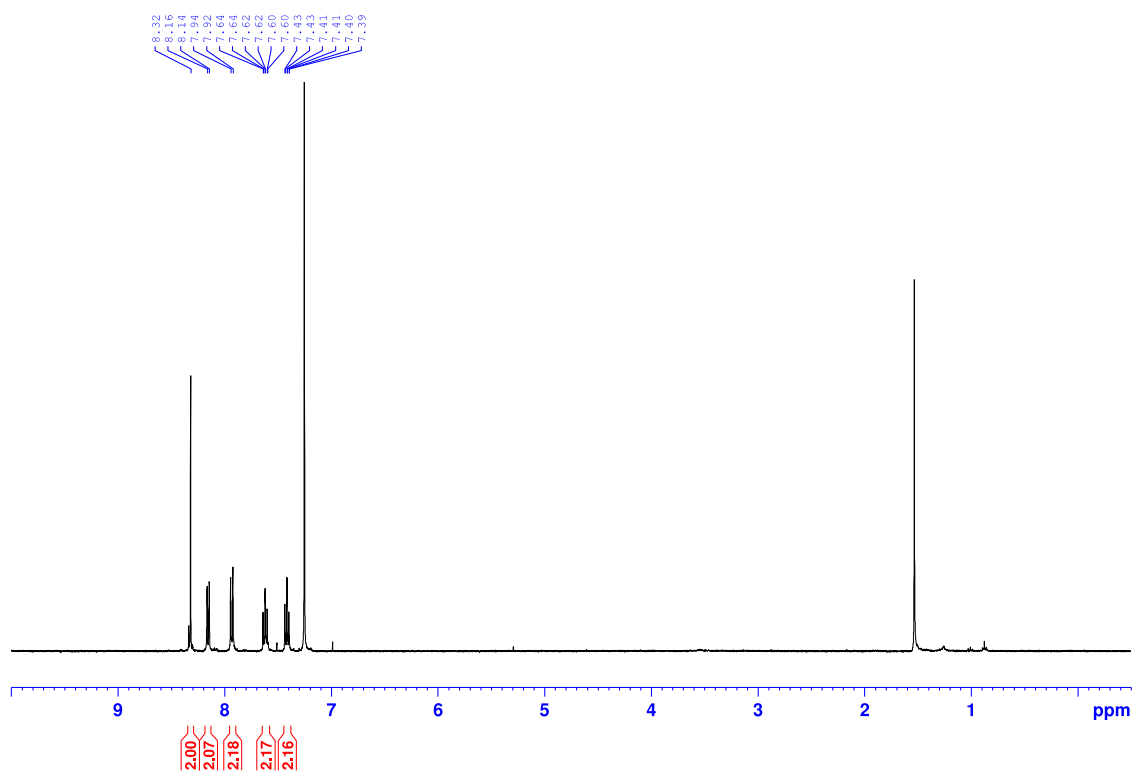

**Figure S1.** <sup>1</sup>H NMR spectrum of IndCBZ-F (400 MHz, CDCl<sub>3</sub>)

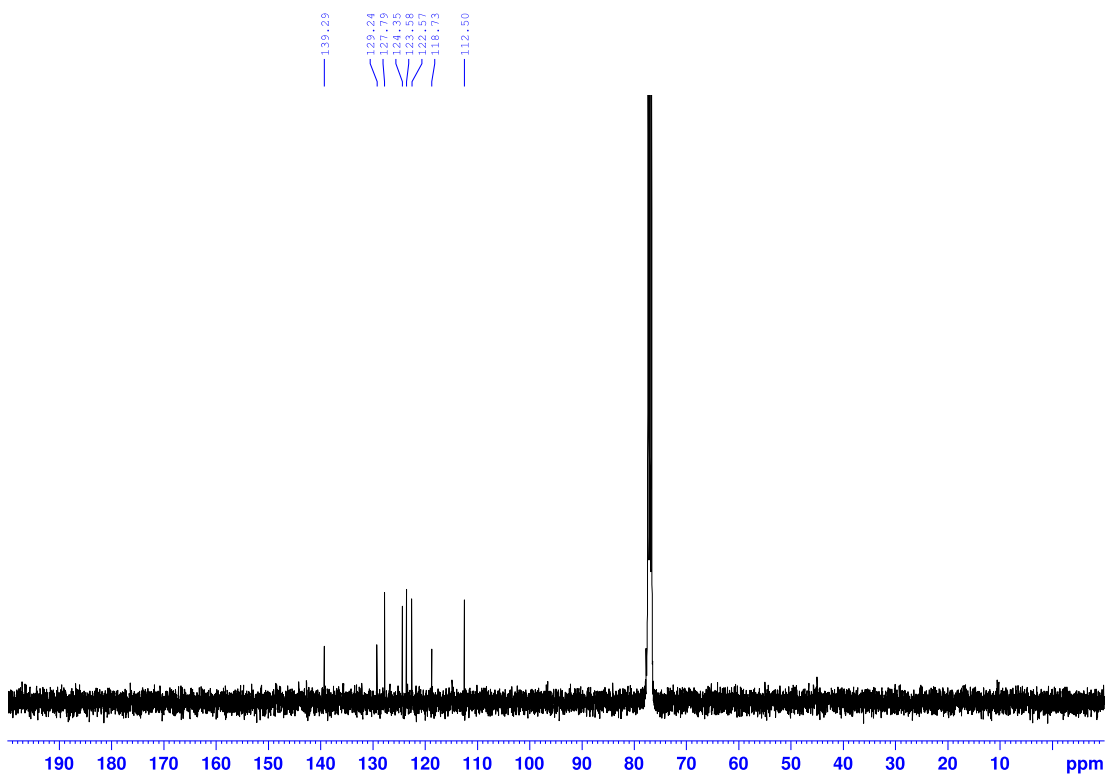

**Figure S2.** <sup>13</sup>C NMR spectrum of IndCBZ-F (100 MHz, CDCl<sub>3</sub>)

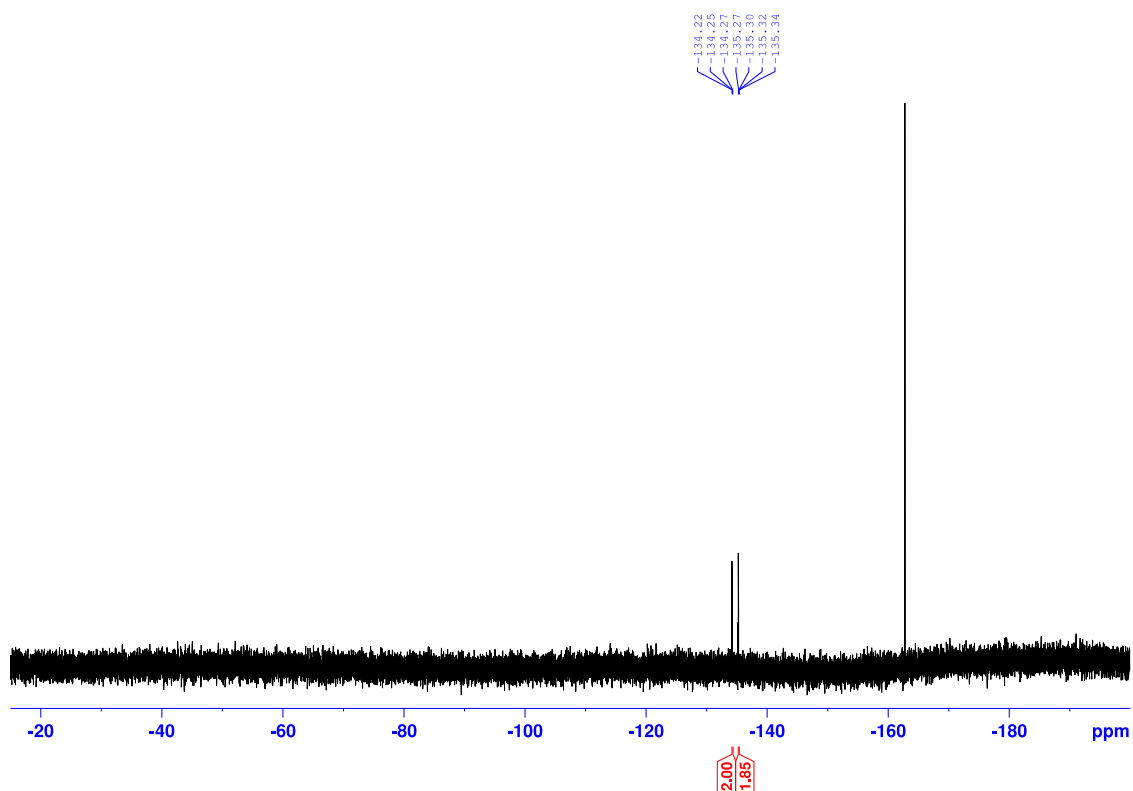

**Figure S3.**  $^{19}\text{F}$  NMR spectrum of **IndCBZ-F** (376 MHz,  $\text{CDCl}_3$ , hexafluoro benzene)

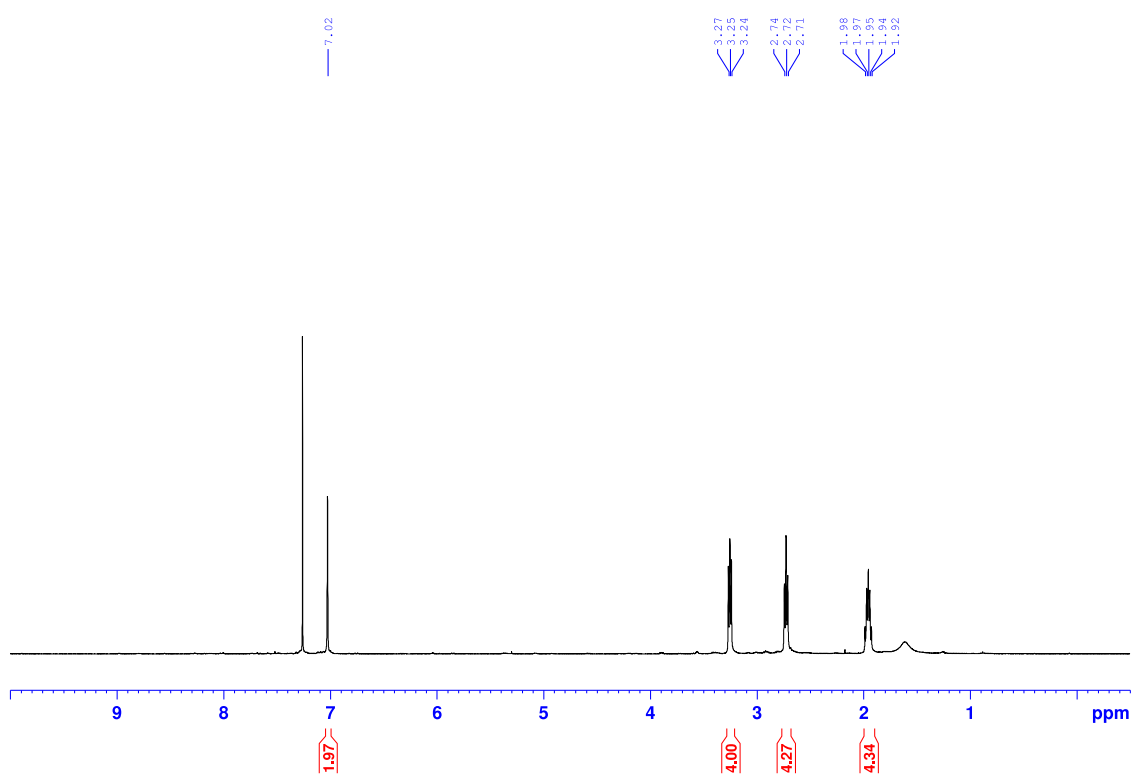

**Figure S4.**  $^1\text{H}$  NMR spectrum of **JLD-F** (400 MHz,  $\text{CDCl}_3$ )

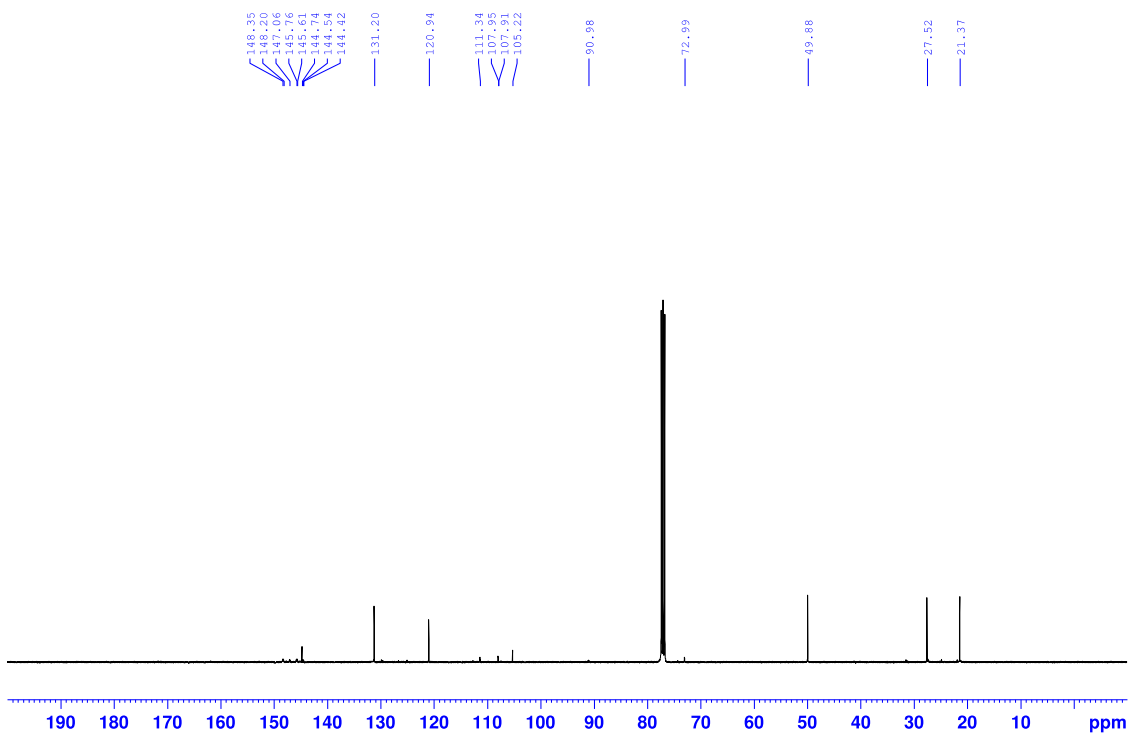

**Figure S5.**  $^{13}\text{C}$  NMR spectrum of **JLD-F** (100 MHz,  $\text{CDCl}_3$ )

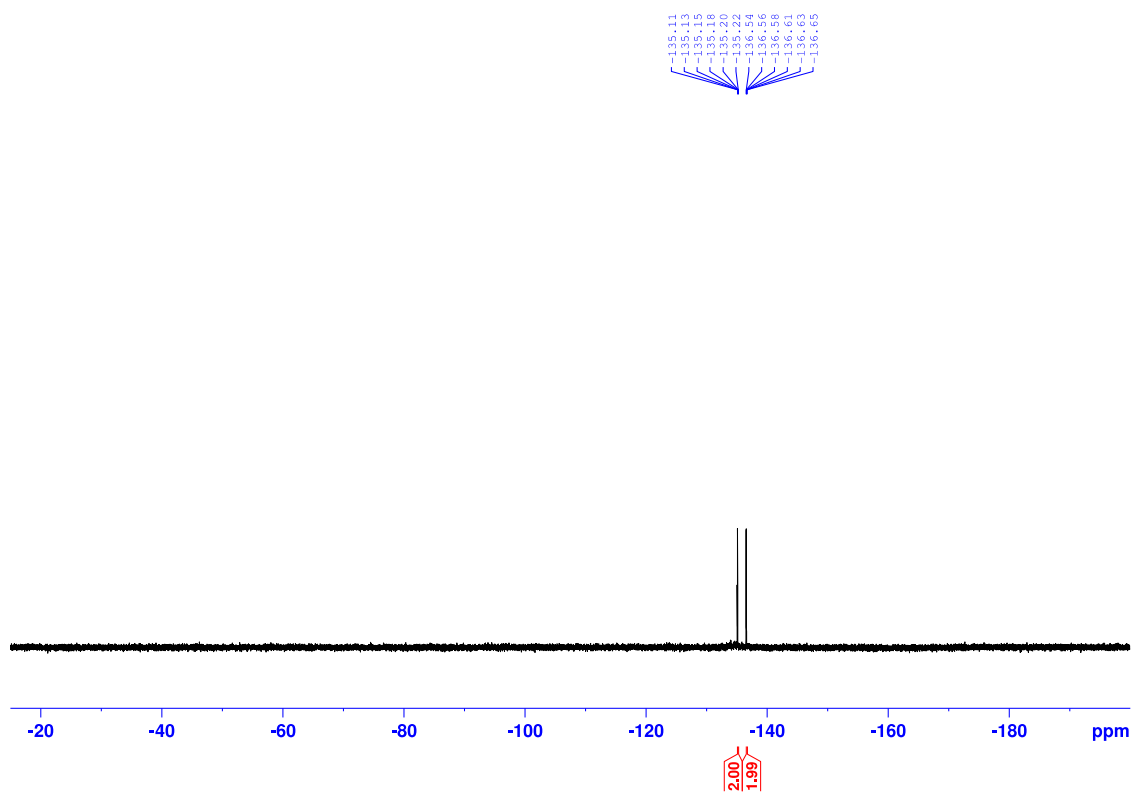

**Figure S6.**  $^{19}\text{F}$  NMR spectrum of **JLD-F** (376 MHz,  $\text{CDCl}_3$ , hexafluoro benzene)

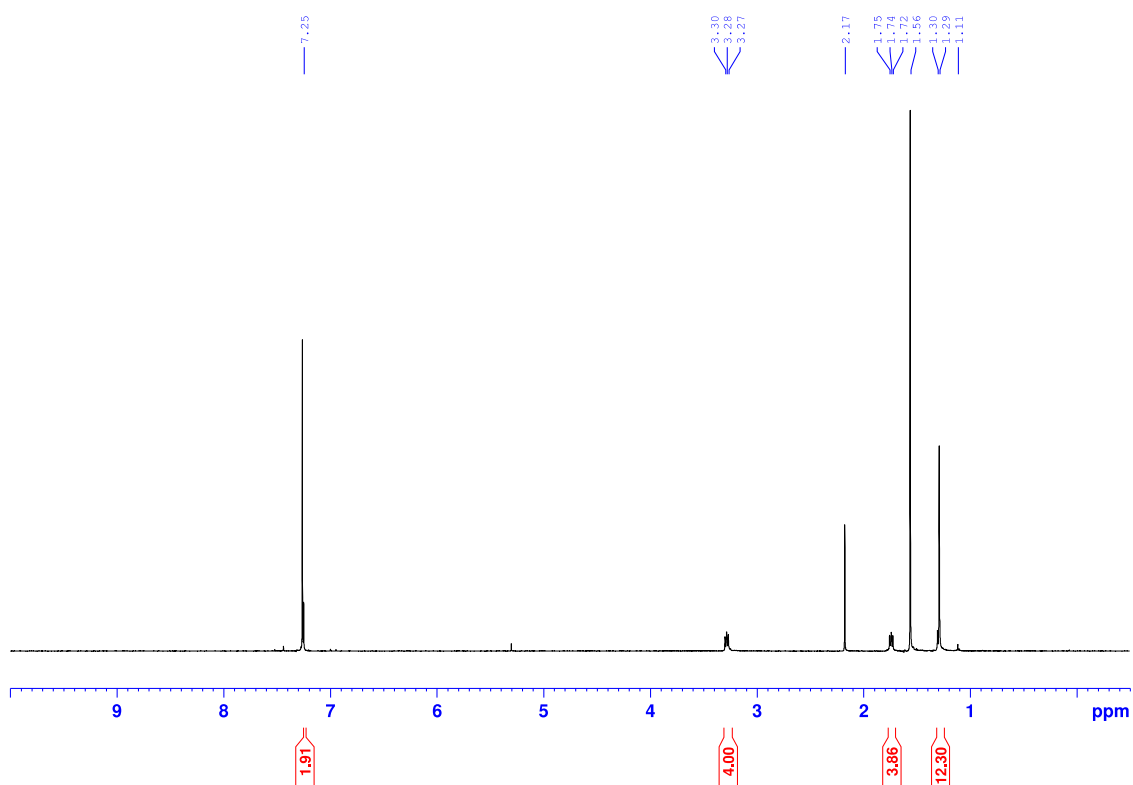

**Figure S7.**  $^1\text{H}$  NMR spectrum of TMeJLD-F (400 MHz,  $\text{CDCl}_3$ )

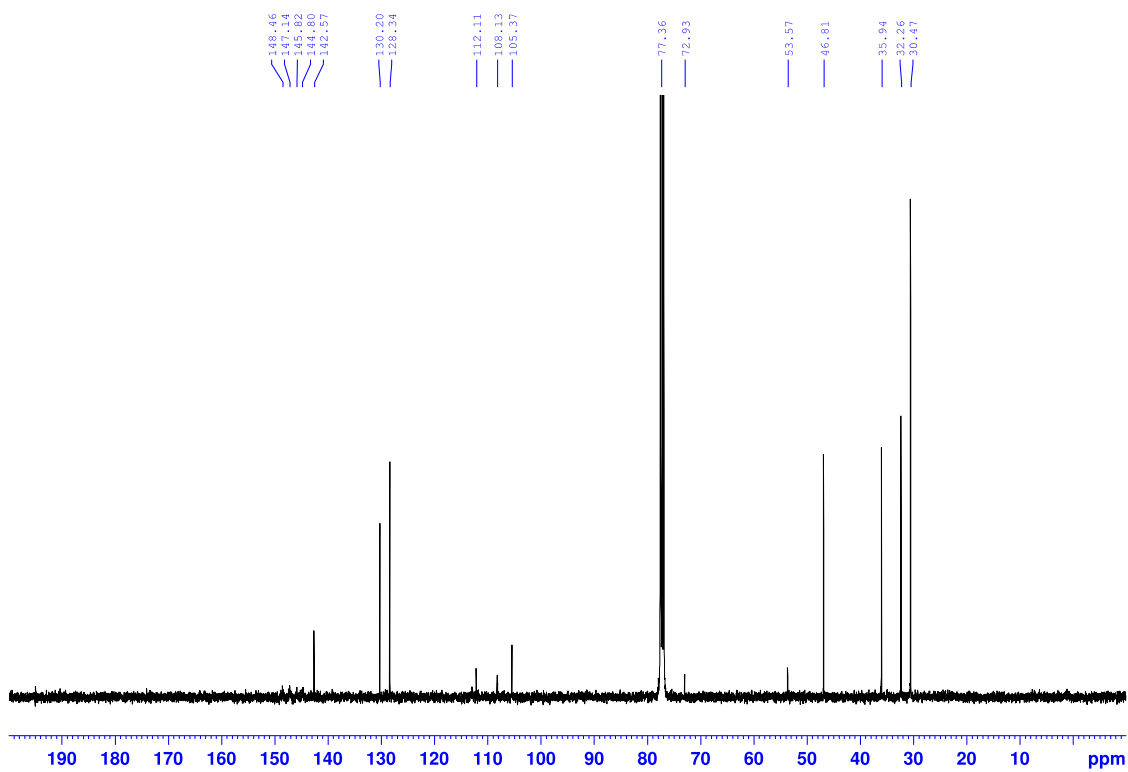

**Figure S8.**  $^{13}\text{C}$  NMR spectrum of TMeJLD-F (100 MHz,  $\text{CDCl}_3$ )

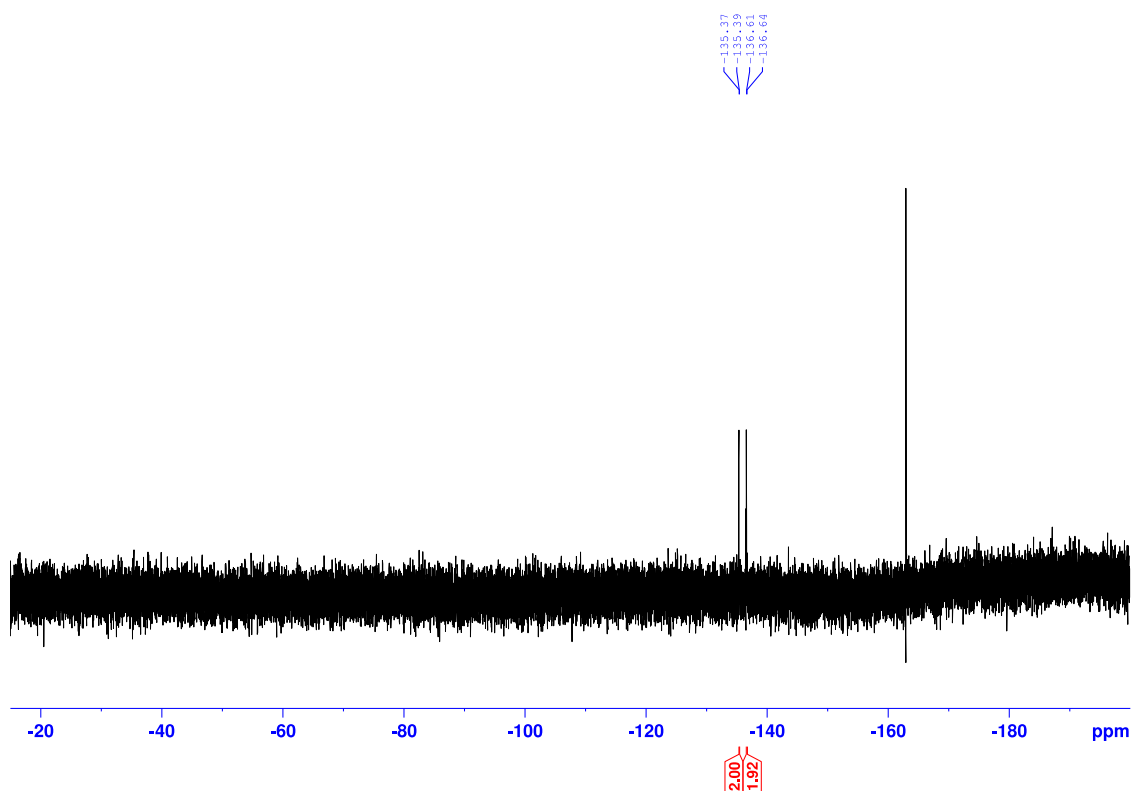

**Figure S9.**  $^{19}\text{F}$  NMR spectrum of **TMeJLD-F** (376 MHz,  $\text{CDCl}_3$ , hexafluoro benzene)

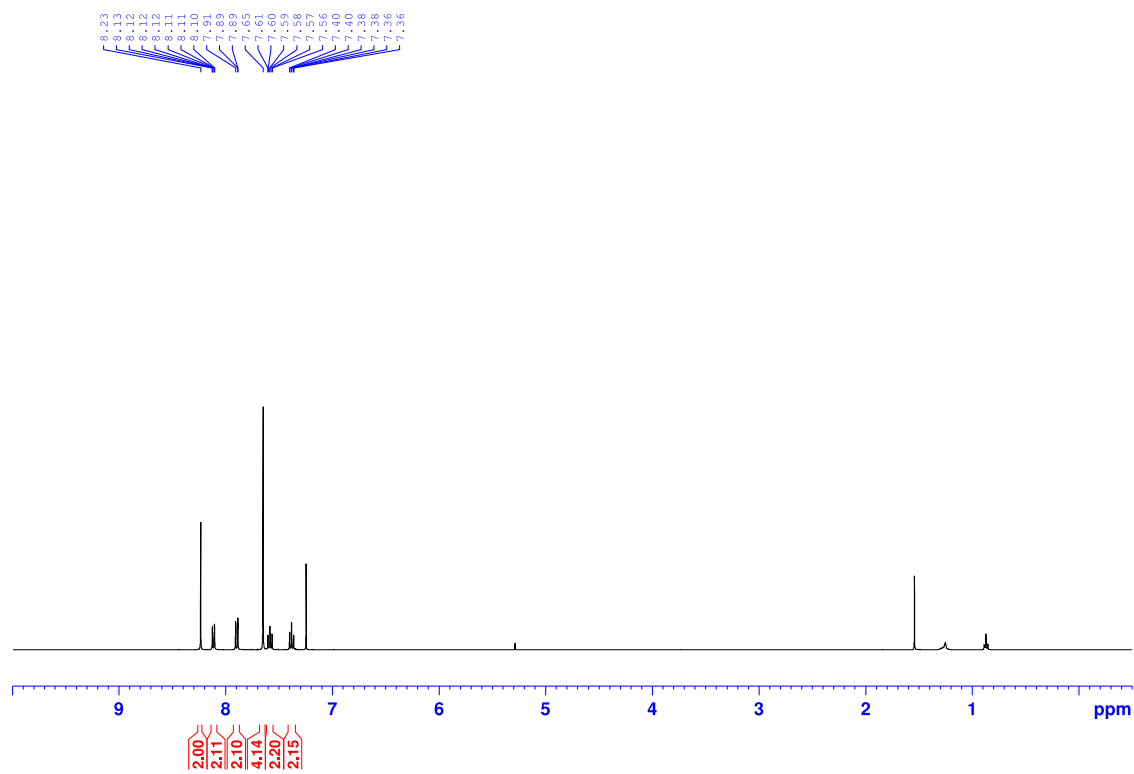

**Figure S10.**  $^1\text{H}$  NMR spectrum of **IndCBZ-H** (400 MHz,  $\text{CDCl}_3$ )



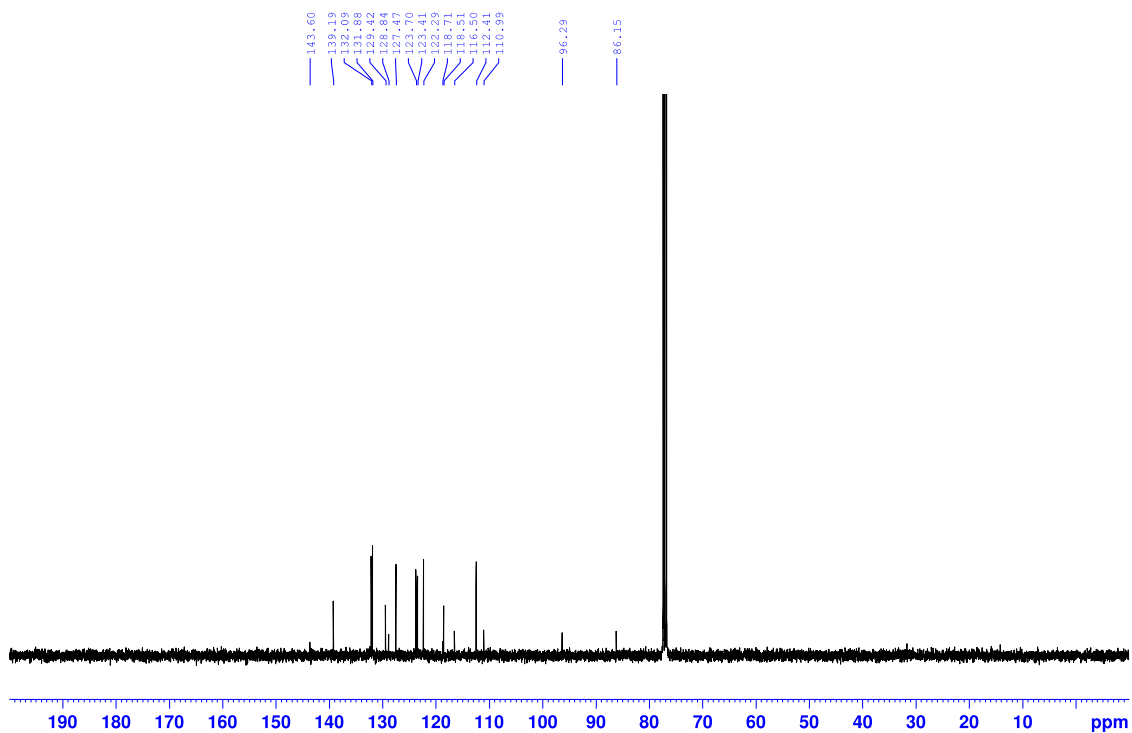

Figure S11.  $^{13}\text{C}$  NMR spectrum of **IndCBZ-H** (100 MHz,  $\text{CDCl}_3$ )

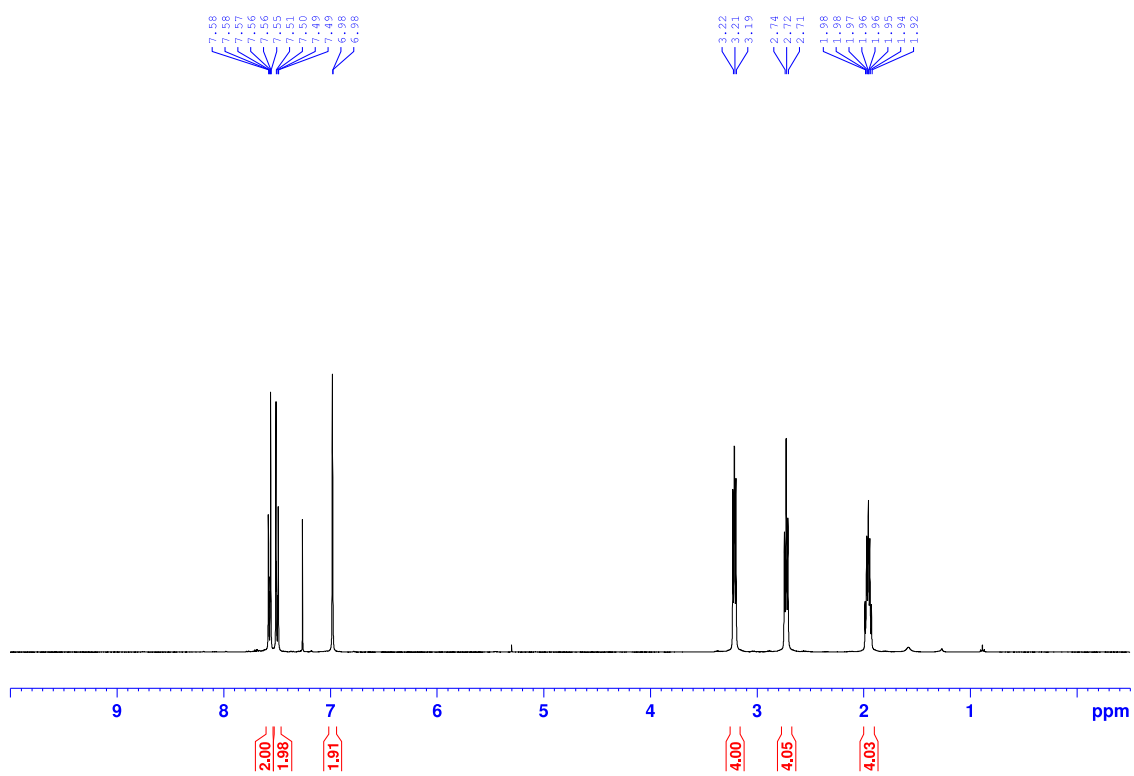

Figure S12.  $^1\text{H}$  NMR spectrum of **JLD-H** (400 MHz,  $\text{CDCl}_3$ )

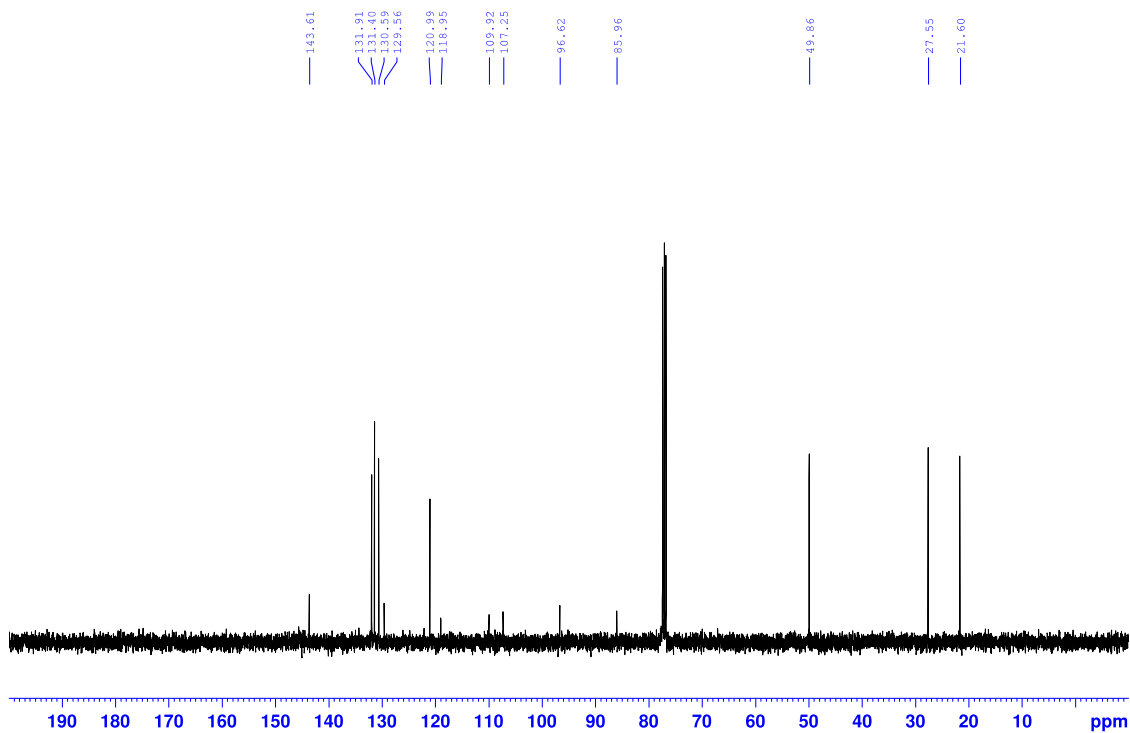

**Figure S13.**  $^{13}\text{C}$  NMR spectrum of **JLD-H** (100 MHz,  $\text{CDCl}_3$ )

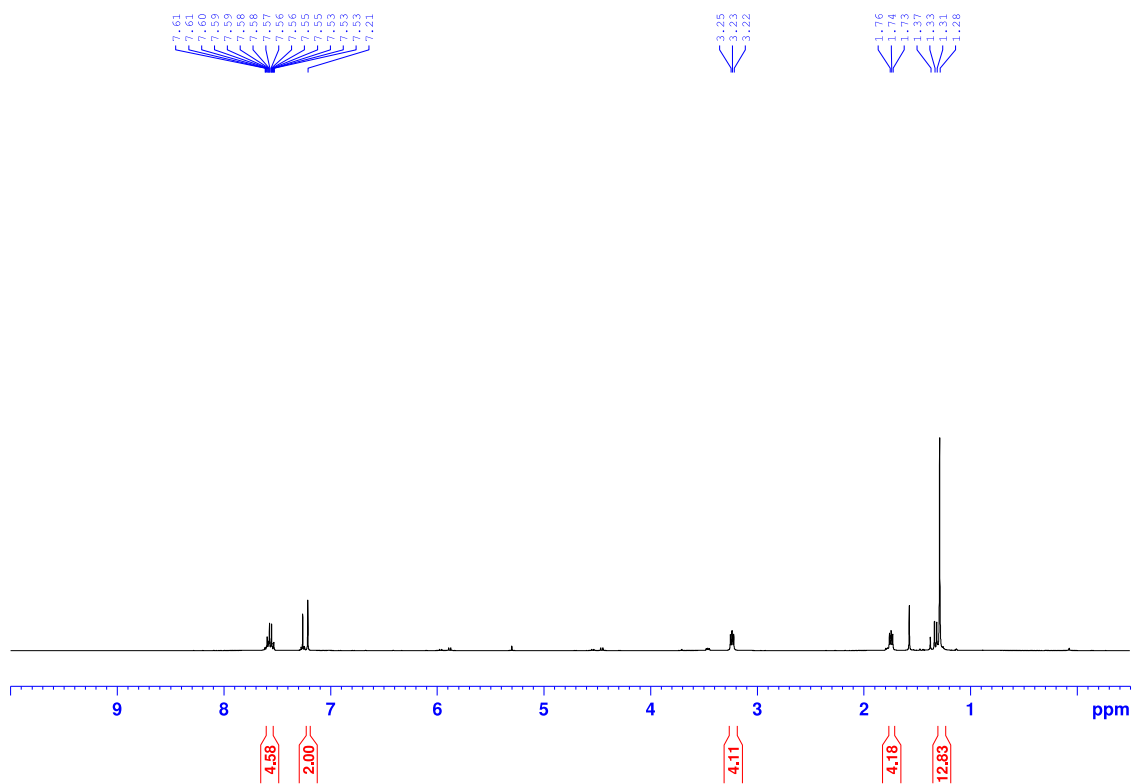

**Figure S14.**  $^1\text{H}$  NMR spectrum of **TMeJLD-H** (400 MHz,  $\text{CDCl}_3$ )

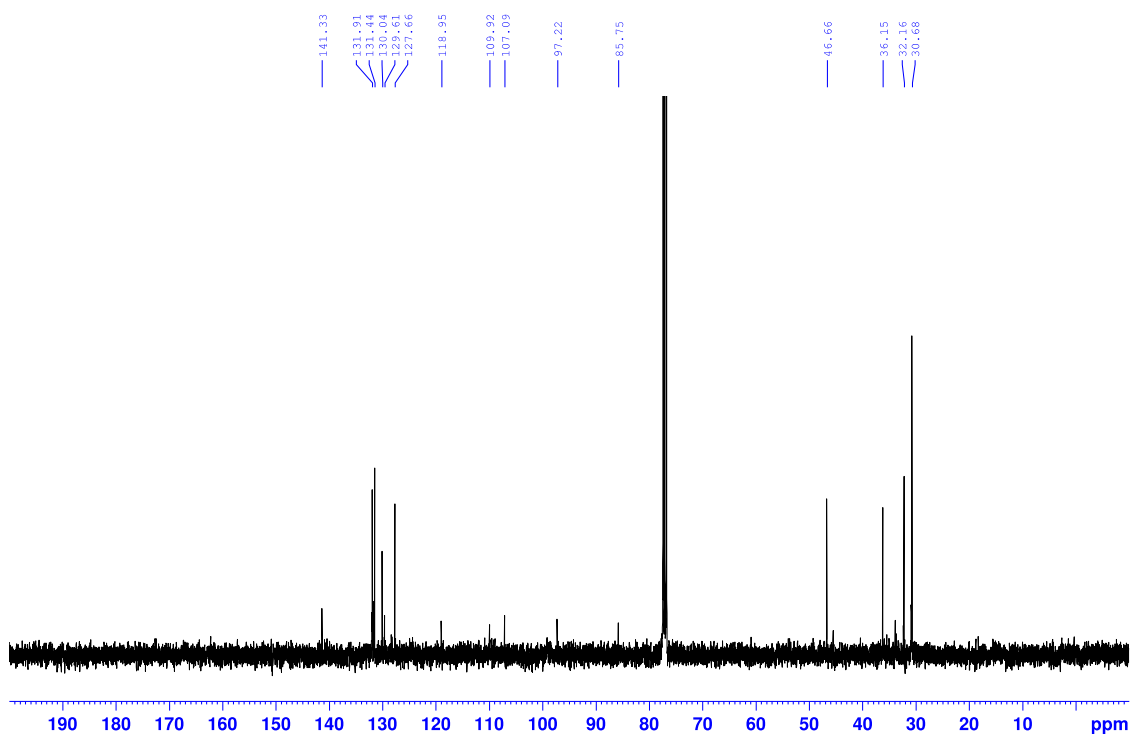

**Figure S15.**  $^{13}\text{C}$  NMR spectrum of TMeJLD-H (100 MHz,  $\text{CDCl}_3$ )

## Crystallographic analysis

Single crystal X-ray diffractions were recorded on an XtaLab AFC11 diffractometer (Rigaku). The reflection data were integrated, scaled, and averaged using CrysAlisPro (ver. 1.171.39.43a, Rigaku). Empirical absorption corrections were applied using the SCALE 3 ABSPACK scaling algorithm (CrysAlisPro). The structure was identified by a direct method (SHELXT-2018/2) and refined using a full matrix least square method (SHELXL-2014/7) visualized by Olex2. The crystallographic data were deposited into the Cambridge Crystallographic Data Centre (CCDC) database.

**Table S1.** Crystallographic data of **JLD-F**.

| Compound                                                                     | <b>JLD-F</b>                                                  | <b>JLD-H</b>                                   | <b>TMeJLD-F</b>                                               | <b>TMeJLD-H</b>                                |
|------------------------------------------------------------------------------|---------------------------------------------------------------|------------------------------------------------|---------------------------------------------------------------|------------------------------------------------|
| CCDC #                                                                       | 2369867                                                       | 2401628                                        | 2402070                                                       | 2401629                                        |
| Empirical Formula                                                            | C <sub>21</sub> H <sub>14</sub> F <sub>4</sub> N <sub>2</sub> | C <sub>21</sub> H <sub>18</sub> N <sub>2</sub> | C <sub>25</sub> H <sub>22</sub> F <sub>4</sub> N <sub>2</sub> | C <sub>25</sub> H <sub>26</sub> N <sub>2</sub> |
| Formula weight                                                               | 370.34                                                        | 298.37                                         | 426.44                                                        | 354.48                                         |
| Temperature [K]                                                              | 200                                                           | 173                                            | 173                                                           | 173                                            |
| Crystal Color / Habit                                                        | Orange / Plate                                                | Yellow / Block                                 | yellow / Plate                                                | Yellow / Block                                 |
| Crystal Size [mm]                                                            | 0.32x0.13x0.06                                                | 0.395x0.337x0.114                              | 0.244x0.176x0.043                                             | 0.266x0.16x0.113                               |
| Crystal System                                                               | Triclinic                                                     | Monoclinic                                     | Triclinic                                                     | Orthorhombic                                   |
| Space Group                                                                  | <i>P</i> −1                                                   | <i>P</i> 2 <sub>1</sub> / <i>c</i>             | <i>P</i> −1                                                   | <i>Pna</i> 2 <sub>1</sub>                      |
| <i>a</i> [Å]                                                                 | 6.7485(5)                                                     | 13.5475(8)                                     | 6.3253(5)                                                     | 18.4085(10)                                    |
| <i>b</i> [Å]                                                                 | 8.3818(7)                                                     | 8.1404(3)                                      | 16.5547(18)                                                   | 6.3801(3)                                      |
| <i>c</i> [Å]                                                                 | 15.2313(16)                                                   | 15.4286(8)                                     | 21.013(3)                                                     | 33.690(2)                                      |
| $\alpha$ [°]                                                                 | 93.866(8)                                                     | 90                                             | 70.720(11)                                                    | 90                                             |
| $\beta$ [°]                                                                  | 91.617(8)                                                     | 111.086(6)                                     | 89.417(9)                                                     | 90                                             |
| $\gamma$ [°]                                                                 | 97.057(7)                                                     | 90                                             | 89.860(8)                                                     | 90                                             |
| <i>V</i> [Å <sup>3</sup> ]                                                   | 852.50(13)                                                    | 1587.57(15)                                    | 2076.8(4)                                                     | 3956.9(4)                                      |
| <i>Z</i>                                                                     | 2                                                             | 4                                              | 4                                                             | 8                                              |
| <i>R</i> [ <i>F</i> <sup>2</sup> > 2 $\sigma$ ( <i>F</i> <sup>2</sup> )] [a] | 0.1578                                                        | 0.0427                                         | 0.2994                                                        | 0.0783                                         |
| <i>wR</i> <sub>2</sub> ( <i>F</i> <sup>2</sup> ) [b]                         | 0.4750                                                        | 0.1239                                         | 0.7073                                                        | 0.2117                                         |

[a]  $R = \Sigma||F_o| - |F_c|| / \Sigma|F_o|$ . [b]  $wR = \{[\Sigma w(|F_o| - |F_c|)] / \Sigma w|F_o|\}^{1/2}$ .

### DFT calculation

All computations were carried out using density functional theory (DFT) with the Gaussian 16 (Rev. B.01)<sup>[1]</sup> package. Geometry optimizations were executed using the CAM-B3LYP hybrid functional and 6-31+G(d,p) basis set.<sup>[2]</sup> Vertical excitations were also calculated using a TD-DFT method at the same level of theory except for geometry optimizations at excited state.

**Table S2.** Dipole moment (debye) of all derivatives at the S<sub>1</sub> state.

|                 | Dipole moment (debye)                           |
|-----------------|-------------------------------------------------|
| <b>IndCBZ-F</b> | X= -9.5318/ Y= 0.0000/ Z= -0.0001/ Tot= 9.5313  |
| <b>JLD-F</b>    | X= -11.4218/ Y= 0.0000/ Z= 0.0000/ Tot= 11.4218 |
| <b>TMeJLD-F</b> | X= 11.2173/ Y= 0.0000/ Z= 0.0000/ Tot= 11.2173  |
| <b>IndCBZ-H</b> | X= 7.4547/ Y= -0.0002/ Z= -0.0001/ Tot= 7.4547  |
| <b>JLD-H</b>    | X= -10.7299/ Y= 0.0000/ Z= 0.0001/ Tot= 10.7299 |
| <b>TMeJLD-H</b> | X= 10.5814/ Y= 0.0000/ Z= 0.0001/ Tot= 10.5814  |

**Table S3.** Vertical transition behavior from structure optimized at the S<sub>0</sub> state corresponding to absorption process.

| Sample          | Transition  | Transition Energy (eV) | Theoretical Absorption (nm) | Oscillator strength $f$ |
|-----------------|-------------|------------------------|-----------------------------|-------------------------|
| <b>IndCBZ-F</b> | HOMO → LUMO | 3.7895                 | 327.15                      | 1.3790                  |
| <b>JLD-F</b>    | HOMO → LUMO | 3.4297                 | 361.50                      | 1.3097                  |
| <b>TMeJLD-F</b> | HOMO → LUMO | 3.4260                 | 361.90                      | 1.3072                  |
| <b>IndCBZ-H</b> | HOMO → LUMO | 3.9397                 | 314.71                      | 0.1308                  |
| <b>JLD-H</b>    | HOMO → LUMO | 3.6840                 | 336.54                      | 1.3273                  |
| <b>TMeJLD-H</b> | HOMO → LUMO | 3.6885                 | 336.14                      | 1.3303                  |

**Table S4.** Vertical transition behavior from structure optimized at the S<sub>1</sub> state corresponding to emission process.

| Sample                          | Transition  | Transition Energy (eV) | Theoretical Absorption (nm) | Oscillator strength $f$ |
|---------------------------------|-------------|------------------------|-----------------------------|-------------------------|
| <b>IndCBZ-F</b>                 | HOMO → LUMO | 3.3479                 | 370.34                      | 1.5476                  |
| <b>JLD-F</b><br>(twist-bent)    | HOMO → LUMO | 2.0575                 | 602.59                      | 0.0001                  |
| <b>JLD-F</b><br>(planar)        | HOMO → LUMO | 3.1601                 | 392.34                      | 1.4764                  |
| <b>TMeJLD-F</b><br>(twist-bent) | HOMO → LUMO | 2.0488                 | 605.16                      | 0.0001                  |
| <b>TMeJLD-F</b><br>(planar)     | HOMO → LUMO | 3.5395                 | 350.29                      | 1.2873                  |
| <b>IndCBZ-H</b>                 | HOMO → LUMO | 3.7421                 | 331.32                      | 0.1578                  |
| <b>JLD-H</b>                    | HOMO → LUMO | 3.3113                 | 374.73                      | 1.4853                  |
| <b>TMeJLD-H</b>                 | HOMO → LUMO | 3.3086                 | 374.73                      | 1.4874                  |

**Table S5.** Cartesian coordinate for **IndCBZ-F** at the optimized geometry in  $S_0$  state using CAM-B3LYP/6-31+G(d,p) level of theory.

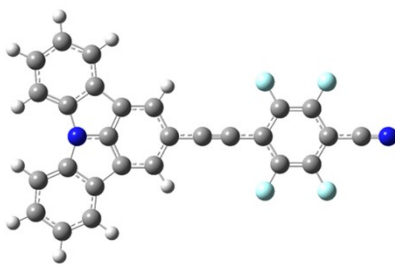

| No. | Atom | Type | Coordinates (Angstroms) |           |           | 21 | 7 | 0 | -4.400155 | 0.000019  | 0.000043  |
|-----|------|------|-------------------------|-----------|-----------|----|---|---|-----------|-----------|-----------|
|     |      |      | X                       | Y         | Z         |    |   |   |           |           |           |
| 1   | 6    | 0    | -2.473079               | -1.258162 | -0.000008 | 22 | 6 | 0 | -4.808444 | -1.342331 | -0.000063 |
| 2   | 6    | 0    | -1.083572               | -1.249615 | -0.000008 | 23 | 6 | 0 | -4.808387 | 1.342387  | 0.000072  |
| 3   | 6    | 0    | -0.4128                 | -0.000065 | 0.000049  | 24 | 6 | 0 | -3.634678 | 2.157225  | 0.000116  |
| 4   | 6    | 0    | -1.08352                | 1.249513  | 0.000097  | 25 | 6 | 0 | -3.774942 | -3.539458 | -0.000199 |
| 5   | 6    | 0    | -2.473027               | 1.258118  | 0.000105  | 26 | 6 | 0 | -5.04973  | -4.093955 | -0.000282 |
| 6   | 6    | 0    | -3.043927               | -0.00001  | 0.000063  | 27 | 6 | 0 | -6.183627 | -3.279966 | -0.000256 |
| 7   | 6    | 0    | 1.013353                | -0.000097 | 0.000049  | 28 | 6 | 0 | -6.079822 | -1.89289  | -0.000147 |
| 8   | 6    | 0    | 2.221703                | -0.000094 | 0.00004   | 29 | 6 | 0 | -6.079742 | 1.892999  | 0.000088  |
| 9   | 6    | 0    | 3.637069                | -0.000054 | 0.000017  | 30 | 6 | 0 | -6.183489 | 3.280079  | 0.000143  |
| 10  | 6    | 0    | 4.363037                | 1.195772  | -0.000211 | 31 | 6 | 0 | -5.049557 | 4.094021  | 0.000187  |
| 11  | 6    | 0    | 5.744644                | 1.197639  | -0.000231 | 32 | 6 | 0 | -3.774793 | 3.539469  | 0.000177  |
| 12  | 6    | 0    | 6.460927                | 0.000026  | -0.000023 | 33 | 6 | 0 | -3.634769 | -2.157219 | -0.000087 |
| 13  | 6    | 0    | 5.744711                | -1.197627 | 0.000206  | 34 | 1 | 0 | -0.490481 | -2.157511 | -0.000047 |
| 14  | 6    | 0    | 4.363104                | -1.195838 | 0.000225  | 35 | 1 | 0 | -0.490391 | 2.157384  | 0.000116  |
| 15  | 6    | 0    | 7.887446                | 0.000067  | -0.000046 | 36 | 1 | 0 | -2.897441 | -4.178484 | -0.000222 |
| 16  | 7    | 0    | 9.043141                | 0.000073  | -0.000047 | 37 | 1 | 0 | -5.165458 | -5.172669 | -0.00037  |
| 17  | 9    | 0    | 3.718101                | -2.359511 | 0.000446  | 38 | 1 | 0 | -7.168618 | -3.735583 | -0.000325 |
| 18  | 9    | 0    | 6.39582                 | -2.355269 | 0.000408  | 39 | 1 | 0 | -6.965167 | -1.26702  | -0.000129 |
| 19  | 9    | 0    | 3.717969                | 2.359409  | -0.000413 | 40 | 1 | 0 | -6.965114 | 1.267167  | 0.000059  |
| 20  | 9    | 0    | 6.395688                | 2.355318  | -0.000451 | 41 | 1 | 0 | -7.16846  | 3.735738  | 0.000154  |
|     |      |      |                         |           |           | 42 | 1 | 0 | -5.165239 | 5.17274   | 0.000233  |
|     |      |      |                         |           |           | 43 | 1 | 0 | -2.897265 | 4.178459  | 0.000214  |

**Table S6.** Cartesian coordinate for **IndCBZ-F** at the optimized geometry in S<sub>1</sub> state using CAM-B3LYP/6-31G(d) level of theory.

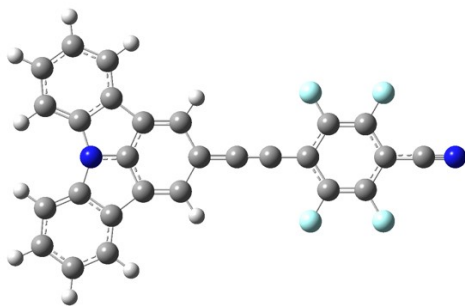

| No. | Atom | Type | Coordinates (Angstroms) |           |           | 21 | 7 | 0 | -4.380056 | 0.000001  | 0.000031  |
|-----|------|------|-------------------------|-----------|-----------|----|---|---|-----------|-----------|-----------|
|     |      |      | X                       | Y         | Z         |    |   |   |           |           |           |
| 1   | 6    | 0    | -3.460076               | 0.268739  | 0.000006  | 22 | 6 | 0 | -4.79929  | -1.345211 | 0.000017  |
| 2   | 6    | 0    | -1.084863               | -1.271829 | -0.000015 | 23 | 6 | 0 | -4.799289 | 1.345212  | 0.000018  |
| 3   | 6    | 0    | -0.38733                | -0.000001 | -0.000021 | 24 | 6 | 0 | -3.629708 | 2.163542  | 0.000006  |
| 4   | 6    | 0    | -1.084863               | 1.271828  | -0.000015 | 25 | 6 | 0 | -3.77471  | -3.542283 | -0.000008 |
| 5   | 6    | 0    | -2.460076               | 1.268739  | 0.000007  | 26 | 6 | 0 | -5.056001 | -4.090684 | -0.000009 |
| 6   | 6    | 0    | -3.035512               | 0         | 0.000023  | 27 | 6 | 0 | -6.184293 | -3.273067 | 0.000004  |
| 7   | 6    | 0    | 0.99342                 | -0.000001 | -0.000039 | 28 | 6 | 0 | -6.072705 | -1.883681 | 0.000017  |
| 8   | 6    | 0    | 2.232375                | -0.000002 | -0.000055 | 29 | 6 | 0 | -6.072703 | 1.883683  | 0.000019  |
| 9   | 6    | 0    | 3.610183                | -0.000002 | -0.000033 | 30 | 6 | 0 | -6.18429  | 3.27307   | 0.000007  |
| 10  | 6    | 0    | 4.365811                | 1.213483  | -0.000021 | 31 | 6 | 0 | -5.055998 | 4.090686  | -0.000005 |
| 11  | 6    | 0    | 5.731715                | 1.208577  | 0.000003  | 32 | 6 | 0 | -3.774707 | 3.542283  | -0.000004 |
| 12  | 6    | 0    | 6.465288                | -0.000001 | 0.000017  | 33 | 6 | 0 | -3.62971  | -2.163542 | 0.000004  |
| 13  | 6    | 0    | 5.731716                | -1.208579 | 0.000006  | 34 | 1 | 0 | -0.489031 | -2.177296 | -0.000031 |
| 14  | 6    | 0    | 4.365812                | -1.213487 | -0.000018 | 35 | 1 | 0 | -0.48903  | 2.177294  | -0.000032 |
| 15  | 6    | 0    | 7.877436                | 0         | 0.000042  | 36 | 1 | 0 | -2.901256 | -4.186408 | -0.000017 |
| 16  | 7    | 0    | 9.038451                | 0.00001   | 0.000061  | 37 | 1 | 0 | -5.176203 | -5.168721 | -0.000018 |
| 17  | 9    | 0    | 3.70473                 | -2.37328  | -0.000028 | 38 | 1 | 0 | -7.171613 | -3.722947 | 0.000003  |
| 18  | 9    | 0    | 6.395896                | -2.364918 | 0.000018  | 39 | 1 | 0 | -6.954808 | -1.253582 | 0.000027  |
| 19  | 9    | 0    | 3.704728                | 2.373277  | -0.000035 | 40 | 1 | 0 | -6.954807 | 1.253585  | 0.000028  |
| 20  | 9    | 0    | 6.395894                | 2.364917  | 0.000012  | 41 | 1 | 0 | -7.17161  | 3.72295   | 0.000006  |
|     |      |      |                         |           |           | 42 | 1 | 0 | -5.176199 | 5.168723  | -0.000014 |
|     |      |      |                         |           |           | 43 | 1 | 0 | -2.901253 | 4.186408  | -0.000013 |

**Table S7.** Cartesian coordinate for **JLD-F** at the optimized geometry in  $S_0$  state using CAM-B3LYP/6-31G+(d,p) level of theory.

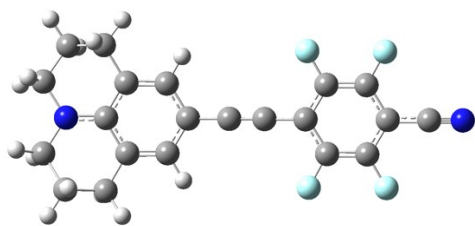

| No. | Atom | Type | Coordinates (Angstroms) |           |           | 20 | 9 | 0 | 2.767584  | 2.355672  | 0.147752  |
|-----|------|------|-------------------------|-----------|-----------|----|---|---|-----------|-----------|-----------|
|     |      |      | X                       | Y         | Z         |    |   |   |           |           |           |
| 1   | 6    | 0    | -2.07945                | -1.199256 | -0.69486  | 22 | 6 | 0 | -6.33854  | 1.222748  | -0.074068 |
| 2   | 6    | 0    | -3.460497               | -1.217166 | -0.085814 | 23 | 6 | 0 | -5.530378 | 2.396861  | -0.603369 |
| 3   | 6    | 0    | -4.176963               | 0.000001  | -0.000005 | 24 | 6 | 0 | -4.225506 | 2.512714  | 0.177471  |
| 4   | 6    | 0    | -3.460499               | 1.217167  | 0.085824  | 25 | 6 | 0 | -4.225504 | -2.512712 | -0.177484 |
| 5   | 6    | 0    | -2.079452               | 1.199255  | 0.069536  | 26 | 6 | 0 | -5.530393 | -2.396859 | 0.603327  |
| 6   | 6    | 0    | -1.359017               | 0         | 0.000037  | 27 | 6 | 0 | -6.338543 | -1.222745 | 0.07401   |
| 7   | 6    | 0    | 0.060395                | -0.000001 | 0.000061  | 28 | 1 | 0 | -1.53748  | -2.138952 | -0.12136  |
| 8   | 6    | 0    | 1.270386                | -0.000002 | 0.000061  | 29 | 1 | 0 | -1.537482 | 2.138951  | 0.121425  |
| 9   | 6    | 0    | 2.683389                | -0.000001 | 0.000035  | 30 | 1 | 0 | -6.747049 | 1.466416  | 0.919467  |
| 10  | 6    | 0    | 3.411888                | 1.193055  | 0.074825  | 31 | 1 | 0 | -7.198072 | 1.035056  | -0.729938 |
| 11  | 6    | 0    | 4.792912                | 1.194744  | 0.074905  | 32 | 1 | 0 | -6.126998 | 3.310139  | -0.520317 |
| 12  | 6    | 0    | 5.510642                | -0.000001 | -0.000022 | 33 | 1 | 0 | -5.310254 | 2.243034  | -1.665627 |
| 13  | 6    | 0    | 4.792909                | -1.194746 | -0.074917 | 34 | 1 | 0 | -4.453371 | 2.747407  | 1.226468  |
| 14  | 6    | 0    | 3.411886                | -1.193057 | -0.074785 | 35 | 1 | 0 | -3.613851 | 3.337355  | -0.201025 |
| 15  | 6    | 0    | 6.936696                | -0.000001 | -0.000046 | 36 | 1 | 0 | -3.613859 | -3.337355 | 0.201022  |
| 16  | 7    | 0    | 8.092569                | 0.000004  | -0.00007  | 37 | 1 | 0 | -4.453346 | -2.747399 | -1.226487 |
| 17  | 9    | 0    | 5.444204                | -2.35089  | -0.147487 | 38 | 1 | 0 | -5.310292 | -2.243034 | 1.66559   |
| 18  | 9    | 0    | 2.76758                 | -2.355675 | -0.147684 | 39 | 1 | 0 | -6.127011 | -3.310137 | 0.520261  |
| 19  | 9    | 0    | 5.444208                | 2.350888  | 0.14745   | 40 | 1 | 0 | -6.747036 | -1.466414 | -0.919532 |
|     |      |      |                         |           |           | 41 | 1 | 0 | -7.198086 | -1.035051 | 0.729865  |



**Table S8.** Cartesian coordinate for **JLD-F** at the optimized geometry in  $S_0$  state using B3LYP/6-31G+(d,p) level of theory.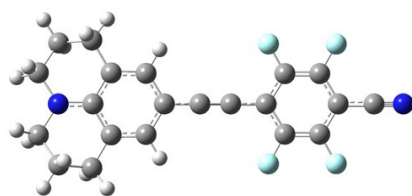

| No. | Atom | Type | Coordinates (Angstroms) |           |           | 20 | 9 | 0 | 2.776626  | 2.371021  | 0.145754  |
|-----|------|------|-------------------------|-----------|-----------|----|---|---|-----------|-----------|-----------|
|     |      |      | X                       | Y         | Z         |    |   |   |           |           |           |
| 1   | 6    | 0    | -2.086887               | -1.207736 | -0.066216 | 22 | 6 | 0 | -6.363409 | 1.230826  | -0.066829 |
| 2   | 6    | 0    | -3.472892               | -1.225894 | -0.082716 | 23 | 6 | 0 | -5.556618 | 2.412805  | -0.59673  |
| 3   | 6    | 0    | -4.194827               | 0.000001  | 0.000014  | 24 | 6 | 0 | -4.238957 | 2.526288  | 0.175341  |
| 4   | 6    | 0    | -3.472826               | 1.225863  | 0.082639  | 25 | 6 | 0 | -4.239094 | -2.526286 | -0.175304 |
| 5   | 6    | 0    | -2.086824               | 1.207644  | 0.065934  | 26 | 6 | 0 | -5.556639 | -2.412741 | 0.596957  |
| 6   | 6    | 0    | -1.358975               | -0.000062 | -0.000198 | 27 | 6 | 0 | -6.363454 | -1.230728 | 0.067171  |
| 7   | 6    | 0    | 0.054407                | -0.000094 | -0.000316 | 28 | 1 | 0 | -1.544296 | -2.147707 | -0.115498 |
| 8   | 6    | 0    | 1.275189                | -0.000095 | -0.000316 | 29 | 1 | 0 | -1.544184 | 2.147592  | 0.115131  |
| 9   | 6    | 0    | 2.682339                | -0.000052 | -0.000174 | 30 | 1 | 0 | -6.766118 | 1.466671  | 0.932163  |
| 10  | 6    | 0    | 3.425906                | 1.19753   | 0.073604  | 31 | 1 | 0 | -7.226198 | 1.042436  | -0.71935  |
| 11  | 6    | 0    | 4.810582                | 1.198832  | 0.073797  | 32 | 1 | 0 | -6.154195 | 3.325298  | -0.499941 |
| 12  | 6    | 0    | 5.541627                | 0.000033  | 0.000107  | 33 | 1 | 0 | -5.347055 | 2.268732  | -1.663712 |
| 13  | 6    | 0    | 4.810669                | -1.19881  | -0.073725 | 34 | 1 | 0 | -4.45688  | 2.763288  | 1.227305  |
| 14  | 6    | 0    | 3.425992                | -1.19759  | -0.073802 | 35 | 1 | 0 | -3.628308 | 3.349381  | -0.210144 |
| 15  | 6    | 0    | 6.966137                | 0.000075  | 0.000244  | 36 | 1 | 0 | -3.628426 | -3.349403 | 0.210097  |
| 16  | 7    | 0    | 8.129661                | 0.000139  | 0.000353  | 37 | 1 | 0 | -4.457179 | -2.76328  | -1.227235 |
| 17  | 9    | 0    | 5.465358                | -2.366278 | -0.145579 | 38 | 1 | 0 | -5.346915 | -2.268676 | 1.663909  |
| 18  | 9    | 0    | 2.776797                | -2.37112  | -0.146079 | 39 | 1 | 0 | -6.15427  | -3.325208 | 0.500256  |
| 19  | 9    | 0    | 5.465188                | 2.36634   | 0.145772  | 40 | 1 | 0 | -6.766317 | -1.466556 | -0.931763 |
|     |      |      |                         |           |           | 41 | 1 | 0 | -7.226141 | -1.042298 | 0.719816  |

**Table S9.** Cartesian coordinate for **JLD-F** at the optimized geometry in  $S_0$  state using B3LYP/cc-PVDZ level of theory.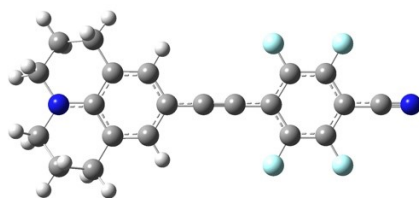

| No. | Atom | Type | Coordinates (Angstroms) |           |           | 20 | 9 | 0 | 2.776368  | 2.368618  | 0.144416  |
|-----|------|------|-------------------------|-----------|-----------|----|---|---|-----------|-----------|-----------|
|     |      |      | X                       | Y         | Z         |    |   |   |           |           |           |
| 1   | 6    | 0    | -2.088881               | -1.207579 | -0.065997 | 22 | 6 | 0 | -6.365149 | 1.23067   | -0.059764 |
| 2   | 6    | 0    | -3.476474               | -1.226391 | -0.082213 | 23 | 6 | 0 | -5.561081 | 2.410428  | -0.595074 |
| 3   | 6    | 0    | -4.199235               | 0.000006  | 0.000009  | 24 | 6 | 0 | -4.243004 | 2.526525  | 0.172426  |
| 4   | 6    | 0    | -3.476344               | 1.226332  | 0.082154  | 25 | 6 | 0 | -4.243273 | -2.526509 | -0.172401 |
| 5   | 6    | 0    | -2.088755               | 1.207382  | 0.065786  | 26 | 6 | 0 | -5.561256 | -2.410279 | 0.595239  |
| 6   | 6    | 0    | -1.36012                | -0.000134 | -0.000148 | 27 | 6 | 0 | -6.365264 | -1.230442 | 0.060013  |
| 7   | 6    | 0    | 0.056615                | -0.000208 | -0.000237 | 28 | 1 | 0 | -1.543074 | -2.152494 | -0.115072 |
| 8   | 6    | 0    | 1.28                    | -0.000214 | -0.00023  | 29 | 1 | 0 | -1.542849 | 2.152243  | 0.114796  |
| 9   | 6    | 0    | 2.691545                | -0.000118 | -0.000124 | 30 | 1 | 0 | -6.765228 | 1.470641  | 0.94707   |
| 10  | 6    | 0    | 3.428196                | 1.201545  | 0.073236  | 31 | 1 | 0 | -7.240098 | 1.045229  | -0.707473 |
| 11  | 6    | 0    | 4.815456                | 1.202789  | 0.073439  | 32 | 1 | 0 | -6.162469 | 3.327884  | -0.500268 |
| 12  | 6    | 0    | 5.540367                | 0.000069  | 0.000081  | 33 | 1 | 0 | -5.353073 | 2.261164  | -1.668396 |
| 13  | 6    | 0    | 4.815625                | -1.202747 | -0.073385 | 34 | 1 | 0 | -4.460137 | 2.76621   | 1.230664  |
| 14  | 6    | 0    | 3.428365                | -1.201684 | -0.07338  | 35 | 1 | 0 | -3.630167 | 3.354438  | -0.216089 |
| 15  | 6    | 0    | 6.967241                | 0.000161  | 0.000182  | 36 | 1 | 0 | -3.630476 | -3.35448  | 0.216051  |
| 16  | 7    | 0    | 8.131071                | 0.000296  | 0.000262  | 37 | 1 | 0 | -4.460542 | -2.766176 | -1.230615 |
| 17  | 9    | 0    | 5.47298                 | -2.364034 | -0.144317 | 38 | 1 | 0 | -5.353119 | -2.261034 | 1.668539  |
| 18  | 9    | 0    | 2.776702                | -2.368843 | -0.144652 | 39 | 1 | 0 | -6.162745 | -3.327676 | 0.500499  |
| 19  | 9    | 0    | 5.47265                 | 2.364162  | 0.144462  | 40 | 1 | 0 | -6.765473 | -1.470375 | -0.946779 |
|     |      |      |                         |           |           | 41 | 1 | 0 | -7.240127 | -1.044914 | 0.707814  |

**Table S10.** Cartesian coordinate for **JLD-F** (twist-bent) at the optimized geometry in S<sub>1</sub> state using CAM-B3LYP/6-31G(d) level of theory.

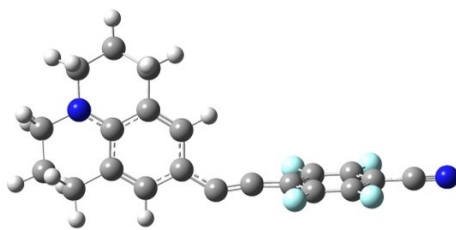

| No. | Atom | Type | Coordinates (Angstroms) |           |           | 20 | 9 | 0 | -2.751872 | -1.268077 | -2.011754 |
|-----|------|------|-------------------------|-----------|-----------|----|---|---|-----------|-----------|-----------|
|     |      |      | X                       | Y         | Z         |    |   |   |           |           |           |
| 1   | 6    | 0    | 2.09164                 | -1.030132 | 0.647104  | 21 | 7 | 0 | 5.525153  | 0.000279  | 0.000027  |
| 2   | 6    | 0    | 3.45597                 | -1.046516 | 0.670308  | 22 | 6 | 0 | 6.323079  | 1.097482  | -0.554063 |
| 3   | 6    | 0    | 4.177556                | 0.000042  | -0.000041 | 23 | 6 | 0 | 5.537801  | 2.391884  | -0.65714  |
| 4   | 6    | 0    | 3.455669                | 1.046343  | -0.670465 | 24 | 6 | 0 | 4.223856  | 2.128188  | -1.381646 |
| 5   | 6    | 0    | 2.091342                | 1.029477  | -0.6474   | 25 | 6 | 0 | 4.224467  | -2.128092 | 1.381563  |
| 6   | 6    | 0    | 1.348104                | -0.000456 | -0.00018  | 26 | 6 | 0 | 5.538578  | -2.391321 | 0.657189  |
| 7   | 6    | 0    | -0.036611               | -0.000715 | -0.000266 | 27 | 6 | 0 | 6.32341   | -1.096642 | 0.554195  |
| 8   | 6    | 0    | -1.280646               | -0.000787 | -0.000409 | 28 | 1 | 0 | 1.535239  | -1.818593 | 1.142331  |
| 9   | 6    | 0    | -2.660028               | -0.000459 | -0.000194 | 29 | 1 | 0 | 1.534713  | 1.817735  | -1.142692 |
| 10  | 6    | 0    | -3.42267                | -0.645119 | -1.023527 | 30 | 1 | 0 | 6.696804  | 0.791355  | -1.540426 |
| 11  | 6    | 0    | -4.783079               | -0.641576 | -1.018162 | 31 | 1 | 0 | 7.194103  | 1.221823  | 0.096957  |
| 12  | 6    | 0    | -5.533397               | 0.000265  | 0.000214  | 32 | 1 | 0 | 6.142206  | 3.132882  | -1.18654  |
| 13  | 6    | 0    | -4.782467               | 0.641729  | 1.018377  | 33 | 1 | 0 | 5.340002  | 2.785373  | 0.345759  |
| 14  | 6    | 0    | -3.422055               | 0.64459   | 1.023351  | 34 | 1 | 0 | 4.433153  | 1.81971   | -2.414791 |
| 15  | 6    | 0    | -6.940151               | 0.000613  | 0.000418  | 35 | 1 | 0 | 3.616609  | 3.034732  | -1.442334 |
| 16  | 7    | 0    | -8.102934               | 0.000898  | 0.000586  | 36 | 1 | 0 | 3.617534  | -3.034851 | 1.442187  |
| 17  | 9    | 0    | -5.440207               | 1.263767  | 2.005174  | 37 | 1 | 0 | 4.433552  | -1.819544 | 2.41473   |
| 18  | 9    | 0    | -2.750659               | 1.267206  | 2.011388  | 38 | 1 | 0 | 5.34102   | -2.784878 | -0.345731 |
| 19  | 9    | 0    | -5.441412               | -1.263295 | -2.004764 | 39 | 1 | 0 | 6.143192  | -3.132108 | 1.186649  |
|     |      |      |                         |           |           | 40 | 1 | 0 | 6.696928  | -0.790385 | 1.540596  |
|     |      |      |                         |           |           | 41 | 1 | 0 | 7.194544  | -1.220674 | -0.096738 |

**Table S11.** Cartesian coordinate for **JLD-F** at the optimized geometry in  $S_1$  state using CAM-B3LYP/6-31G+(d,p) level of theory.

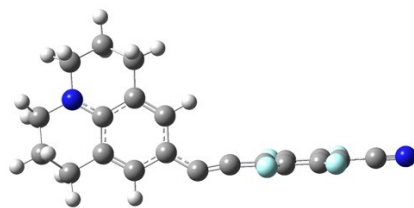

| No. | Atom | Type | Coordinates (Angstroms) |           |           | 20 | 9 | 0 | -2.619561 | 1.324655  | 2.036493  |
|-----|------|------|-------------------------|-----------|-----------|----|---|---|-----------|-----------|-----------|
|     |      |      | X                       | Y         | Z         |    |   |   |           |           |           |
| 1   | 6    | 0    | 1.64375                 | -0.548282 | 0.223507  | 21 | 7 | 0 | 5.287824  | -0.491824 | 0.186054  |
| 2   | 6    | 0    | 2.929753                | -0.969326 | 0.404127  | 22 | 6 | 0 | 6.431932  | 0.390564  | -0.060362 |
| 3   | 6    | 0    | 4.008459                | -0.095242 | 0.028718  | 23 | 6 | 0 | 6.053482  | 1.859087  | -0.01171  |
| 4   | 6    | 0    | 3.715772                | 1.202815  | -0.51512  | 24 | 6 | 0 | 4.853506  | 2.101917  | -0.918309 |
| 5   | 6    | 0    | 2.410821                | 1.584588  | -0.655339 | 25 | 6 | 0 | 3.249998  | -2.319505 | 0.987805  |
| 6   | 6    | 0    | 1.325189                | 0.737682  | -0.303452 | 26 | 6 | 0 | 4.545311  | -2.850221 | 0.386839  |
| 7   | 6    | 0    | -0.006291               | 1.159106  | -0.47115  | 27 | 6 | 0 | 5.65667   | -1.843385 | 0.617561  |
| 8   | 6    | 0    | -1.186319               | 0.730852  | -0.293505 | 28 | 1 | 0 | 0.820578  | -1.201239 | 0.494315  |
| 9   | 6    | 0    | -2.524091               | 0.450249  | -0.176205 | 29 | 1 | 0 | 2.173812  | 2.564228  | -1.056519 |
| 10  | 6    | 0    | -3.268565               | 0.740209  | 1.008516  | 30 | 1 | 0 | 6.86447   | 0.134892  | -1.037184 |
| 11  | 6    | 0    | -4.592662               | 0.43769   | 1.128058  | 31 | 1 | 0 | 7.186074  | 0.158702  | 0.697912  |
| 12  | 6    | 0    | -5.322484               | -0.181705 | 0.08742   | 32 | 1 | 0 | 6.913739  | 2.457616  | -0.321524 |
| 13  | 6    | 0    | -4.596801               | -0.469906 | -1.091366 | 33 | 1 | 0 | 5.808439  | 2.144704  | 1.016991  |
| 14  | 6    | 0    | -3.272766               | -0.171898 | -1.222306 | 34 | 1 | 0 | 5.136437  | 1.898774  | -1.959757 |
| 15  | 6    | 0    | -6.693046               | -0.495958 | 0.218477  | 35 | 1 | 0 | 4.531139  | 3.144909  | -0.878006 |
| 16  | 7    | 0    | -7.81962                | -0.756688 | 0.327157  | 36 | 1 | 0 | 2.419205  | -3.005404 | 0.807511  |
| 17  | 9    | 0    | -5.235746               | -1.057797 | -2.114038 | 37 | 1 | 0 | 3.360343  | -2.236411 | 2.077135  |
| 18  | 9    | 0    | -2.627778               | -0.476157 | -2.367298 | 38 | 1 | 0 | 4.416614  | -3.020824 | -0.687485 |
| 19  | 9    | 0    | -5.227598               | 0.735701  | 2.271623  | 39 | 1 | 0 | 4.831433  | -3.803754 | 0.83753   |
|     |      |      |                         |           |           | 40 | 1 | 0 | 5.930195  | -1.806303 | 1.680756  |
|     |      |      |                         |           |           | 41 | 1 | 0 | 6.55652   | -2.123921 | 0.061611  |

**Table S12.** Cartesian coordinate for **JLD-F** at the optimized geometry in  $S_1$  state using B3LYP/6-31+G(d,p) level of theory.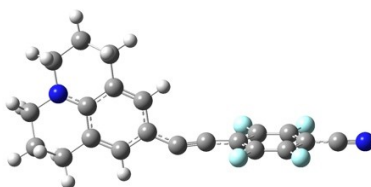

| No. | Atom | Type | Coordinates (Angstroms) |           |           | 20 | 9 | 0 | -2.683709 | -1.396989 | -1.972787 |
|-----|------|------|-------------------------|-----------|-----------|----|---|---|-----------|-----------|-----------|
|     |      |      | X                       | Y         | Z         |    |   |   |           |           |           |
| 1   | 6    | 0    | 1.766377                | 0.6628    | -0.333446 | 21 | 7 | 0 | 5.421196  | 0.363952  | -0.175697 |
| 2   | 6    | 0    | 3.095721                | 0.983561  | -0.505952 | 22 | 6 | 0 | 6.491438  | -0.575804 | 0.19244   |
| 3   | 6    | 0    | 4.09777                 | 0.068189  | -0.0273   | 23 | 6 | 0 | 6.010243  | -2.01997  | 0.246933  |
| 4   | 6    | 0    | 3.69993                 | -1.159169 | 0.608606  | 24 | 6 | 0 | 4.755221  | -2.109384 | 1.117101  |
| 5   | 6    | 0    | 2.353707                | -1.435546 | 0.740437  | 25 | 6 | 0 | 3.520868  | 2.263047  | -1.182997 |
| 6   | 6    | 0    | 1.349707                | -0.546364 | 0.285138  | 26 | 6 | 0 | 4.848371  | 2.751907  | -0.600895 |
| 7   | 6    | 0    | -0.034836               | -0.862553 | 0.446418  | 27 | 6 | 0 | 5.892742  | 1.649059  | -0.715325 |
| 8   | 6    | 0    | -1.222303               | -0.542601 | 0.278248  | 28 | 1 | 0 | 1.000854  | 1.347847  | -0.68226  |
| 9   | 6    | 0    | -2.593256               | -0.319654 | 0.159922  | 29 | 1 | 0 | 2.038601  | -2.360908 | 1.211131  |
| 10  | 6    | 0    | -3.346524               | -0.756985 | -0.976538 | 30 | 1 | 0 | 6.896628  | -0.265256 | 1.167127  |
| 11  | 6    | 0    | -4.6927                 | -0.54488  | -1.088876 | 31 | 1 | 0 | 7.293649  | -0.454697 | -0.543165 |
| 12  | 6    | 0    | -5.447274               | 0.128959  | -0.078463 | 32 | 1 | 0 | 6.81465   | -2.645069 | 0.645383  |
| 13  | 6    | 0    | -4.69675                | 0.569251  | 1.056092  | 33 | 1 | 0 | 5.790101  | -2.375577 | -0.766552 |
| 14  | 6    | 0    | -3.350596               | 0.357365  | 1.169044  | 34 | 1 | 0 | 5.010813  | -1.855168 | 2.156414  |
| 15  | 6    | 0    | -6.830102               | 0.346465  | -0.194042 | 35 | 1 | 0 | 4.357851  | -3.127904 | 1.1346    |
| 16  | 7    | 0    | -7.983827               | 0.53067   | -0.291869 | 36 | 1 | 0 | 2.738069  | 3.018061  | -1.071108 |
| 17  | 9    | 0    | -5.347216               | 1.221594  | 2.045308  | 37 | 1 | 0 | 3.63597   | 2.088769  | -2.262906 |
| 18  | 9    | 0    | -2.69169                | 0.805555  | 2.267454  | 38 | 1 | 0 | 4.716902  | 3.03014   | 0.451419  |
| 19  | 9    | 0    | -5.33925                | -0.98018  | -2.193262 | 39 | 1 | 0 | 5.211604  | 3.63756   | -1.13026  |
|     |      |      |                         |           |           | 40 | 1 | 0 | 6.177428  | 1.492259  | -1.766444 |
|     |      |      |                         |           |           | 41 | 1 | 0 | 6.805538  | 1.911618  | -0.170103 |

**Table S13.** Cartesian coordinate for **JLD-F** at the optimized geometry in  $S_1$  state using B3LYP/cc-PVDZ level of theory.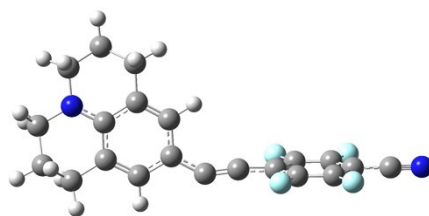

| No. | Atom | Type | Coordinates (Angstroms) |           |           | 20 | 9 | 0 | 2.658606  | 1.391233  | -1.988785 |
|-----|------|------|-------------------------|-----------|-----------|----|---|---|-----------|-----------|-----------|
|     |      |      | X                       | Y         | Z         |    |   |   |           |           |           |
| 1   | 6    | 0    | -1.712832               | -0.611773 | -0.279704 | 22 | 6 | 0 | -6.482307 | 0.492014  | 0.131613  |
| 2   | 6    | 0    | -3.029438               | -0.980837 | -0.46139  | 23 | 6 | 0 | -6.047787 | 1.950591  | 0.142781  |
| 3   | 6    | 0    | -4.068483               | -0.082039 | -0.029588 | 24 | 6 | 0 | -4.81362  | 2.1094    | 1.029696  |
| 4   | 6    | 0    | -3.719086               | 1.178568  | 0.570678  | 25 | 6 | 0 | -3.405794 | -2.29483  | -1.100423 |
| 5   | 6    | 0    | -2.38333                | 1.501892  | 0.713193  | 26 | 6 | 0 | -4.724844 | -2.80381  | -0.520895 |
| 6   | 6    | 0    | -1.341211               | 0.631321  | 0.303645  | 27 | 6 | 0 | -5.799834 | -1.739978 | -0.691089 |
| 7   | 6    | 0    | 0.030473                | 1.003049  | 0.476955  | 28 | 1 | 0 | -0.916001 | -1.287006 | -0.594867 |
| 8   | 6    | 0    | 1.21376                 | 0.63809   | 0.300455  | 29 | 1 | 0 | -2.102729 | 2.4573    | 1.159073  |
| 9   | 6    | 0    | 2.577595                | 0.387305  | 0.177771  | 30 | 1 | 0 | -6.897381 | 0.200973  | 1.115857  |
| 10  | 6    | 0    | 3.319876                | 0.766094  | -0.988918 | 31 | 1 | 0 | -7.275598 | 0.319644  | -0.61276  |
| 11  | 6    | 0    | 4.659417                | 0.507493  | -1.113057 | 32 | 1 | 0 | -6.883668 | 2.567033  | 0.504981  |
| 12  | 6    | 0    | 5.400835                | -0.156423 | -0.087864 | 33 | 1 | 0 | -5.817936 | 2.277431  | -0.885246 |
| 13  | 6    | 0    | 4.664534                | -0.535684 | 1.076422  | 34 | 1 | 0 | -5.081014 | 1.875792  | 2.07764   |
| 14  | 6    | 0    | 3.325032                | -0.278728 | 1.204142  | 35 | 1 | 0 | -4.448092 | 3.146219  | 1.024732  |
| 15  | 6    | 0    | 6.777377                | -0.424261 | -0.2187   | 36 | 1 | 0 | -2.597025 | -3.025105 | -0.955745 |
| 16  | 7    | 0    | 7.922166                | -0.649173 | -0.328376 | 37 | 1 | 0 | -3.512695 | -2.156687 | -2.192872 |
| 17  | 9    | 0    | 5.316191                | -1.167432 | 2.071883  | 38 | 1 | 0 | -4.600949 | -3.038789 | 0.549606  |
| 18  | 9    | 0    | 2.668609                | -0.662704 | 2.32199   | 39 | 1 | 0 | -5.054834 | -3.724788 | -1.023676 |
| 19  | 9    | 0    | 5.306158                | 0.883897  | -2.233206 | 40 | 1 | 0 | -6.073549 | -1.628761 | -1.757992 |
|     |      |      |                         |           |           | 41 | 1 | 0 | -6.720305 | -2.015348 | -0.152474 |

**Table S14.** Cartesian coordinate for **JLD-F** (planar) at the optimized geometry in  $S_1$  state using CAM-B3LYP/6-31G(d) level of theory.

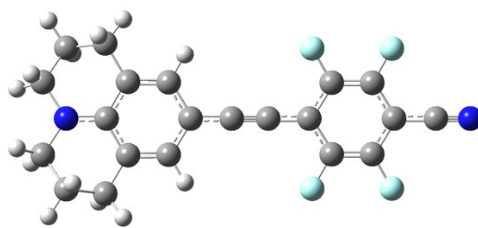

| No. | Atom | Type | Coordinates (Angstroms) |           |           | 20 | 9 | 0 | 2.756763  | 2.360821  | 0.242151  |
|-----|------|------|-------------------------|-----------|-----------|----|---|---|-----------|-----------|-----------|
|     |      |      | X                       | Y         | Z         |    |   |   |           |           |           |
| 1   | 6    | 0    | -2.082809               | -1.217146 | -0.018903 | 21 | 7 | 0 | -5.54181  | 0.000001  | -0.000002 |
| 2   | 6    | 0    | -3.453338               | -1.233174 | -0.035364 | 22 | 6 | 0 | -6.328849 | 1.222519  | -0.104605 |
| 3   | 6    | 0    | -4.174983               | 0         | -0.000001 | 23 | 6 | 0 | -5.531524 | 2.378384  | -0.684531 |
| 4   | 6    | 0    | -3.453336               | 1.233173  | 0.035363  | 24 | 6 | 0 | -4.222018 | 2.526984  | 0.08147   |
| 5   | 6    | 0    | -2.082807               | 1.217143  | 0.018905  | 25 | 6 | 0 | -4.222022 | -2.526983 | -0.081472 |
| 6   | 6    | 0    | -1.34508                | -0.000002 | 0.000001  | 26 | 6 | 0 | -5.531528 | -2.378381 | 0.684528  |
| 7   | 6    | 0    | 0.043815                | -0.000003 | 0.000004  | 27 | 6 | 0 | -6.328851 | -1.222515 | 0.104601  |
| 8   | 6    | 0    | 1.275724                | -0.000003 | 0.000004  | 28 | 1 | 0 | -1.534779 | -2.153654 | -0.030827 |
| 9   | 6    | 0    | 2.662257                | -0.000002 | 0.000004  | 29 | 1 | 0 | -1.534776 | 2.15365   | 0.030831  |
| 10  | 6    | 0    | 3.416147                | 1.203844  | 0.1233    | 30 | 1 | 0 | -6.713219 | 1.489761  | 0.892066  |
| 11  | 6    | 0    | 4.782657                | 1.2005    | 0.124542  | 31 | 1 | 0 | -7.20039  | 1.002995  | -0.732252 |
| 12  | 6    | 0    | 5.519248                | 0.000001  | -0.000002 | 32 | 1 | 0 | -6.132107 | 3.290441  | -0.626227 |
| 13  | 6    | 0    | 4.782658                | -1.2005   | -0.124543 | 33 | 1 | 0 | -5.323428 | 2.188775  | -1.743285 |
| 14  | 6    | 0    | 3.416148                | -1.203846 | -0.123296 | 34 | 1 | 0 | -4.440523 | 2.79684   | 1.123929  |
| 15  | 6    | 0    | 6.930806                | 0.000002  | -0.000006 | 35 | 1 | 0 | -3.613472 | 3.336758  | -0.330372 |
| 16  | 7    | 0    | 8.092282                | 0.000006  | -0.000008 | 36 | 1 | 0 | -3.613478 | -3.336759 | 0.33037   |
| 17  | 9    | 0    | 5.444829                | -2.353783 | -0.242746 | 37 | 1 | 0 | -4.440526 | -2.796838 | -1.123931 |
| 18  | 9    | 0    | 2.756766                | -2.360825 | -0.242141 | 38 | 1 | 0 | -5.323433 | -2.188773 | 1.743282  |
| 19  | 9    | 0    | 5.444826                | 2.353784  | 0.242744  | 39 | 1 | 0 | -6.132113 | -3.290437 | 0.626223  |
|     |      |      |                         |           |           | 40 | 1 | 0 | -6.713222 | -1.489757 | -0.892069 |
|     |      |      |                         |           |           | 41 | 1 | 0 | -7.200392 | -1.00299  | 0.732249  |

**Table S15.** Cartesian coordinate for TMeJLD-F at the optimized geometry in S<sub>0</sub> state using CAM-B3LYP/6-31+G(d,p) level of theory.

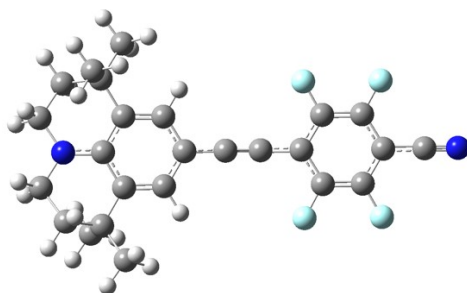

| No. | Atom | Type | Coordinates (Angstroms) |           |           |    |   |   |          |           |           |
|-----|------|------|-------------------------|-----------|-----------|----|---|---|----------|-----------|-----------|
|     |      |      | X                       | Y         | Z         |    |   |   |          |           |           |
|     |      |      |                         |           |           | 26 | 6 | 0 | 4.94181  | 2.335145  | 0.787324  |
|     |      |      |                         |           |           | 27 | 6 | 0 | 3.65629  | 2.543747  | -0.025655 |
| 1   | 6    | 0    | 2.885672                | 1.2277    | 0.008553  | 28 | 6 | 0 | 2.87721  | -3.704354 | -0.602445 |
| 2   | 6    | 0    | 1.503752                | 1.200889  | 0.017232  | 29 | 6 | 0 | 3.988829 | -2.903235 | 1.485528  |
| 3   | 6    | 0    | 0.78661                 | -0.000023 | 0.000026  | 30 | 6 | 0 | 2.877134 | 3.704364  | 0.602385  |
| 4   | 6    | 0    | 1.503777                | -1.200919 | -0.017201 | 31 | 6 | 0 | 3.988781 | 2.903214  | -1.48556  |
| 5   | 6    | 0    | 2.885698                | -1.227702 | -0.008552 | 32 | 1 | 0 | 0.946795 | 2.129933  | 0.028123  |
| 6   | 6    | 0    | 3.6004                  | 0.000006  | 0         | 33 | 1 | 0 | 0.946839 | -2.129975 | -0.028083 |
| 7   | 6    | 0    | -0.632965               | -0.000038 | 0.000051  | 34 | 1 | 0 | 5.548054 | -3.247564 | -0.783139 |
| 8   | 6    | 0    | -1.843077               | -0.000039 | 0.000048  | 35 | 1 | 0 | 4.670796 | -2.131173 | -1.829771 |
| 9   | 6    | 0    | -3.255965               | -0.000024 | 0.000033  | 36 | 1 | 0 | 6.280816 | -1.491648 | 0.685442  |
| 10  | 6    | 0    | -3.984629               | -1.195304 | -0.012575 | 37 | 1 | 0 | 6.566302 | -0.934353 | -0.958045 |
| 11  | 6    | 0    | -5.365615               | -1.196993 | -0.012637 | 38 | 1 | 0 | 6.566263 | 0.934423  | 0.958079  |
| 12  | 6    | 0    | -6.083444               | 0.000008  | -0.000017 | 39 | 1 | 0 | 6.280812 | 1.491711  | -0.685416 |
| 13  | 6    | 0    | -5.365589               | 1.196992  | 0.012632  | 40 | 1 | 0 | 4.670738 | 2.131231  | 1.829761  |
| 14  | 6    | 0    | -3.984603               | 1.195272  | 0.012614  | 41 | 1 | 0 | 5.547983 | 3.247625  | 0.783121  |
| 15  | 6    | 0    | -7.509449               | 0.000023  | -0.000037 | 42 | 1 | 0 | 2.553583 | -3.465279 | -1.620302 |
| 16  | 7    | 0    | -8.665331               | 0.000036  | -0.000054 | 43 | 1 | 0 | 3.514522 | -4.593651 | -0.648374 |
| 17  | 9    | 0    | -3.340254               | 2.36019   | 0.024846  | 44 | 1 | 0 | 1.993146 | -3.973304 | -0.017837 |
| 18  | 9    | 0    | -6.016836               | 2.355403  | 0.024814  | 45 | 1 | 0 | 3.069821 | -3.103143 | 2.044473  |
| 19  | 9    | 0    | -3.340305               | -2.360236 | -0.024782 | 46 | 1 | 0 | 4.617551 | -3.800339 | 1.531571  |
| 20  | 9    | 0    | -6.016887               | -2.355389 | -0.02484  | 47 | 1 | 0 | 4.512021 | -2.091725 | 1.99869   |
| 21  | 6    | 0    | 3.656341                | -2.543738 | 0.02563   | 48 | 1 | 0 | 2.553513 | 3.465314  | 1.62025   |
| 22  | 6    | 0    | 4.941863                | -2.335096 | -0.787335 | 49 | 1 | 0 | 3.514426 | 4.593678  | 0.648286  |
| 23  | 6    | 0    | 5.77262                 | -1.190167 | -0.242675 | 50 | 1 | 0 | 1.993063 | 3.973275  | 0.017769  |
| 24  | 7    | 0    | 4.979326                | 0.000023  | -0.000006 | 51 | 1 | 0 | 3.069773 | 3.103103  | -2.044513 |
| 25  | 6    | 0    | 5.772596                | 1.190225  | 0.242687  | 52 | 1 | 0 | 4.617495 | 3.800323  | -1.53162  |
|     |      |      |                         |           |           | 53 | 1 | 0 | 4.511982 | 2.091697  | -1.998701 |



**Table S16.** Cartesian coordinate for **TMeJLD-F** at the optimized geometry in  $S_0$  state using B3LYP/6-31G+(d,p) level of theory.

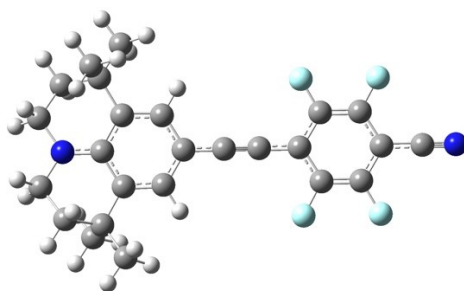

| No. | Atom | Type | Coordinates (Angstroms) |           |           | 26 | 6 | 0 | 4.972906 | 2.354191  | 0.76962   |
|-----|------|------|-------------------------|-----------|-----------|----|---|---|----------|-----------|-----------|
|     |      |      | X                       | Y         | Z         |    |   |   |          |           |           |
| 1   | 6    | 0    | 2.898436                | 1.237024  | 0.010535  | 27 | 6 | 0 | 3.666022 | 2.563277  | -0.02392  |
| 2   | 6    | 0    | 1.511781                | 1.208541  | 0.018313  | 28 | 6 | 0 | 2.88978  | -3.721378 | -0.632473 |
| 3   | 6    | 0    | 0.787144                | -0.000037 | 0.000035  | 29 | 6 | 0 | 3.972749 | -2.944233 | 1.494154  |
| 4   | 6    | 0    | 1.511819                | -1.208591 | -0.018267 | 30 | 6 | 0 | 2.889672 | 3.721369  | 0.63248   |
| 5   | 6    | 0    | 2.898475                | -1.237031 | -0.010526 | 31 | 6 | 0 | 3.972625 | 2.944257  | -1.494168 |
| 6   | 6    | 0    | 3.619461                | 0.000008  | -0.000004 | 32 | 1 | 0 | 0.953773 | 2.137187  | 0.028889  |
| 7   | 6    | 0    | -0.62641                | -0.000061 | 0.000051  | 33 | 1 | 0 | 0.953839 | -2.137254 | -0.028828 |
| 8   | 6    | 0    | -1.84734                | -0.000064 | 0.000045  | 34 | 1 | 0 | 5.580694 | -3.266277 | -0.749128 |
| 9   | 6    | 0    | -3.254329               | -0.000038 | 0.000021  | 35 | 1 | 0 | 4.720569 | -2.156841 | -1.819003 |
| 10  | 6    | 0    | -3.998126               | -1.199733 | -0.013259 | 36 | 1 | 0 | 6.287403 | -1.492622 | 0.725512  |
| 11  | 6    | 0    | -5.382745               | -1.20099  | -0.013285 | 37 | 1 | 0 | 6.604639 | -0.952138 | -0.920415 |
| 12  | 6    | 0    | -6.113838               | 0.000012  | -0.000015 | 38 | 1 | 0 | 6.604624 | 0.952246  | 0.920352  |
| 13  | 6    | 0    | -5.382704               | 1.200988  | 0.013276  | 39 | 1 | 0 | 6.287346 | 1.492725  | -0.725569 |
| 14  | 6    | 0    | -3.998084               | 1.199683  | 0.013286  | 40 | 1 | 0 | 4.720536 | 2.156891  | 1.818975  |
| 15  | 6    | 0    | -7.538312               | 0.000037  | -0.000034 | 41 | 1 | 0 | 5.580604 | 3.266355  | 0.749083  |
| 16  | 7    | 0    | -8.701851               | 0.000058  | -0.000049 | 42 | 1 | 0 | 2.589465 | -3.473944 | -1.656166 |
| 17  | 9    | 0    | -3.348739               | 2.37543   | 0.026203  | 43 | 1 | 0 | 3.524911 | -4.613483 | -0.670701 |
| 18  | 9    | 0    | -6.037312               | 2.370689  | 0.026148  | 44 | 1 | 0 | 1.991789 | -3.99164  | -0.06921  |
| 19  | 9    | 0    | -3.348822               | -2.375503 | -0.026155 | 45 | 1 | 0 | 3.042298 | -3.143022 | 2.035359  |
| 20  | 9    | 0    | -6.037394               | -2.370668 | -0.026175 | 46 | 1 | 0 | 4.592481 | -3.848576 | 1.53807   |
| 21  | 6    | 0    | 3.666105                | -2.56326  | 0.023912  | 47 | 1 | 0 | 4.495433 | -2.144962 | 2.027815  |
| 22  | 6    | 0    | 4.972965                | -2.354132 | -0.769653 | 48 | 1 | 0 | 2.589396 | 3.473931  | 1.656183  |
| 23  | 6    | 0    | 5.797522                | -1.202279 | -0.217227 | 49 | 1 | 0 | 3.524768 | 4.6135    | 0.670683  |
| 24  | 7    | 0    | 4.999849                | 0.000031  | -0.000021 | 50 | 1 | 0 | 1.991653 | 3.991591  | 0.069241  |
| 25  | 6    | 0    | 5.797489                | 1.202364  | 0.217177  | 51 | 1 | 0 | 3.042156 | 3.143012  | -2.035355 |
|     |      |      |                         |           |           | 52 | 1 | 0 | 4.592323 | 3.848622  | -1.538097 |
|     |      |      |                         |           |           | 53 | 1 | 0 | 4.495327 | 2.145004  | -2.027838 |

**Table S17.** Cartesian coordinate for TMeJLD-F at the optimized geometry in S<sub>0</sub> state using B3LYP/cc-PVDZ level of theory.

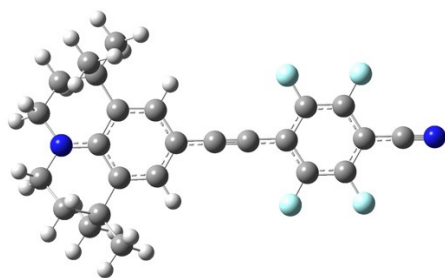

| No. | Atom | Type | Coordinates (Angstroms) |           |           | 26 | 6 | 0 | 4.974439 | 2.35181   | 0.770579  |
|-----|------|------|-------------------------|-----------|-----------|----|---|---|----------|-----------|-----------|
|     |      |      | X                       | Y         | Z         |    |   |   |          |           |           |
| 1   | 6    | 0    | 2.901559                | 1.236935  | 0.008795  | 27 | 6 | 0 | 3.67041  | 2.563188  | -0.025643 |
| 2   | 6    | 0    | 1.513277                | 1.208574  | 0.018421  | 28 | 6 | 0 | 2.892692 | -3.719334 | -0.627578 |
| 3   | 6    | 0    | 0.787684                | 0.00003   | 0.000001  | 29 | 6 | 0 | 3.977957 | -2.938255 | 1.494864  |
| 4   | 6    | 0    | 1.513247                | -1.208533 | -0.01842  | 30 | 6 | 0 | 2.892783 | 3.719341  | 0.627574  |
| 5   | 6    | 0    | 2.901528                | -1.236929 | -0.008796 | 31 | 6 | 0 | 3.978032 | 2.938232  | -1.494865 |
| 6   | 6    | 0    | 3.623248                | -0.000006 | -0.000001 | 32 | 1 | 0 | 0.952424 | 2.142296  | 0.027759  |
| 7   | 6    | 0    | -0.629128               | 0.00005   | 0.000003  | 33 | 1 | 0 | 0.952371 | -2.142241 | -0.027756 |
| 8   | 6    | 0    | -1.852652               | 0.000053  | 0.000002  | 34 | 1 | 0 | 5.587021 | -3.267954 | -0.756064 |
| 9   | 6    | 0    | -3.264015               | 0.000031  | 0.000002  | 35 | 1 | 0 | 4.716313 | -2.150541 | -1.824213 |
| 10  | 6    | 0    | -4.000918               | -1.203685 | -0.014816 | 36 | 1 | 0 | 6.294573 | -1.496632 | 0.72839   |
| 11  | 6    | 0    | -5.388129               | -1.204897 | -0.014851 | 37 | 1 | 0 | 6.613238 | -0.952246 | -0.923041 |
| 12  | 6    | 0    | -6.113088               | -0.000011 | -0.000001 | 38 | 1 | 0 | 6.613257 | 0.952158  | 0.923048  |
| 13  | 6    | 0    | -5.388164               | 1.204896  | 0.014851  | 39 | 1 | 0 | 6.294616 | 1.496556  | -0.728383 |
| 14  | 6    | 0    | -4.000953               | 1.203725  | 0.014818  | 40 | 1 | 0 | 4.716362 | 2.150502  | 1.824214  |
| 15  | 6    | 0    | -7.539925               | -0.000031 | -0.000002 | 41 | 1 | 0 | 5.5871   | 3.267894  | 0.756067  |
| 16  | 7    | 0    | -8.703769               | -0.000047 | -0.000003 | 42 | 1 | 0 | 2.590357 | -3.47184  | -1.657289 |
| 17  | 9    | 0    | -3.349081               | 2.373029  | 0.029169  | 43 | 1 | 0 | 3.527367 | -4.619551 | -0.665541 |
| 18  | 9    | 0    | -6.045452               | 2.368354  | 0.029172  | 44 | 1 | 0 | 1.988456 | -3.987388 | -0.060956 |
| 19  | 9    | 0    | -3.349012               | -2.372969 | -0.029166 | 45 | 1 | 0 | 3.042919 | -3.136462 | 2.041676  |
| 20  | 9    | 0    | -6.045383               | -2.368373 | -0.029173 | 46 | 1 | 0 | 4.602582 | -3.846949 | 1.545168  |
| 21  | 6    | 0    | 3.670347                | -2.563201 | 0.025642  | 47 | 1 | 0 | 4.502204 | -2.131438 | 2.029224  |
| 22  | 6    | 0    | 4.974383                | -2.351855 | -0.770578 | 48 | 1 | 0 | 2.590441 | 3.471856  | 1.657285  |
| 23  | 6    | 0    | 5.799133                | -1.201754 | -0.217866 | 49 | 1 | 0 | 3.527479 | 4.619542  | 0.665534  |
| 24  | 7    | 0    | 5.004814                | -0.000022 | -0.000003 | 50 | 1 | 0 | 1.988554 | 3.987415  | 0.060951  |
| 25  | 6    | 0    | 5.799162                | 1.201689  | 0.217869  | 51 | 1 | 0 | 3.043    | 3.136463  | -2.041679 |
|     |      |      |                         |           |           | 52 | 1 | 0 | 4.602681 | 3.84691   | -1.545169 |
|     |      |      |                         |           |           | 53 | 1 | 0 | 4.50226  | 2.1314    | -2.029224 |

**Table S18.** Cartesian coordinate for **TMeJLD-F** (twist-bent) at the optimized geometry in  $S_1$  state using CAM-B3LYP/6-31G(d) level of theory.

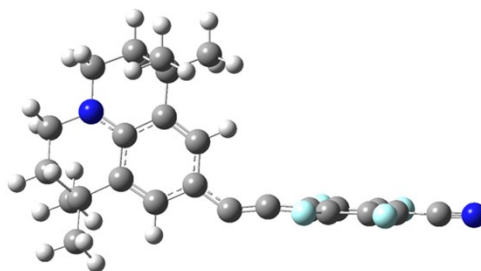

| No. | Atom | Type | Coordinates (Angstroms) |           |           | 26 | 6 | 0 | 3.889702 | 2.872895  | 0.802156  |
|-----|------|------|-------------------------|-----------|-----------|----|---|---|----------|-----------|-----------|
|     |      |      | X                       | Y         | Z         |    |   |   |          |           |           |
| 1   | 6    | 0    | 2.336246                | 1.124622  | 0.033336  | 27 | 6 | 0 | 2.593114 | 2.627352  | 0.021418  |
| 2   | 6    | 0    | 1.070515                | 0.613504  | 0.023538  | 28 | 6 | 0 | 4.065552 | -3.510162 | -0.719839 |
| 3   | 6    | 0    | 0.80069                 | -0.782927 | -0.022728 | 29 | 6 | 0 | 4.772982 | -2.478402 | 1.444083  |
| 4   | 6    | 0    | 1.916414                | -1.658671 | -0.055988 | 30 | 6 | 0 | 1.468447 | 3.418893  | 0.697856  |
| 5   | 6    | 0    | 3.209394                | -1.21616  | -0.040949 | 31 | 6 | 0 | 2.731132 | 3.105968  | -1.43643  |
| 6   | 6    | 0    | 3.449147                | 0.205734  | 0.00422   | 32 | 1 | 0 | 0.213234 | 1.274362  | 0.0429    |
| 7   | 6    | 0    | -0.509786               | -1.286175 | -0.036977 | 33 | 1 | 0 | 1.698713 | -2.718499 | -0.086849 |
| 8   | 6    | 0    | -1.706911               | -0.862233 | -0.022712 | 34 | 1 | 0 | 6.433723 | -2.151135 | -0.73945  |
| 9   | 6    | 0    | -3.053126               | -0.609265 | -0.014553 | 35 | 1 | 0 | 5.266879 | -1.389247 | -1.819207 |
| 10  | 6    | 0    | -3.796785               | -0.400765 | -1.216384 | 36 | 1 | 0 | 6.396271 | -0.282115 | 0.79811   |
| 11  | 6    | 0    | -5.126661               | -0.101631 | -1.199968 | 37 | 1 | 0 | 6.578607 | 0.376065  | -0.823562 |
| 12  | 6    | 0    | -5.852233               | 0.02524   | 0.005673  | 38 | 1 | 0 | 5.906942 | 2.117364  | 0.903645  |
| 13  | 6    | 0    | -5.127118               | -0.180309 | 1.200715  | 39 | 1 | 0 | 5.378453 | 2.508988  | -0.728541 |
| 14  | 6    | 0    | -3.797234               | -0.479875 | 1.19808   | 40 | 1 | 0 | 3.73728  | 2.591193  | 1.850456  |
| 15  | 6    | 0    | -7.227835               | 0.339354  | 0.015674  | 41 | 1 | 0 | 4.147225 | 3.936635  | 0.787837  |
| 16  | 7    | 0    | -8.358979               | 0.600368  | 0.023956  | 42 | 1 | 0 | 3.705642 | -3.346949 | -1.740104 |
| 17  | 9    | 0    | -3.148002               | -0.661424 | 2.361051  | 43 | 1 | 0 | 4.970227 | -4.124105 | -0.771642 |
| 18  | 9    | 0    | -5.768738               | -0.074695 | 2.368918  | 44 | 1 | 0 | 3.31341  | -4.091894 | -0.181449 |
| 19  | 9    | 0    | -3.147029               | -0.505633 | -2.388537 | 45 | 1 | 0 | 3.958054 | -3.000088 | 1.953277  |
| 20  | 9    | 0    | -5.767778               | 0.080273  | -2.359031 | 46 | 1 | 0 | 5.663303 | -3.115618 | 1.485124  |
| 21  | 6    | 0    | 4.385462                | -2.18562  | -0.017955 | 47 | 1 | 0 | 4.978985 | -1.56716  | 2.013292  |
| 22  | 6    | 0    | 5.543615                | -1.514635 | -0.766008 | 48 | 1 | 0 | 1.277119 | 3.057866  | 1.712816  |
| 23  | 6    | 0    | 5.88962                 | -0.168408 | -0.168519 | 49 | 1 | 0 | 1.750746 | 4.474575  | 0.759397  |
| 24  | 7    | 0    | 4.713727                | 0.677237  | 0.019429  | 50 | 1 | 0 | 0.532628 | 3.369851  | 0.136     |
| 25  | 6    | 0    | 5.04587                 | 2.084535  | 0.22703   | 51 | 1 | 0 | 1.785643 | 2.971579  | -1.968794 |
|     |      |      |                         |           |           | 52 | 1 | 0 | 2.990986 | 4.169823  | -1.46808  |
|     |      |      |                         |           |           | 53 | 1 | 0 | 3.495341 | 2.551427  | -1.989103 |

**Table S19.** Cartesian coordinate for TMeJLD-F at the optimized geometry in S<sub>1</sub> state using CAM-B3LYP/6-31+G(d,p) level of theory.

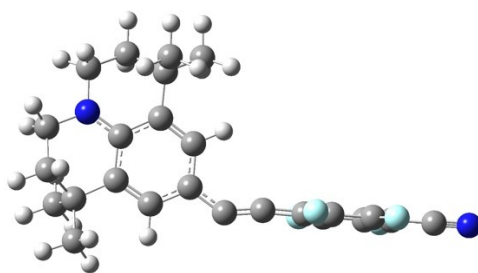

| No. | Atom | Type | Coordinates (Angstroms) |           |           | 26 | 6 | 0 | -5.543223 | 1.532031  | -0.769833 |
|-----|------|------|-------------------------|-----------|-----------|----|---|---|-----------|-----------|-----------|
|     |      |      | X                       | Y         | Z         |    |   |   |           |           |           |
| 1   | 6    | 0    | -3.210094               | 1.221703  | -0.047827 | 27 | 6 | 0 | -4.380294 | 2.198209  | -0.024178 |
| 2   | 6    | 0    | -1.91394                | 1.656173  | -0.068421 | 28 | 6 | 0 | -1.497648 | -3.425291 | 0.710895  |
| 3   | 6    | 0    | -0.804846               | 0.771601  | -0.031252 | 29 | 6 | 0 | -2.757909 | -3.111534 | -1.425836 |
| 4   | 6    | 0    | -1.081708               | -0.623944 | 0.024321  | 30 | 6 | 0 | -4.054275 | 3.521151  | -0.727195 |
| 5   | 6    | 0    | -2.350931               | -1.127287 | 0.037505  | 31 | 6 | 0 | -4.763756 | 2.494309  | 1.43941   |
| 6   | 6    | 0    | -3.459518               | -0.200289 | 0.004353  | 32 | 1 | 0 | -1.690228 | 2.714314  | -0.105116 |
| 7   | 6    | 0    | 0.512921                | 1.262118  | -0.049727 | 33 | 1 | 0 | -0.229584 | -1.29098  | 0.046417  |
| 8   | 6    | 0    | 1.707714                | 0.838834  | -0.030567 | 34 | 1 | 0 | -4.180144 | -3.92381  | 0.801418  |
| 9   | 6    | 0    | 3.05445                 | 0.577328  | -0.018671 | 35 | 1 | 0 | -3.760891 | -2.578551 | 1.859936  |
| 10  | 6    | 0    | 3.806035                | 0.471447  | 1.192187  | 36 | 1 | 0 | -5.401673 | -2.493186 | -0.719649 |
| 11  | 6    | 0    | 5.139763                | 0.188651  | 1.198593  | 37 | 1 | 0 | -5.927759 | -2.092916 | 0.91156   |
| 12  | 6    | 0    | 5.873797                | -0.01706  | 0.007661  | 38 | 1 | 0 | -6.588273 | -0.3526   | -0.823204 |
| 13  | 6    | 0    | 5.141141                | 0.088847  | -1.197084 | 39 | 1 | 0 | -6.402829 | 0.308547  | 0.797255  |
| 14  | 6    | 0    | 3.807419                | 0.371068  | -1.21567  | 40 | 1 | 0 | -5.267707 | 1.404089  | -1.822826 |
| 15  | 6    | 0    | 7.254452                | -0.313309 | 0.020759  | 41 | 1 | 0 | -6.428772 | 2.174207  | -0.743313 |
| 16  | 7    | 0    | 8.389499                | -0.559475 | 0.031582  | 42 | 1 | 0 | -1.305962 | -3.064647 | 1.725441  |
| 17  | 9    | 0    | 3.156501                | 0.452467  | -2.394568 | 43 | 1 | 0 | -1.787033 | -4.478489 | 0.773041  |
| 18  | 9    | 0    | 5.783433                | -0.096611 | -2.360329 | 44 | 1 | 0 | -0.56109  | -3.383696 | 0.15094   |
| 19  | 9    | 0    | 3.153915                | 0.650913  | 2.359445  | 45 | 1 | 0 | -1.810052 | -2.990627 | -1.956039 |
| 20  | 9    | 0    | 5.780786                | 0.100712  | 2.373924  | 46 | 1 | 0 | -3.029338 | -4.172136 | -1.452201 |
| 21  | 6    | 0    | -2.617356               | -2.628436 | 0.031404  | 47 | 1 | 0 | -3.513807 | -2.551439 | -1.983022 |
| 22  | 6    | 0    | -3.916195               | -2.861999 | 0.812743  | 48 | 1 | 0 | -3.699697 | 3.356454  | -1.748616 |
| 23  | 6    | 0    | -5.066888               | -2.068709 | 0.235012  | 49 | 1 | 0 | -4.955633 | 4.139372  | -0.775033 |
| 24  | 7    | 0    | -4.725888               | -0.663082 | 0.022203  | 50 | 1 | 0 | -3.297704 | 4.098736  | -0.19188  |
| 25  | 6    | 0    | -5.897365               | 0.18995   | -0.169267 | 51 | 1 | 0 | -3.947709 | 3.017105  | 1.944417  |
|     |      |      |                         |           |           | 52 | 1 | 0 | -5.653201 | 3.131921  | 1.480041  |
|     |      |      |                         |           |           | 53 | 1 | 0 | -4.968385 | 1.585538  | 2.011805  |

**Table S20.** Cartesian coordinate for **TMeJLD-F** at the optimized geometry in  $S_1$  state using B3LYP/6-31+G(d,p) level of theory.

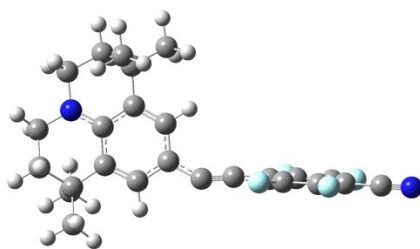

| No. | Atom | Type | Coordinates (Angstroms) |           |           | 26 | 6 | 0 | -5.486337 | -1.769061 | 0.749288  |
|-----|------|------|-------------------------|-----------|-----------|----|---|---|-----------|-----------|-----------|
|     |      |      | X                       | Y         | Z         |    |   |   |           |           |           |
| 1   | 6    | 0    | -3.175226               | -1.244698 | 0.033069  | 27 | 6 | 0 | -4.253705 | -2.329695 | 0.012972  |
| 2   | 6    | 0    | -1.832596               | -1.567786 | 0.0385    | 28 | 6 | 0 | -1.857663 | 3.540999  | -0.727508 |
| 3   | 6    | 0    | -0.81098                | -0.590316 | 0.010438  | 29 | 6 | 0 | -3.035374 | 3.131863  | 1.454908  |
| 4   | 6    | 0    | -1.198457               | 0.77379   | -0.023774 | 30 | 6 | 0 | -3.809181 | -3.616618 | 0.736069  |
| 5   | 6    | 0    | -2.517551               | 1.174689  | -0.029431 | 31 | 6 | 0 | -4.596098 | -2.678449 | -1.458879 |
| 6   | 6    | 0    | -3.542985               | 0.15387   | -0.001512 | 32 | 1 | 0 | -1.521234 | -2.603978 | 0.061433  |
| 7   | 6    | 0    | 0.565948                | -0.97194  | 0.01726   | 33 | 1 | 0 | -0.406726 | 1.511222  | -0.041657 |
| 8   | 6    | 0    | 1.763183                | -0.645255 | 0.009925  | 34 | 1 | 0 | -4.590942 | 3.830429  | -0.726704 |
| 9   | 6    | 0    | 3.140648                | -0.429158 | 0.005846  | 35 | 1 | 0 | -4.085385 | 2.546046  | -1.823706 |
| 10  | 6    | 0    | 3.900042                | -0.338177 | -1.204644 | 36 | 1 | 0 | -5.659904 | 2.265446  | 0.79041   |
| 11  | 6    | 0    | 5.251828                | -0.132343 | -1.208068 | 37 | 1 | 0 | -6.191885 | 1.864408  | -0.839582 |
| 12  | 6    | 0    | 6.007126                | 0.006436  | -0.001857 | 38 | 1 | 0 | -6.702174 | 0.020655  | 0.803647  |
| 13  | 6    | 0    | 5.250573                | -0.081176 | 1.208356  | 39 | 1 | 0 | -6.428254 | -0.599183 | -0.821511 |
| 14  | 6    | 0    | 3.898806                | -0.287061 | 1.212196  | 40 | 1 | 0 | -5.239693 | -1.628476 | 1.808871  |
| 15  | 6    | 0    | 7.39563                 | 0.217683  | -0.005583 | 41 | 1 | 0 | -6.31372  | -2.485066 | 0.703519  |
| 16  | 7    | 0    | 8.554315                | 0.397073  | -0.008712 | 42 | 1 | 0 | -1.662579 | 3.192557  | -1.746652 |
| 17  | 9    | 0    | 3.23482                 | -0.353532 | 2.394068  | 43 | 1 | 0 | -2.232056 | 4.568444  | -0.784717 |
| 18  | 9    | 0    | 5.901346                | 0.050262  | 2.386008  | 44 | 1 | 0 | -0.906559 | 3.576179  | -0.190594 |
| 19  | 9    | 0    | 3.237335                | -0.454774 | -2.383302 | 45 | 1 | 0 | -2.06921  | 3.068206  | 1.963296  |
| 20  | 9    | 0    | 5.903872                | -0.050923 | -2.389524 | 46 | 1 | 0 | -3.368333 | 4.175529  | 1.48681   |
| 21  | 6    | 0    | -2.899841               | 2.656454  | -0.014953 | 47 | 1 | 0 | -3.744789 | 2.528901  | 2.030442  |
| 22  | 6    | 0    | -4.238571               | 2.794295  | -0.766244 | 48 | 1 | 0 | -3.474507 | -3.409467 | 1.757457  |
| 23  | 6    | 0    | -5.313677               | 1.894878  | -0.184301 | 49 | 1 | 0 | -4.65261  | -4.313063 | 0.788537  |
| 24  | 7    | 0    | -4.858414               | 0.511231  | -0.0085   | 50 | 1 | 0 | -3.001211 | -4.130366 | 0.209256  |
| 25  | 6    | 0    | -5.952666               | -0.451371 | 0.157941  | 51 | 1 | 0 | -3.724778 | -3.11317  | -1.956786 |
|     |      |      |                         |           |           | 52 | 1 | 0 | -5.41007  | -3.411428 | -1.495517 |
|     |      |      |                         |           |           | 53 | 1 | 0 | -4.898304 | -1.802363 | -2.041108 |

**Table S21.** Cartesian coordinate for TMeJLD-F at the optimized geometry in S<sub>1</sub> state using B3LYP/cc-PVDZ level of theory.

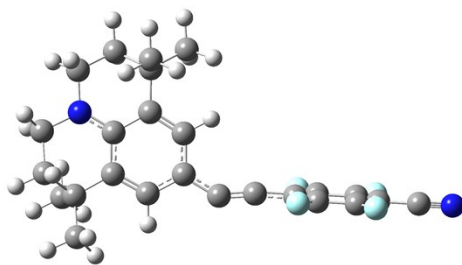

| No. | Atom | Type | Coordinates (Angstroms) |           |           | 26 | 6 | 0 | -5.524921 | -1.677138 | 0.753952  |
|-----|------|------|-------------------------|-----------|-----------|----|---|---|-----------|-----------|-----------|
|     |      |      | X                       | Y         | Z         |    |   |   |           |           |           |
| 1   | 6    | 0    | -3.199891               | -1.235344 | 0.032898  | 27 | 6 | 0 | -4.316734 | -2.282123 | 0.01399   |
| 2   | 6    | 0    | -1.868293               | -1.604968 | 0.040055  | 28 | 6 | 0 | -1.719173 | 3.500971  | -0.725958 |
| 3   | 6    | 0    | -0.809892               | -0.664169 | 0.009894  | 29 | 6 | 0 | -2.915529 | 3.129905  | 1.451395  |
| 4   | 6    | 0    | -1.153206               | 0.713816  | -0.027045 | 30 | 6 | 0 | -3.91501  | -3.582289 | 0.733852  |
| 5   | 6    | 0    | -2.458904               | 1.159757  | -0.030714 | 31 | 6 | 0 | -4.672324 | -2.613278 | -1.456374 |
| 6   | 6    | 0    | -3.519955               | 0.175278  | -0.002099 | 32 | 1 | 0 | -1.59106  | -2.657025 | 0.063685  |
| 7   | 6    | 0    | 0.552864                | -1.100221 | 0.018296  | 33 | 1 | 0 | -0.332268 | 1.427804  | -0.045342 |
| 8   | 6    | 0    | 1.748538                | -0.734742 | 0.01025   | 34 | 1 | 0 | -4.443204 | 3.886787  | -0.740742 |
| 9   | 6    | 0    | 3.121071                | -0.498927 | 0.006517  | 35 | 1 | 0 | -3.973403 | 2.572266  | -1.833244 |
| 10  | 6    | 0    | 3.872759                | -0.391486 | -1.209598 | 36 | 1 | 0 | -5.565539 | 2.363238  | 0.789175  |
| 11  | 6    | 0    | 5.220832                | -0.148074 | -1.2114   | 37 | 1 | 0 | -6.112259 | 1.974557  | -0.846848 |
| 12  | 6    | 0    | 5.96297                 | 0.01473   | -0.001153 | 38 | 1 | 0 | -6.684302 | 0.154398  | 0.809858  |
| 13  | 6    | 0    | 5.21716                 | -0.091348 | 1.21312   | 39 | 1 | 0 | -6.434375 | -0.480259 | -0.821352 |
| 14  | 6    | 0    | 3.869116                | -0.334786 | 1.218562  | 40 | 1 | 0 | -5.265346 | -1.541141 | 1.817391  |
| 15  | 6    | 0    | 7.348333                | 0.267907  | -0.004938 | 41 | 1 | 0 | -6.383033 | -2.366027 | 0.715998  |
| 16  | 7    | 0    | 8.500726                | 0.480835  | -0.008085 | 42 | 1 | 0 | -1.535029 | 3.145581  | -1.751482 |
| 17  | 9    | 0    | 3.204537                | -0.420062 | 2.393155  | 43 | 1 | 0 | -2.055831 | 4.548156  | -0.782298 |
| 18  | 9    | 0    | 5.868758                | 0.057154  | 2.382984  | 44 | 1 | 0 | -0.761949 | 3.499018  | -0.185765 |
| 19  | 9    | 0    | 3.211754                | -0.531695 | -2.380871 | 45 | 1 | 0 | -1.947717 | 3.032903  | 1.965736  |
| 20  | 9    | 0    | 5.876029                | -0.054403 | -2.384913 | 46 | 1 | 0 | -3.216849 | 4.189948  | 1.488262  |
| 21  | 6    | 0    | -2.791775               | 2.654399  | -0.017063 | 47 | 1 | 0 | -3.6487   | 2.54446   | 2.027983  |
| 22  | 6    | 0    | -4.122555               | 2.833906  | -0.772054 | 48 | 1 | 0 | -3.572684 | -3.386689 | 1.761716  |
| 23  | 6    | 0    | -5.227807               | 1.974574  | -0.188883 | 49 | 1 | 0 | -4.784034 | -4.257083 | 0.785356  |
| 24  | 7    | 0    | -4.823152               | 0.578024  | -0.00901  | 50 | 1 | 0 | -3.117796 | -4.122772 | 0.204143  |
| 25  | 6    | 0    | -5.946662               | -0.346221 | 0.161511  | 51 | 1 | 0 | -3.812521 | -3.079841 | -1.960146 |
|     |      |      |                         |           |           | 52 | 1 | 0 | -5.517496 | -3.320302 | -1.497767 |
|     |      |      |                         |           |           | 53 | 1 | 0 | -4.943412 | -1.719693 | -2.039913 |

**Table S22.** Cartesian coordinate for **IndCBZ-H** at the optimized geometry in  $S_0$  state using CAM-B3LYP/6-31+G(d,p) level of theory.

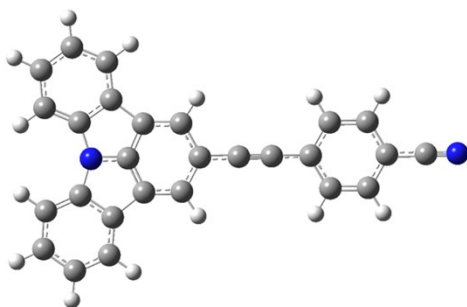

| No. | Atom | Type | Coordinates (Angstroms) |           |           |    |   |   |           |           |           |
|-----|------|------|-------------------------|-----------|-----------|----|---|---|-----------|-----------|-----------|
|     |      |      | X                       | Y         | Z         |    |   |   |           |           |           |
| 1   | 6    | 0    | 2.784041                | 2.156306  | 0.000016  | 21 | 6 | 0 | -3.079596 | 0.000041  | -0.000012 |
| 2   | 6    | 0    | 2.924271                | 3.538566  | 0.000001  | 22 | 6 | 0 | -4.505018 | 0.000027  | -0.000008 |
| 3   | 6    | 0    | 4.198723                | 4.093978  | 0         | 23 | 6 | 0 | -5.21698  | 1.208406  | -0.000108 |
| 4   | 6    | 0    | 5.333048                | 3.280596  | 0         | 24 | 6 | 0 | -6.600242 | 1.210081  | -0.000105 |
| 5   | 6    | 0    | 5.229655                | 1.893505  | 0.000001  | 25 | 6 | 0 | -7.300698 | -0.000001 | -0.000002 |
| 6   | 6    | 0    | 3.958589                | 1.341865  | 0.000016  | 26 | 6 | 0 | -6.600218 | -1.210069 | 0.000097  |
| 7   | 7    | 0    | 3.551268                | -0.000001 | 0.000037  | 27 | 6 | 0 | -5.216956 | -1.208367 | 0.000095  |
| 8   | 6    | 0    | 2.193766                | 0.000003  | 0.000004  | 28 | 6 | 0 | -8.735043 | -0.000014 | 0.000002  |
| 9   | 6    | 0    | 3.958562                | -1.341894 | 0.000006  | 29 | 7 | 0 | -9.891972 | -0.000034 | -0.000001 |
| 10  | 6    | 0    | 5.229617                | -1.893559 | -0.000016 | 30 | 1 | 0 | 2.046445  | 4.177229  | 0.000011  |
| 11  | 6    | 0    | 5.332982                | -3.280652 | -0.000046 | 31 | 1 | 0 | 4.313862  | 5.172805  | -0.000006 |
| 12  | 6    | 0    | 4.198641                | -4.094011 | -0.000051 | 32 | 1 | 0 | 6.317888  | 3.736629  | -0.000007 |
| 13  | 6    | 0    | 2.9242                  | -3.538573 | -0.000028 | 33 | 1 | 0 | 6.115285  | 1.267968  | 0.000012  |
| 14  | 6    | 0    | 2.783998                | -2.156311 | 0.000001  | 34 | 1 | 0 | 6.11526   | -1.26804  | -0.000012 |
| 15  | 6    | 0    | 1.622398                | -1.256996 | 0.000019  | 35 | 1 | 0 | 6.317813  | -3.736705 | -0.000064 |
| 16  | 6    | 0    | 0.232091                | -1.247511 | 0.000008  | 36 | 1 | 0 | 4.313759  | -5.17284  | -0.000075 |
| 17  | 6    | 0    | -0.441585               | 0.000003  | 0.000008  | 37 | 1 | 0 | 2.046361  | -4.17722  | -0.000033 |
| 18  | 6    | 0    | 0.232115                | 1.247557  | 0.000014  | 38 | 1 | 0 | -0.359693 | -2.156247 | -0.000007 |
| 19  | 6    | 0    | 1.622423                | 1.257014  | 0.000003  | 39 | 1 | 0 | -0.359651 | 2.156305  | 0.000004  |
| 20  | 6    | 0    | -1.870433               | 0.000045  | -0.000005 | 40 | 1 | 0 | -4.670912 | 2.144931  | -0.000186 |
|     |      |      |                         |           |           | 41 | 1 | 0 | -7.147386 | 2.146263  | -0.000182 |
|     |      |      |                         |           |           | 42 | 1 | 0 | -7.147343 | -2.146262 | 0.000177  |
|     |      |      |                         |           |           | 43 | 1 | 0 | -4.670869 | -2.144881 | 0.000172  |

**Table S23.** Cartesian coordinate for **IndCBZ-H** at the optimized geometry in  $S_1$  state using CAM-B3LYP/6-31G(d) level of theory.

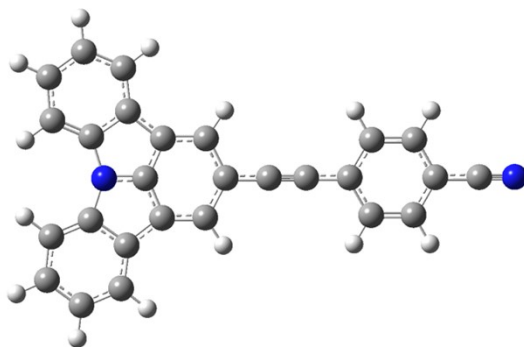

| No. | Atom | Type | Coordinates (Angstroms) |           |           | 21 | 6 | 0 | -3.074661 | -0.000599 | -0.000232 |
|-----|------|------|-------------------------|-----------|-----------|----|---|---|-----------|-----------|-----------|
|     |      |      | X                       | Y         | Z         |    |   |   |           |           |           |
| 1   | 6    | 0    | 2.761521                | 2.160672  | -0.000006 | 22 | 6 | 0 | -4.494034 | -0.00038  | -0.000121 |
| 2   | 6    | 0    | 2.927391                | 3.545627  | -0.000007 | 23 | 6 | 0 | -5.205168 | 1.210657  | -0.000069 |
| 3   | 6    | 0    | 4.216655                | 4.082678  | 0.000038  | 24 | 6 | 0 | -6.587545 | 1.211803  | 0.000028  |
| 4   | 6    | 0    | 5.348801                | 3.270092  | 0.000084  | 25 | 6 | 0 | -7.286549 | 0.000045  | 0.000074  |
| 5   | 6    | 0    | 5.220124                | 1.872763  | 0.000087  | 26 | 6 | 0 | -6.587913 | -1.211925 | 0.000021  |
| 6   | 6    | 0    | 3.94962                 | 1.345354  | 0.000042  | 27 | 6 | 0 | -5.205536 | -1.2112   | -0.000075 |
| 7   | 7    | 0    | 3.519505                | 0.00012   | 0.000033  | 28 | 6 | 0 | -8.720786 | 0.000263  | 0.000175  |
| 8   | 6    | 0    | 2.176923                | -0.000039 | -0.000017 | 29 | 7 | 0 | -9.877606 | 0.000434  | 0.000255  |
| 9   | 6    | 0    | 3.949938                | -1.345012 | 0.000042  | 30 | 1 | 0 | 2.063184  | 4.202163  | -0.000042 |
| 10  | 6    | 0    | 5.220567                | -1.872121 | 0.000088  | 31 | 1 | 0 | 4.337265  | 5.16151   | 0.000037  |
| 11  | 6    | 0    | 5.349574                | -3.26942  | 0.000086  | 32 | 1 | 0 | 6.337573  | 3.714911  | 0.000119  |
| 12  | 6    | 0    | 4.217619                | -4.082273 | 0.00004   | 33 | 1 | 0 | 6.097033  | 1.23455   | 0.000122  |
| 13  | 6    | 0    | 2.928229                | -3.545527 | -0.000005 | 34 | 1 | 0 | 6.097325  | -1.233701 | 0.000123  |
| 14  | 6    | 0    | 2.762032                | -2.16061  | -0.000005 | 35 | 1 | 0 | 6.338451  | -3.714005 | 0.000121  |
| 15  | 6    | 0    | 1.614807                | -1.280124 | -0.000044 | 36 | 1 | 0 | 4.338485  | -5.161077 | 0.000039  |
| 16  | 6    | 0    | 0.207656                | -1.273424 | -0.000104 | 37 | 1 | 0 | 2.064177  | -4.202267 | -0.000041 |
| 17  | 6    | 0    | -0.449517               | -0.000349 | -0.00013  | 38 | 1 | 0 | -0.394362 | -2.172746 | -0.000131 |
| 18  | 6    | 0    | 0.207356                | 1.272881  | -0.000104 | 39 | 1 | 0 | -0.394875 | 2.17206   | -0.000133 |
| 19  | 6    | 0    | 1.614504                | 1.279914  | -0.000044 | 40 | 1 | 0 | -4.657568 | 2.146163  | -0.000107 |
| 20  | 6    | 0    | -1.85981                | -0.000516 | -0.000197 | 41 | 1 | 0 | -7.135949 | 2.147073  | 0.000068  |
|     |      |      |                         |           |           | 42 | 1 | 0 | -7.1366   | -2.147028 | 0.000056  |
|     |      |      |                         |           |           | 43 | 1 | 0 | -4.65822  | -2.146872 | -0.000118 |



**Table S24.** Cartesian coordinate for **JLD-H** at the optimized geometry in  $S_0$  state using CAM-B3LYP/6-31G+(d,p) level of theory.

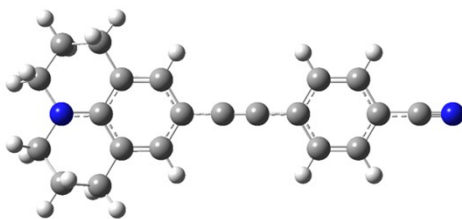

| No. | Atom | Type | Coordinates (Angstroms) |           |           | 20 | 6 | 0 | -4.699324 | 2.415835  | -0.518854 |
|-----|------|------|-------------------------|-----------|-----------|----|---|---|-----------|-----------|-----------|
|     |      |      | X                       | Y         | Z         |    |   |   |           |           |           |
| 1   | 6    | 0    | -2.630491               | 1.211391  | 0.12999   | 21 | 6 | 0 | -3.395566 | 2.502848  | 0.267871  |
| 2   | 6    | 0    | -1.248183               | 1.193742  | 0.112773  | 22 | 6 | 0 | 7.764248  | -0.000008 | 0.000086  |
| 3   | 6    | 0    | -0.525588               | 0.00001   | -0.000078 | 23 | 7 | 0 | 8.921365  | -0.000016 | 0.000126  |
| 4   | 6    | 0    | -1.24818                | -1.193728 | -0.112887 | 24 | 1 | 0 | -0.707763 | 2.131975  | 0.198598  |
| 5   | 6    | 0    | -2.630488               | -1.211388 | -0.13003  | 25 | 1 | 0 | -0.707757 | -2.131957 | -0.198746 |
| 6   | 6    | 0    | -3.346911               | -0.000002 | 0.000001  | 26 | 1 | 0 | 3.699748  | -2.134395 | -0.210136 |
| 7   | 6    | 0    | 0.897709                | 0.000015  | -0.00012  | 27 | 1 | 0 | 6.175687  | -2.135885 | -0.210115 |
| 8   | 6    | 0    | 2.108106                | 0.000016  | -0.000117 | 28 | 1 | 0 | 6.175691  | 2.135883  | 0.210175  |
| 9   | 6    | 0    | 3.531743                | 0.00001   | -0.000061 | 29 | 1 | 0 | 3.699752  | 2.134414  | 0.210023  |
| 10  | 6    | 0    | 4.245799                | -1.202335 | -0.118346 | 30 | 1 | 0 | -2.783503 | -3.340966 | 0.079456  |
| 11  | 6    | 0    | 5.628765                | -1.203961 | -0.118427 | 31 | 1 | 0 | -3.62558  | -2.699592 | -1.324287 |
| 12  | 6    | 0    | 6.330275                | -0.000002 | 0.000036  | 32 | 1 | 0 | -5.29544  | -3.326233 | 0.405097  |
| 13  | 6    | 0    | 5.628767                | 1.203963  | 0.11845   | 33 | 1 | 0 | -4.476664 | -2.299364 | 1.58545   |
| 14  | 6    | 0    | 4.245801                | 1.202349  | 0.118272  | 34 | 1 | 0 | -5.92202  | -1.434756 | -0.966386 |
| 15  | 6    | 0    | -3.395563               | -2.502849 | -0.267874 | 35 | 1 | 0 | -6.368038 | -1.061653 | 0.698438  |
| 16  | 6    | 0    | -4.699271               | -2.41585  | 0.518936  | 36 | 1 | 0 | -6.368095 | 1.061628  | -0.698239 |
| 17  | 6    | 0    | -5.509907               | -1.2242   | 0.033599  | 37 | 1 | 0 | -5.92196  | 1.43473   | 0.966553  |
| 18  | 7    | 0    | -4.727604               | -0.000008 | 0.000037  | 38 | 1 | 0 | -5.295493 | 3.326213  | -0.40498  |
| 19  | 6    | 0    | -5.509918               | 1.224179  | -0.033463 | 39 | 1 | 0 | -4.476785 | 2.299348  | -1.585383 |
|     |      |      |                         |           |           | 40 | 1 | 0 | -2.783534 | 3.340966  | -0.079505 |
|     |      |      |                         |           |           | 41 | 1 | 0 | -3.625517 | 2.699599  | 1.324297  |

**Table S25.** Cartesian coordinate for **JLD-H** at the optimized geometry in  $S_1$  state using CAM-B3LYP/6-31G(d) level of theory.

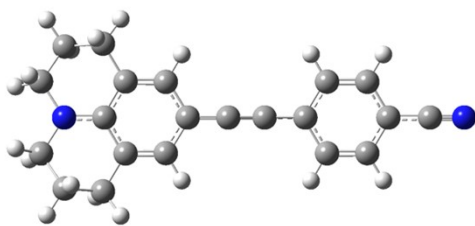

| No. | Atom | Type | Coordinates (Angstroms) |           |           | 20 | 6 | 0 | -4.69546  | 2.418612  | -0.519793 |
|-----|------|------|-------------------------|-----------|-----------|----|---|---|-----------|-----------|-----------|
|     |      |      | X                       | Y         | Z         |    |   |   |           |           |           |
| 1   | 6    | 0    | -2.619407               | 1.226141  | 0.125064  | 21 | 6 | 0 | -3.391078 | 2.512031  | 0.263869  |
| 2   | 6    | 0    | -1.249526               | 1.213046  | 0.110274  | 22 | 6 | 0 | 7.748333  | -0.00004  | -0.000201 |
| 3   | 6    | 0    | -0.504869               | 0.000036  | 0.000144  | 23 | 7 | 0 | 8.910993  | -0.000061 | -0.000303 |
| 4   | 6    | 0    | -1.24948                | -1.212996 | -0.110063 | 24 | 1 | 0 | -0.704039 | 2.147592  | 0.193226  |
| 5   | 6    | 0    | -2.61936                | -1.226129 | -0.125004 | 25 | 1 | 0 | -0.70396  | -2.147527 | -0.192953 |
| 6   | 6    | 0    | -3.34142                | -0.000003 | -0.00001  | 26 | 1 | 0 | 3.696411  | -2.15422  | -0.209749 |
| 7   | 6    | 0    | 0.877548                | 0.000054  | 0.000226  | 27 | 1 | 0 | 6.161027  | -2.145786 | -0.209342 |
| 8   | 6    | 0    | 2.116254                | 0.000064  | 0.000287  | 28 | 1 | 0 | 6.161142  | 2.145763  | 0.209217  |
| 9   | 6    | 0    | 3.502683                | 0.000038  | 0.000168  | 29 | 1 | 0 | 3.696527  | 2.154288  | 0.21005   |
| 10  | 6    | 0    | 4.241406                | -1.220594 | -0.118793 | 30 | 1 | 0 | -2.782073 | -3.351931 | 0.082256  |
| 11  | 6    | 0    | 5.611055                | -1.21503  | -0.118511 | 31 | 1 | 0 | -3.618343 | -2.702856 | -1.321909 |
| 12  | 6    | 0    | 6.329454                | -0.000014 | -0.000078 | 32 | 1 | 0 | -5.296292 | -3.325147 | 0.40282   |
| 13  | 6    | 0    | 5.61112                 | 1.215028  | 0.11848   | 33 | 1 | 0 | -4.479152 | -2.302467 | 1.587365  |
| 14  | 6    | 0    | 4.241471                | 1.220643  | 0.118999  | 34 | 1 | 0 | -5.891424 | -1.427335 | -0.981865 |
| 15  | 6    | 0    | -3.39098                | -2.51204  | -0.263891 | 35 | 1 | 0 | -6.364622 | -1.052355 | 0.675884  |
| 16  | 6    | 0    | -4.69545                | -2.418656 | 0.519629  | 36 | 1 | 0 | -6.364578 | 1.052265  | -0.676231 |
| 17  | 6    | 0    | -5.497599               | -1.22569  | 0.027032  | 37 | 1 | 0 | -5.89157  | 1.427258  | 0.98157   |
| 18  | 7    | 0    | -4.711759               | -0.000022 | -0.000083 | 38 | 1 | 0 | -5.29634  | 3.325087  | -0.403048 |
| 19  | 6    | 0    | -5.497629               | 1.225624  | -0.027284 | 39 | 1 | 0 | -4.479043 | 2.30243   | -1.587505 |
|     |      |      |                         |           |           | 40 | 1 | 0 | -2.782156 | 3.351939  | -0.082211 |
|     |      |      |                         |           |           | 41 | 1 | 0 | -3.618561 | 2.70284   | 1.321863  |

**Table S26.** Cartesian coordinate for **TMeJLD-H** at the optimized geometry in  $S_0$  state using CAM-B3LYP/6-31G+(d,p) level of theory.

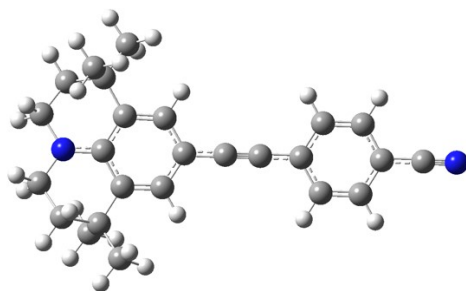

| No. | Atom | Type | Coordinates (Angstroms) |           |           | 26 | 6 | 0 | 2.090349  | 3.702359  | 0.606336  |
|-----|------|------|-------------------------|-----------|-----------|----|---|---|-----------|-----------|-----------|
|     |      |      | X                       | Y         | Z         |    |   |   |           |           |           |
| 1   | 6    | 0    | 2.098355                | 1.225789  | 0.010529  | 27 | 6 | 0 | 3.208234  | 2.90199   | -1.478259 |
| 2   | 6    | 0    | 0.715109                | 1.198723  | 0.01948   | 28 | 1 | 0 | 0.159448  | 2.128588  | 0.032491  |
| 3   | 6    | 0    | -0.004102               | -0.00001  | 0.000003  | 29 | 1 | 0 | 0.159464  | -2.128607 | -0.032484 |
| 4   | 6    | 0    | 0.715119                | -1.198739 | -0.019474 | 30 | 1 | 0 | -4.229966 | -2.144338 | -0.040923 |
| 5   | 6    | 0    | 2.098365                | -1.225793 | -0.010524 | 31 | 1 | 0 | -6.705833 | -2.145806 | -0.040911 |
| 6   | 6    | 0    | 2.812862                | 0.000001  | 0         | 32 | 1 | 0 | -6.705821 | 2.145797  | 0.040905  |
| 7   | 6    | 0    | -1.427691               | -0.000016 | 0.000002  | 33 | 1 | 0 | -4.229954 | 2.144315  | 0.040922  |
| 8   | 6    | 0    | -2.638178               | -0.000016 | 0.000003  | 34 | 1 | 0 | 3.877282  | -2.123836 | -1.837922 |
| 9   | 6    | 0    | -4.06178                | -0.000012 | 0.000001  | 35 | 1 | 0 | 4.758753  | -3.243762 | -0.79842  |
| 10  | 6    | 0    | -4.77597                | -1.207906 | -0.023021 | 36 | 1 | 0 | 5.501186  | -1.494348 | 0.670452  |
| 11  | 6    | 0    | -6.158927               | -1.209537 | -0.023055 | 37 | 1 | 0 | 5.776617  | -0.929909 | -0.972221 |
| 12  | 6    | 0    | -6.860492               | -0.000005 | -0.000003 | 38 | 1 | 0 | 5.776659  | 0.929963  | 0.972112  |
| 13  | 6    | 0    | -6.158921               | 1.209524  | 0.023051  | 39 | 1 | 0 | 5.501115  | 1.494367  | -0.670554 |
| 14  | 6    | 0    | -4.775964               | 1.207886  | 0.023021  | 40 | 1 | 0 | 4.758745  | 3.243784  | 0.798367  |
| 15  | 6    | 0    | 2.870148                | -2.541273 | 0.020005  | 41 | 1 | 0 | 3.877323  | 2.123845  | 1.837897  |
| 16  | 6    | 0    | 4.152889                | -2.330937 | -0.797296 | 42 | 1 | 0 | 1.763011  | -3.462668 | -1.622797 |
| 17  | 6    | 0    | 4.986684                | -1.187698 | -0.252883 | 43 | 1 | 0 | 2.7283    | -4.591207 | -0.654967 |
| 18  | 7    | 0    | 4.194644                | 0.000002  | 0.000007  | 44 | 1 | 0 | 1.208413  | -3.971995 | -0.018715 |
| 19  | 6    | 0    | 4.986676                | 1.187722  | 0.25282   | 45 | 1 | 0 | 2.291387  | -3.102527 | 2.040438  |
| 20  | 6    | 0    | 4.15289                 | 2.330952  | 0.797263  | 46 | 1 | 0 | 3.838     | -3.798636 | 1.521743  |
| 21  | 6    | 0    | 2.870118                | 2.541281  | -0.019992 | 47 | 1 | 0 | 3.732664  | -2.090056 | 1.989563  |
| 22  | 6    | 0    | -8.294438               | -0.000001 | -0.000005 | 48 | 1 | 0 | 1.763023  | 3.462612  | 1.622874  |
| 23  | 7    | 0    | -9.451559               | 0.000009  | -0.000006 | 49 | 1 | 0 | 2.72824   | 4.591197  | 0.655027  |
| 24  | 6    | 0    | 2.090386                | -3.702386 | -0.606268 | 50 | 1 | 0 | 1.208343  | 3.971957  | 0.018825  |
| 25  | 6    | 0    | 3.208325                | -2.901938 | 1.478269  | 51 | 1 | 0 | 2.291271  | 3.102576  | -2.04039  |
|     |      |      |                         |           |           | 52 | 1 | 0 | 3.83789   | 3.798702  | -1.521733 |
|     |      |      |                         |           |           | 53 | 1 | 0 | 3.73257   | 2.090133  | -1.989595 |

**Table S27.** Cartesian coordinate for TMeJLD-H at the optimized geometry in S<sub>1</sub> state using CAM-B3LYP/6-31G(d) level of theory.

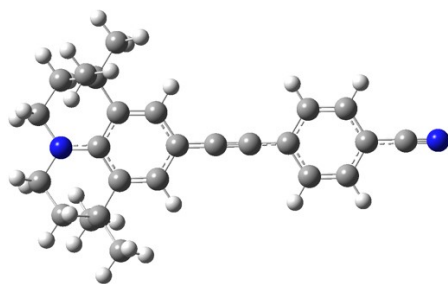

| No. | Atom | Type | Coordinates (Angstroms) |           |           | 26 | 6 | 0 | 2.090918  | 3.715186  | 0.609343  |
|-----|------|------|-------------------------|-----------|-----------|----|---|---|-----------|-----------|-----------|
|     |      |      | X                       | Y         | Z         |    |   |   |           |           |           |
| 1   | 6    | 0    | 2.088967                | 1.240526  | 0.014069  | 27 | 6 | 0 | 3.193268  | 2.909705  | -1.482654 |
| 2   | 6    | 0    | 0.718505                | 1.217392  | 0.020746  | 28 | 1 | 0 | 0.157768  | 2.143326  | 0.032589  |
| 3   | 6    | 0    | -0.023052               | 0.000052  | 0.000134  | 29 | 1 | 0 | 0.157667  | -2.143231 | -0.03233  |
| 4   | 6    | 0    | 0.718448                | -1.217323 | -0.02055  | 30 | 1 | 0 | -4.224947 | -2.163665 | -0.059173 |
| 5   | 6    | 0    | 2.088909                | -1.240519 | -0.014017 | 31 | 1 | 0 | -6.6894   | -2.155131 | -0.059459 |
| 6   | 6    | 0    | 2.809666                | -0.000013 | -0.000012 | 32 | 1 | 0 | -6.689515 | 2.155134  | 0.059348  |
| 7   | 6    | 0    | -1.405555               | 0.000083  | 0.000213  | 33 | 1 | 0 | -4.225063 | 2.16379   | 0.059463  |
| 8   | 6    | 0    | -2.644461               | 0.000102  | 0.000278  | 34 | 1 | 0 | 3.882491  | -2.134622 | -1.833642 |
| 9   | 6    | 0    | -4.030724               | 0.000067  | 0.000161  | 35 | 1 | 0 | 4.761268  | -3.246395 | -0.784137 |
| 10  | 6    | 0    | -4.769858               | -1.2259   | -0.033453 | 36 | 1 | 0 | 5.478198  | -1.484723 | 0.689943  |
| 11  | 6    | 0    | -6.139403               | -1.220297 | -0.033669 | 37 | 1 | 0 | 5.772753  | -0.926002 | -0.951523 |
| 12  | 6    | 0    | -6.858083               | -0.000002 | -0.000071 | 38 | 1 | 0 | 5.772894  | 0.925841  | 0.951191  |
| 13  | 6    | 0    | -6.139468               | 1.220328  | 0.033644  | 39 | 1 | 0 | 5.478193  | 1.484577  | -0.690244 |
| 14  | 6    | 0    | -4.769924               | 1.225998  | 0.033651  | 40 | 1 | 0 | 4.761497  | 3.24628   | 0.783914  |
| 15  | 6    | 0    | 2.864944                | -2.552468 | 0.020662  | 41 | 1 | 0 | 3.882779  | 2.134545  | 1.833509  |
| 16  | 6    | 0    | 4.150299                | -2.337477 | -0.790202 | 42 | 1 | 0 | 1.767297  | -3.476734 | -1.627057 |
| 17  | 6    | 0    | 4.975973                | -1.190924 | -0.243497 | 43 | 1 | 0 | 2.731649  | -4.601736 | -0.653806 |
| 18  | 7    | 0    | 4.180256                | -0.000044 | -0.000083 | 44 | 1 | 0 | 1.207383  | -3.986337 | -0.025244 |
| 19  | 6    | 0    | 4.976052                | 1.190799  | 0.243249  | 45 | 1 | 0 | 2.272189  | -3.110355 | 2.037037  |
| 20  | 6    | 0    | 4.150488                | 2.337389  | 0.790041  | 46 | 1 | 0 | 3.821964  | -3.806396 | 1.529738  |
| 21  | 6    | 0    | 2.865058                | 2.55244   | -0.020687 | 47 | 1 | 0 | 3.713951  | -2.099197 | 2.000397  |
| 22  | 6    | 0    | -8.276809               | -0.000035 | -0.000185 | 48 | 1 | 0 | 1.767624  | 3.47675   | 1.627149  |
| 23  | 7    | 0    | -9.439523               | -0.000065 | -0.000277 | 49 | 1 | 0 | 2.731925  | 4.601712  | 0.653801  |
| 24  | 6    | 0    | 2.090686                | -3.715181 | -0.609284 | 50 | 1 | 0 | 1.207565  | 3.986384  | 0.025397  |
| 25  | 6    | 0    | 3.193292                | -2.909743 | 1.482595  | 51 | 1 | 0 | 2.272116  | 3.11036   | -2.036998 |
|     |      |      |                         |           |           | 52 | 1 | 0 | 3.821976  | 3.806329  | -1.52986  |
|     |      |      |                         |           |           | 53 | 1 | 0 | 3.713835  | 2.099136  | -2.000514 |

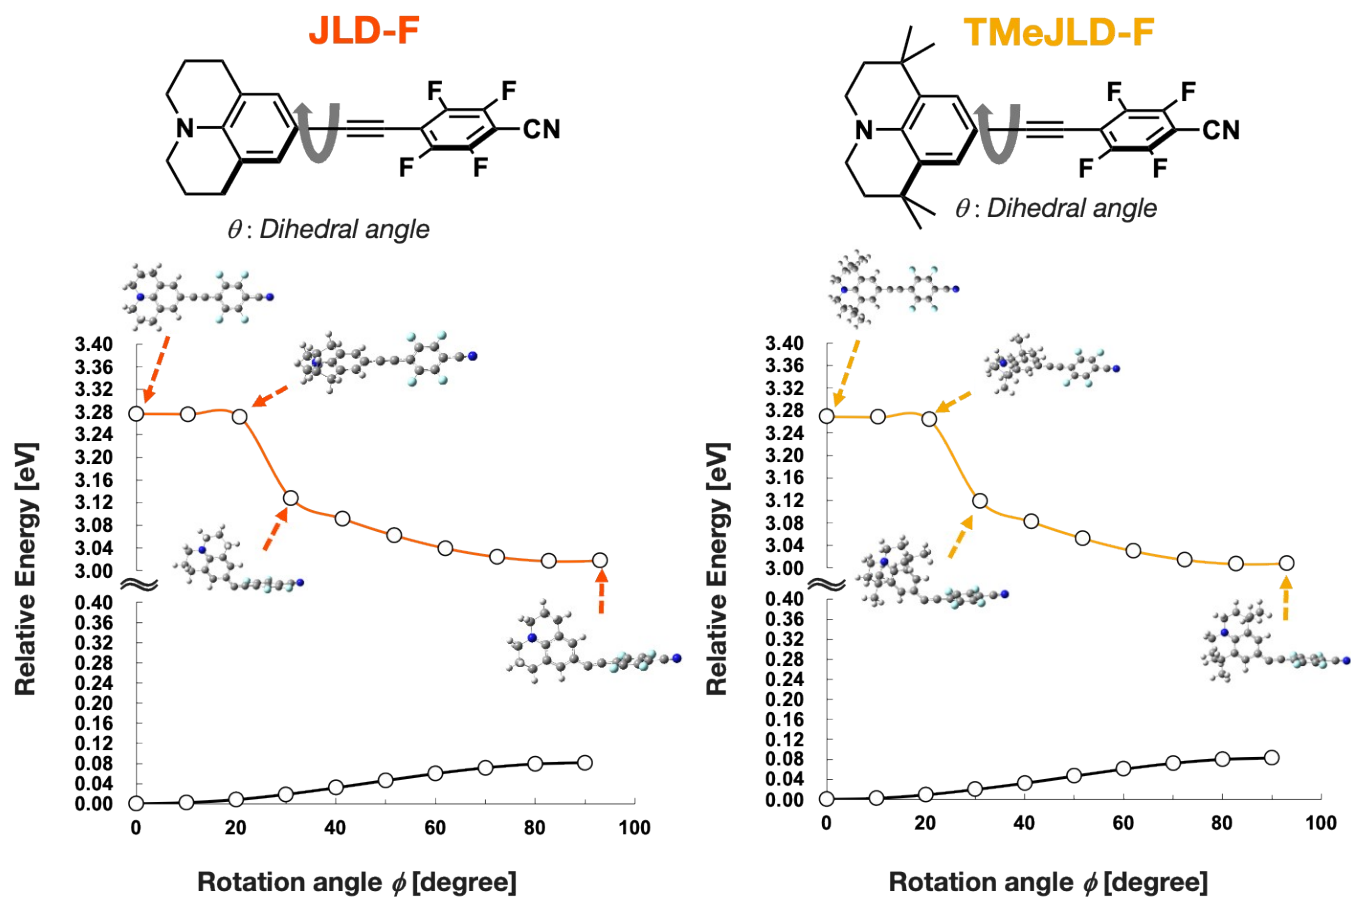

**Figure S16.** The energy profile of (a) JLD-F and (b) TMeJLD-F in  $S_0$  and  $S_1$ . These are gained by performing constrained structural optimization using (TD)-DFT at the CAMB3LYP/6-31G+(d,p)//CAM-B3LYP/6-31G+(d,p) level.

**Table S28.**  $S_1$ - $S_0$  Excitation energies and oscillator strength for JLD-F and TMeJLD-F.

| compound | functional | basis set   | excitation energy |                     |
|----------|------------|-------------|-------------------|---------------------|
|          |            |             | [nm]              | oscillator strength |
| JLD-F    | CAM-B3LYP  | 6-31G(d)    | 602               | 0.002               |
|          | CAM-B3LYP  | 6-31+G(d,p) | 600               | 0.001               |
|          | B3LYP      | 6-31+G(d,p) | 745               | 0.000               |
|          | B3LYP      | cc-PVDZ     | 771               | 0.000               |
| TMeJLD-F | CAM-B3LYP  | 6-31G(d)    | 605               | 0.000               |
|          | CAM-B3LYP  | 6-31+G(d,p) | 603               | 0.001               |
|          | B3LYP      | 6-31+G(d,p) | 772               | 0.000               |
|          | B3LYP      | cc-PVDZ     | 743               | 0.000               |

## Photophysical Characteristics

UV-vis absorption spectra were recorded using a JASCO V-530 and V-750 absorption spectrometer (JASCO, Japan). PL spectra of the solution was measured using a Rf-6000 (Shimadzu, Japan). Photoluminescence quantum yields were measured using Quantaaurus-QY C11347-01 series (Hamamatsu Photonics, Japan). PL lifetime was measured using a Quantaaurus-Tau fluorescence lifetime spectrometer C11367-34 (Hamamatsu Photonics, Japan).

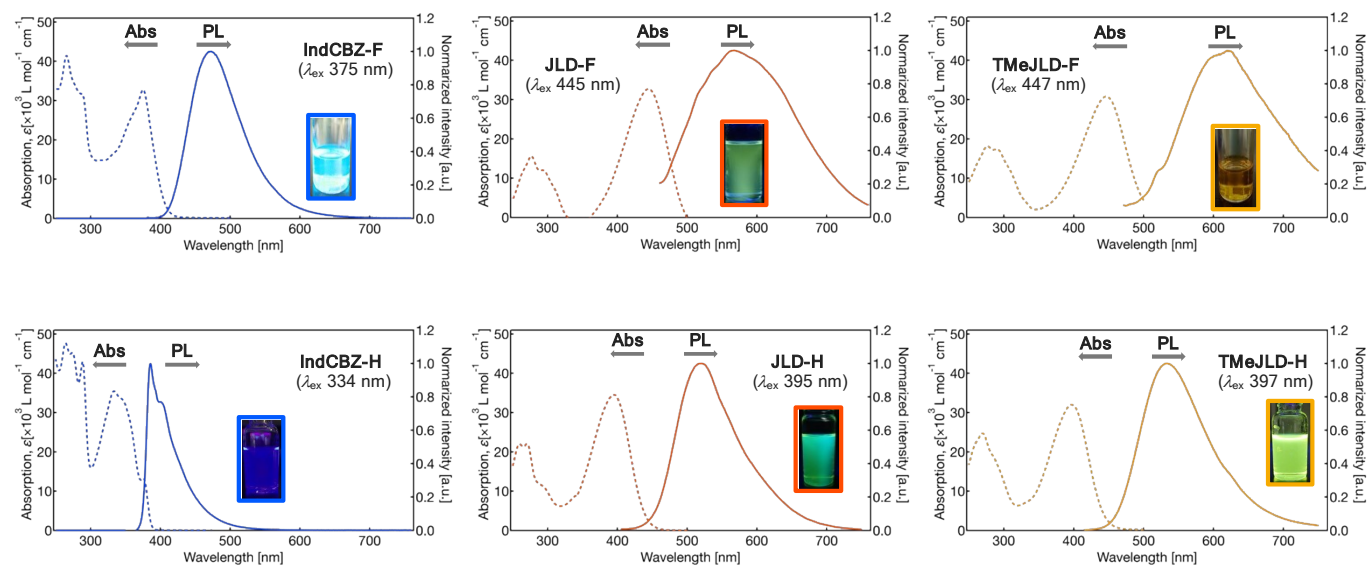

**Figure S17.** UV-vis and PL spectra of all derivatives in dichloromethane. Concentration:  $1.0 \times 10^{-5}$  mol L<sup>-1</sup> for UV-vis and PL.

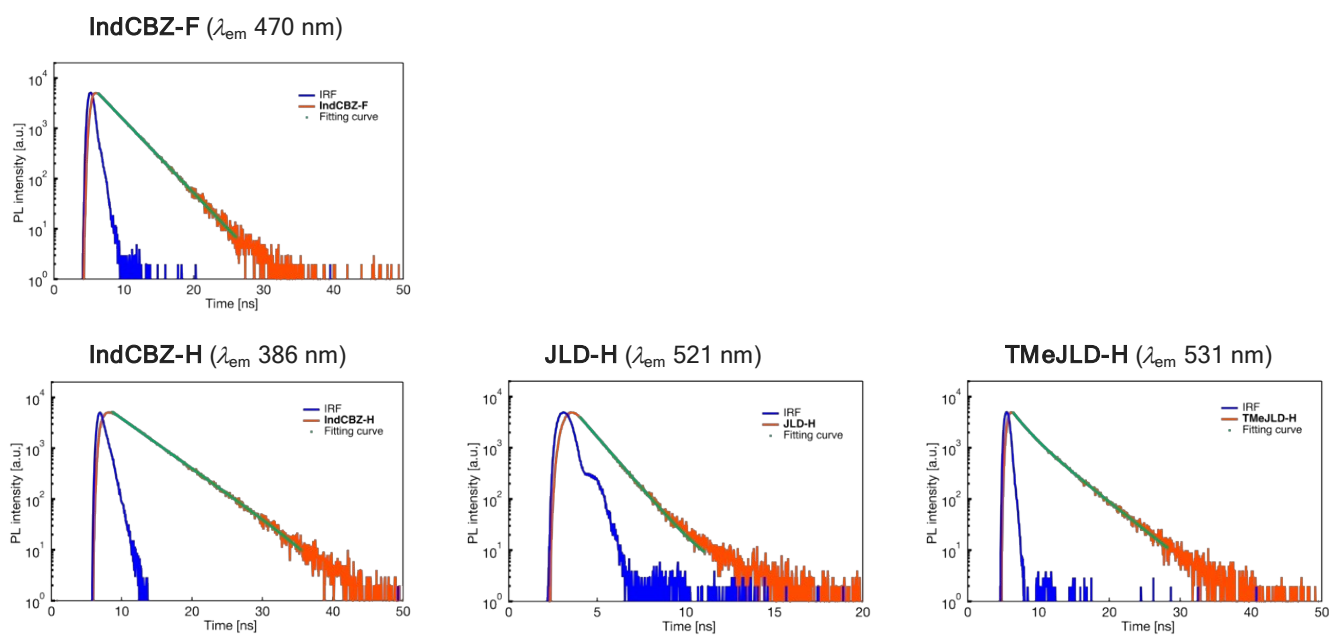

**Figure S18.** Transient photoluminescence decay curves of IndCBZ-F, IndCBZ-H, JLD-H and TMeJLD-H in dichloromethane.

**Table S29.** Photophysical properties of synthetic derivatives in dichloromethane.

| compound        | $\lambda_{\text{abs}} (\varepsilon)$<br>[nm] | $\lambda_{\text{em}}^{[a]} (\Phi_{\text{em}}^{[b]})$<br>[nm] | $\tau$<br>[ns] | $k_r$<br>[ $10^7 \text{ s}^{-1}$ ] | $k_{\text{nr}}$<br>[ $10^7 \text{ s}^{-1}$ ] |
|-----------------|----------------------------------------------|--------------------------------------------------------------|----------------|------------------------------------|----------------------------------------------|
| <b>IndCBZ-F</b> | 375 (31.5)                                   | 470 (0.96)                                                   | 2.99           | 32.1                               | 1.34                                         |
| <b>IndCBZ-H</b> | 334 (34.0)                                   | 386 (0.54)                                                   | 4.42           | 12.2                               | 10.4                                         |
| <b>JLD-F</b>    | 445 (32.7)                                   | 568 (0.01>)                                                  | -              | -                                  | -                                            |
| <b>JLD-H</b>    | 395 (34.5)                                   | 521 (0.07)                                                   | 1.08           | 6.48                               | 86.1                                         |
| <b>TMeJLD-F</b> | 447 (31.1)                                   | 627 (0.01>)                                                  | -              | -                                  | -                                            |
| <b>TMeJLD-H</b> | 397 (32.0)                                   | 531 (0.18)                                                   | 3.24           | 5.56                               | 25.3                                         |

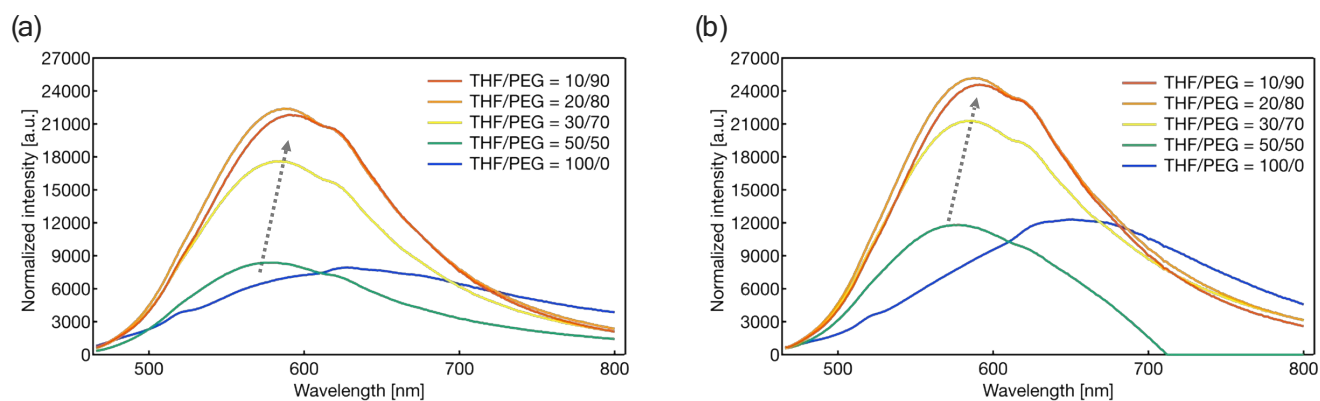

**Figure S19.** Emission spectra of (a) **JLD-F** and (b) **TMeJLD-F** in  $10^{-5}$  mol/L THF and PEG 400 mixed solution. Excited wavelength was 450nm.

**Table S30.** Photophysical properties of **JLD-F** in THF and PEG 400 mixed solution

| PEG ratio [%] | PL intensity [a.u.] | $\lambda_{\text{max}}$ [nm] | $\Phi_{\text{em}}$ |
|---------------|---------------------|-----------------------------|--------------------|
| 0             | 7937                | 628                         | <0.01              |
| 50            | 8377                | 576                         | <0.01              |
| 70            | 17622               | 585                         | <0.01              |
| 80            | 22401               | 591                         | <0.01              |
| 90            | 21825               | 591                         | <0.01              |

**Table S31.** Photophysical properties of **TMeJLD-F** in THF and PEG 400 mixed solution

| PEG ratio [%] | PL intensity [a.u.] | $\lambda_{\text{max}}$ [nm] | $\Phi_{\text{em}}$ |
|---------------|---------------------|-----------------------------|--------------------|
| 0             | 12316               | 651                         | <0.01              |
| 50            | 11808               | 578                         | <0.01              |
| 70            | 21288               | 586                         | <0.01              |
| 80            | 25176               | 588                         | <0.01              |
| 90            | 24563               | 591                         | <0.01              |

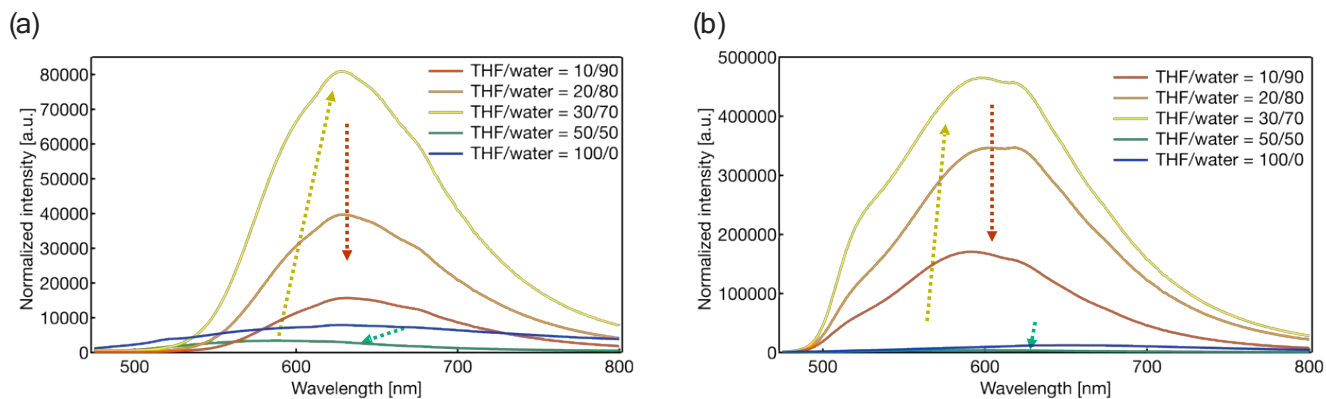

**Figure S20.** Emission spectra of (a) **JLD-F** and (b) **TMeJLD-F** in  $10^{-5}$  mol/L THF and water mixed solution. Excited wavelength was 450nm.

**Table S32.** Photophysical properties of **JLD-F** in THF and water mixed solution.

| Water ratio [%] | PL intensity [a.u.] | $\lambda_{\max}$ [nm] | $\Phi_{\text{em}}$ |
|-----------------|---------------------|-----------------------|--------------------|
| 0               | 7937                | 628                   | <0.01              |
| 50              | 3433                | 588                   | <0.01              |
| 70              | 80894               | 628                   | 0.04               |
| 80              | 39701               | 628                   | 0.03               |
| 90              | 15696               | 632                   | 0.03               |

**Table S33.** Photophysical properties of **TMeJLD-F** in THF and water mixed solution.

| Water ratio [%] | PL intensity [a.u.] | $\lambda_{\max}$ [nm] | $\Phi_{\text{em}}$ |
|-----------------|---------------------|-----------------------|--------------------|
| 0               | 12316               | 651                   | <0.01              |
| 50              | 3884                | 590                   | <0.01              |
| 70              | 465015              | 597                   | 0.12               |
| 80              | 346916              | 619                   | 0.09               |
| 90              | 170794              | 591                   |                    |



### Lippert-Mataga Plot <sup>[3]</sup>

$$\Delta\nu = \frac{2(\mu_e - \mu_g)^2}{hca^3} \left( \frac{\varepsilon - 1}{2\varepsilon + 1} - \frac{n^2 - 1}{2n^2 + 1} \right) = \frac{2(\mu_e - \mu_g)^2}{hca^3} \Delta f + \text{const.}$$

Where  $h$  is the Plank's constant,  $c$  is the velocity of light, and  $a_0$  is Onsager cavity radius. The solvent parameters  $\varepsilon$  and  $n$  are solvent dielectric constant and refraction index, respectively. The Onsager radius ( $a_0 = 6.00 \text{ \AA}$  for **IndCBZ-F**,  $5.74 \text{ \AA}$  for **JLD-F** and  $5.86 \text{ \AA}$  for **TMeJLD-F**) was calculated from DFT optimization.

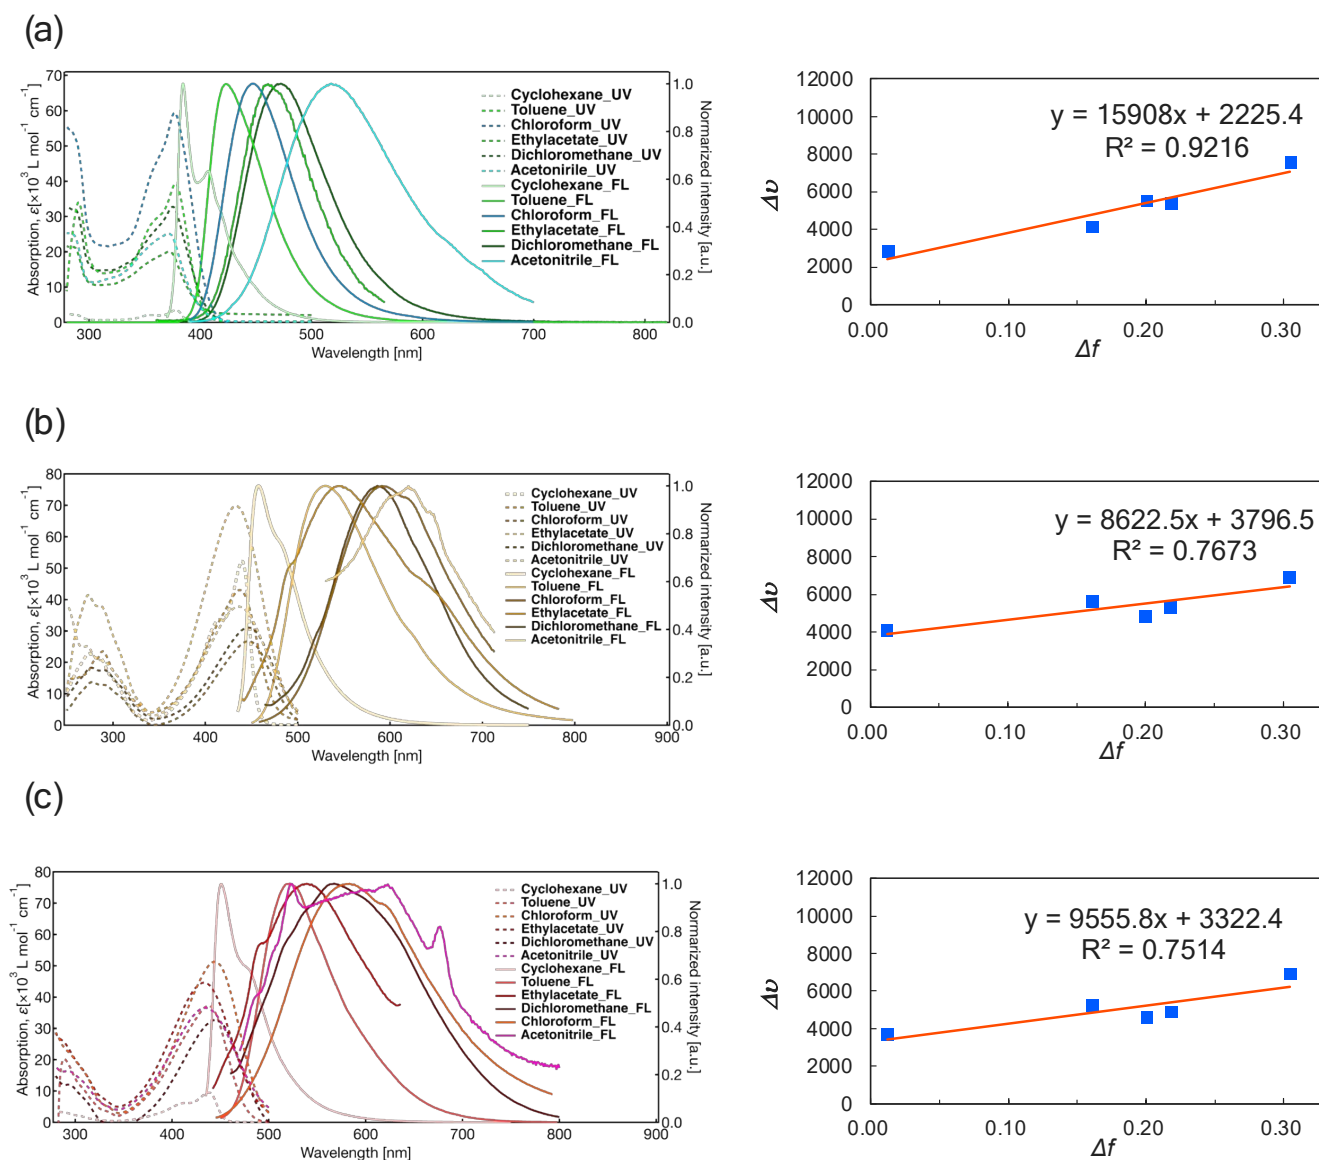

**Figure S21.** UV-vis absorption and fluorescence spectra in various solvents and Lippert-Mataga Plot of (a) **IndCBZ-F**, (b) **JLD-F** and (c) **TMeJLD-F**. Excited at the longest absorption maxima. Lippert-Mataga plot was created excluding values in cyclohexane or hexane.

**Table S34.** Photophysical properties of **IndCBZ-F** in various solvents.

| Solvent         | $\lambda_{\text{abs}}$ [nm] | $\lambda_{\text{em}}$ [nm] | $\Phi_{\text{PL}}$ | $\Delta f$ | $\Delta\nu$ [ $\text{cm}^{-1}$ ] |
|-----------------|-----------------------------|----------------------------|--------------------|------------|----------------------------------|
| Cyclohexane     | 378                         | 385                        | 0.80               | 0.0004     | 481                              |
| Toluene         | 378                         | 423                        | 0.96               | 0.012      | 2814                             |
| Chloroform      | 377                         | 446                        | 0.83               | 0.161      | 4245                             |
| Ethyl acetate   | 372                         | 468                        | 0.73               | 0.201      | 5514                             |
| Dichloromethane | 375                         | 470                        | 0.96               | 0.219      | 5390                             |
| Acetonitrile    | 372                         | 518                        | 0.47               | 0.305      | 7362                             |

**Table S35.** Photophysical properties of **JLD-F** in various solvents.

| Solvent         | $\lambda_{\text{abs}}$ [nm] | $\lambda_{\text{em}}$ [nm] | $\Phi_{\text{PL}}$ | $\Delta f$ | $\Delta\nu$ [ $\text{cm}^{-1}$ ] |
|-----------------|-----------------------------|----------------------------|--------------------|------------|----------------------------------|
| Cyclohexane     | 438                         | 451                        | 0.49               | 0.0004     | 658                              |
| Toluene         | 438                         | 522                        | 0.13               | 0.012      | 3674                             |
| Chloroform      | 447                         | 583                        | 0.06               | 0.161      | 5574                             |
| Ethyl acetate   | 433                         | 539                        | <0.01              | 0.201      | 4542                             |
| Dichloromethane | 445                         | 568                        | <0.01              | 0.219      | 4866                             |
| Acetonitrile    | 436                         | 623                        | <0.01              | 0.305      | 6990                             |

**Table S36.** Photophysical properties of **TMeJLD-F** in various solvents.

| Solvent         | $\lambda_{\text{abs}}$ [nm] | $\lambda_{\text{em}}$ [nm] | $\Phi_{\text{PL}}$ | $\Delta f$ | $\Delta\nu$ [ $\text{cm}^{-1}$ ] |
|-----------------|-----------------------------|----------------------------|--------------------|------------|----------------------------------|
| Cyclohexane     | 440                         | 458                        | 0.38               | 0.0004     | 893                              |
| Toluene         | 437                         | 531                        | 0.24               | 0.012      | 4051                             |
| Chloroform      | 444                         | 591                        |                    | 0.161      | 5807                             |
| Ethyl acetate   | 433                         | 548                        | <0.01              | 0.201      | 4847                             |
| Dichloromethane | 447                         | 586                        | <0.01              | 0.219      | 5307                             |
| Acetonitrile    | 434                         | 620                        | <0.01              | 0.305      | 6598                             |

## PMMA film

Thin films of synthetic derivatives were prepared using Opticoat MS-B100 spin coater (MIKASA, Japan). The solutions of PMMA (100 mg) in  $\text{CHCl}_3$  (3 mL) containing varying amounts of derivatives in the range from 1.0 weight per weight were prepared. Then, the thoroughly cleaned glass slide was mounted and clamped on the top rotating plate of a spin coater. Few drops of a solution of PMMA in  $\text{CHCl}_3$  containing calculated amounts of derivatives were placed on the glass slide and the top plate of spin coater kept rotating at the speed of 500 revolutions per minute (rpm) for 5 seconds, then at 750 rpm for an additional 5 seconds, and finally at 1200 rpm for 10 seconds. The solvent evaporates and a thin smooth film was seen deposited on a glass slide. The prepared films were used for photophysical measurements without further drying the solvent.

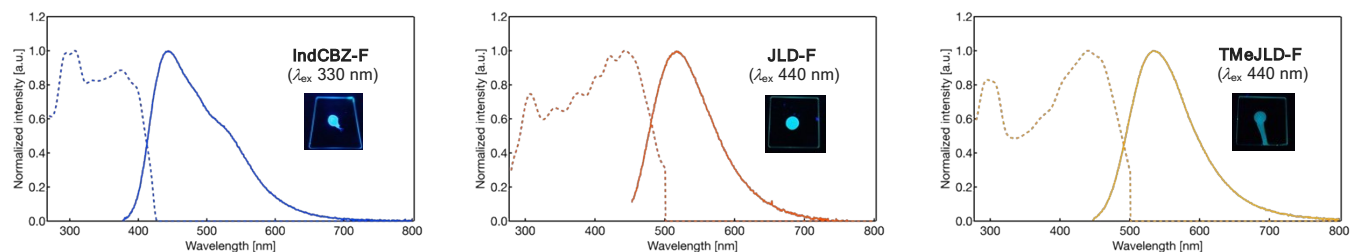

**Figure S22.** PL spectra of **IndCBZ-F**, **JLD-F** and **TMeJLD-F** in PMMA film 1wt%.

**Figure S23.** Transient photoluminescence decay curves of **IndCBZ-F**, **JLD-F** and **TMeJLD-F** in PMMA film

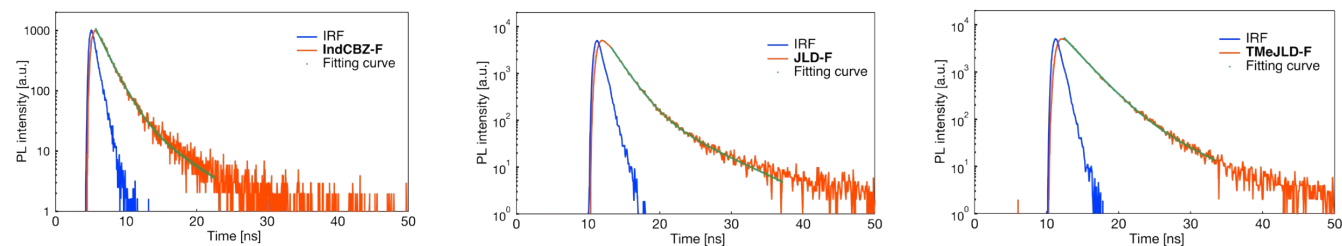

1wt%.

**Table S37.** Photophysical properties of **IndCBZ-F**, **JLD-F** and **TMeJLD-F** in PMMA film 1wt%.

| compound        | $\lambda_{em} (\Phi_{em})$<br>[nm] | $\tau$<br>[ns] | $k_r$<br>[ $10^7 \text{s}^{-1}$ ] | $k_{nr}$<br>[ $10^7 \text{s}^{-1}$ ] |
|-----------------|------------------------------------|----------------|-----------------------------------|--------------------------------------|
| <b>IndCBZ-F</b> | 447 (1.0)                          | 2.43           | 2.58                              | 0.45                                 |
| <b>JLD-F</b>    | 517 (0.54)                         | 2.26           | 23.9                              | 20.4                                 |
| <b>TMeJLD-F</b> | 534 (0.66)                         | 3.73           | 17.7                              | 9.12                                 |

$\lambda_{ex}$ : 330 nm for **IndCBZ-F**, 440 nm for **JLD-F** and **TMeJLD-F**.

## Solid-states

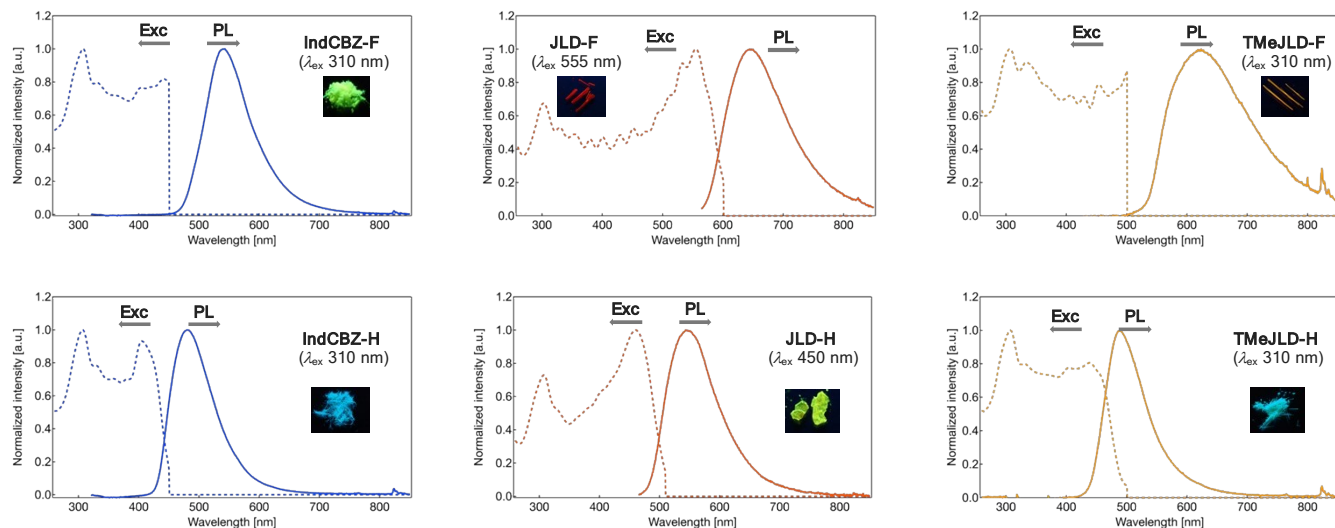

**Figure S24.** Excitation and PL spectra of all derivatives in the solid states. Excitation spectra were obtained by monitoring PL at the maximum PL wavelength.

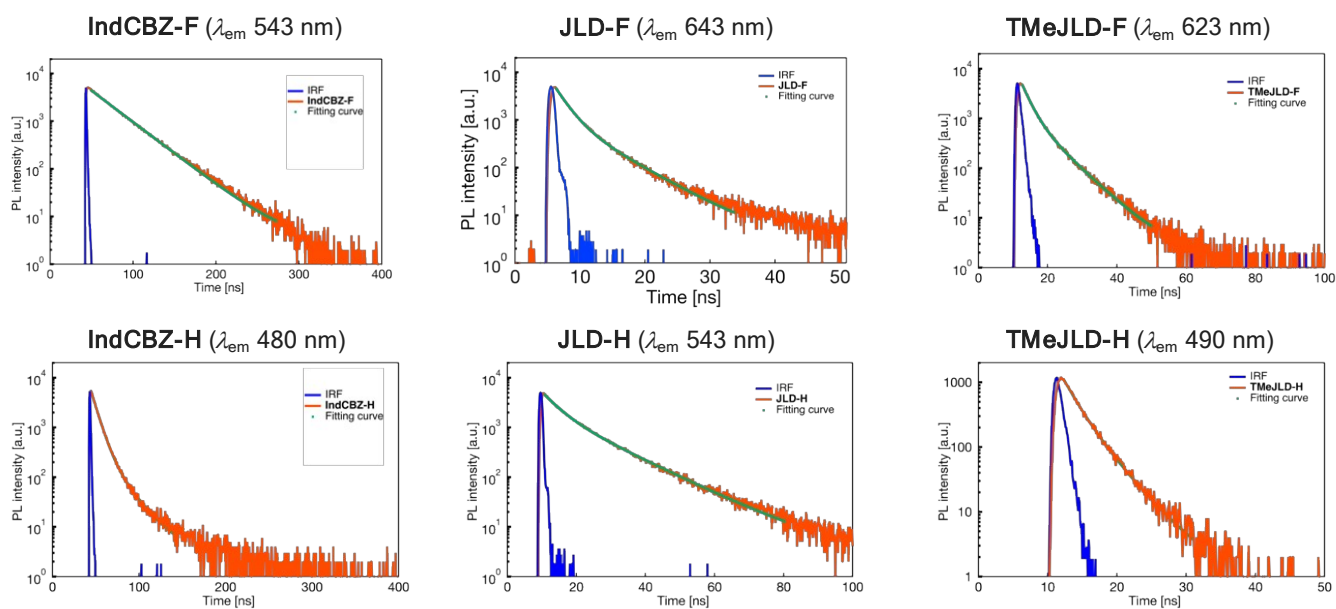

**Figure S25.** Transient photoluminescence decay curves of all derivatives in crystalline state.

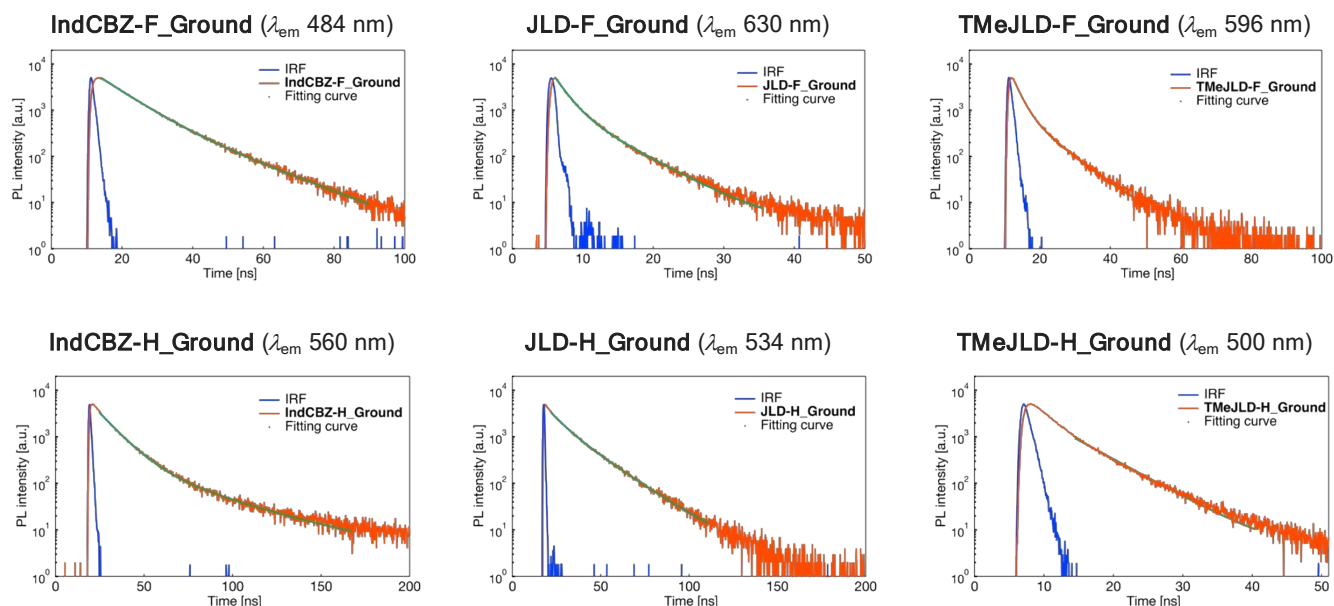

**Figure S26.** Transient photoluminescence decay curves of all ground sample.

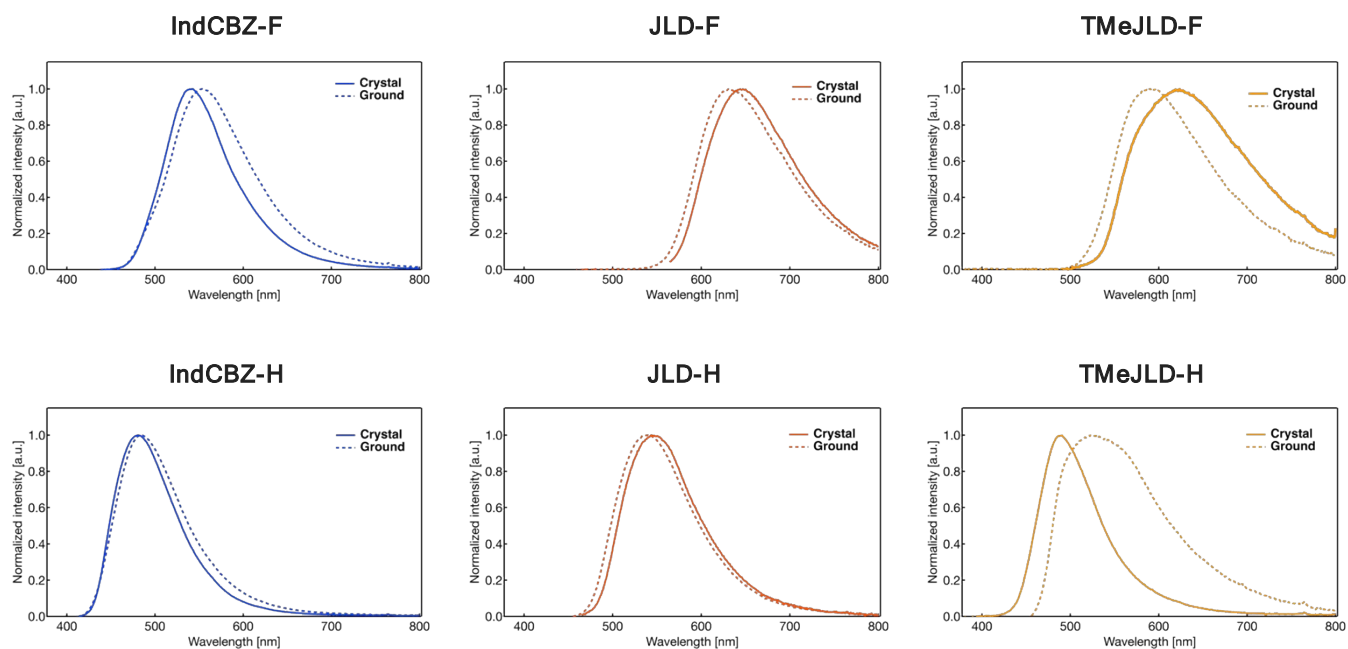

**Figure S27.** Fluorescence spectra of all derivatives (Crystal and Ground).

**Table S38.** Photophysical properties of derivatives in solid state.

| compound                 | $\lambda_{em} (\Phi_{em})$ |                   | $\tau$        |               |        | $k_r$ | $k_{nr}$ | $\chi^2$ |       |
|--------------------------|----------------------------|-------------------|---------------|---------------|--------|-------|----------|----------|-------|
|                          | [nm]                       | $\tau_{AVE}$ [ns] | $\tau_1$ [ns] | $\tau_2$ [ns] | $A_1$  |       |          |          | $A_2$ |
| <b>IndCBZ-F</b>          | 543 (0.85)                 | 33.0              | –             | –             |        | 2.58  | 0.45     | 1.57     |       |
| <b>JLD-F</b>             | 643 (0.08)                 | 2.51              | 1.79          | 5.67          | 2337.7 | 192.3 | 3.19     | 36.7     | 1.35  |
| <b>TMeJLD-F</b>          | 623 (0.20)                 | 3.15              | 2.32          | 6.76          | 347.4  | 78.6  | 6.35     | 25.4     | 1.15  |
| <b>IndCBZ-H</b>          | 480 (0.37)                 | 8.02              | 7.00          | 20.3          | 361.3  | 233.0 | 4.61     | 7.86     | 1.21  |
| <b>JLD-H</b>             | 543 (0.18)                 | 7.79              | 4.34          | 13.1          | 677.5  | 155.8 | 2.31     | 10.5     | 1.15  |
| <b>TMeJLD-H</b>          | 490 (0.22)                 | 2.44              | 1.86          | 3.74          | 110.6  | 50.0  | 9.02     | 32.0     | 1.10  |
| <b>IndCBZ-F (ground)</b> | 553 (0.40)                 | 9.21              | 7.78          | 16.2          | 439.6  | 89.4  | 4.34     | 6.51     | 1.00  |
| <b>JLD-F (ground)</b>    | 630 (0.20)                 | 2.20              | 1.69          | 5.29          | 413.4  | 95.7  | 9.09     | 36.4     | 1.27  |
| <b>TMeJLD-F (ground)</b> | 596 (0.25)                 | 2.95              | 2.16          | 7.34          | 766.8  | 139.1 | 8.47     | 25.4     | 1.21  |
| <b>IndCBZ-H (ground)</b> | 484 (0.71)                 | 11.9              | 10.1          | 36.6          | 757.1  | 53.8  | 5.97     | 2.44     | 1.24  |
| <b>JLD-H (ground)</b>    | 543 (0.25)                 | 11.8              | 6.83          | 17.3          | 530.9  | 484.3 | 2.12     | 6.35     | 1.19  |
| <b>TMeJLD-H (ground)</b> | 523 (0.21)                 | 3.80              | 2.93          | 6.68          | 216.7  | 65.4  | 5.53     | 20.8     | 1.11  |

$\lambda_{ex}$ : 310 nm for **IndCBZ-F**, **IndCBZ-H**, **TMeJLD-F** and **TMeJLD-H**, 450 nm for **JLD-H**, 555 nm for **JLD-F**.  
Amplitude average lifetime  $\tau_{AVE} = \Sigma A_i \tau_i / \Sigma A_i$ <sup>[4]</sup>.

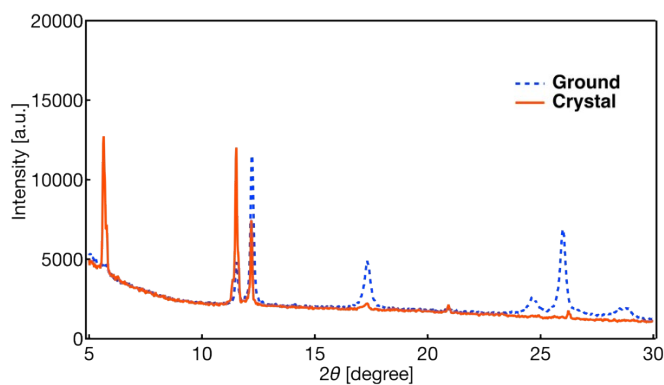**Figure S28.** PXRD pattern of **JLD-F** (Crystal and Ground).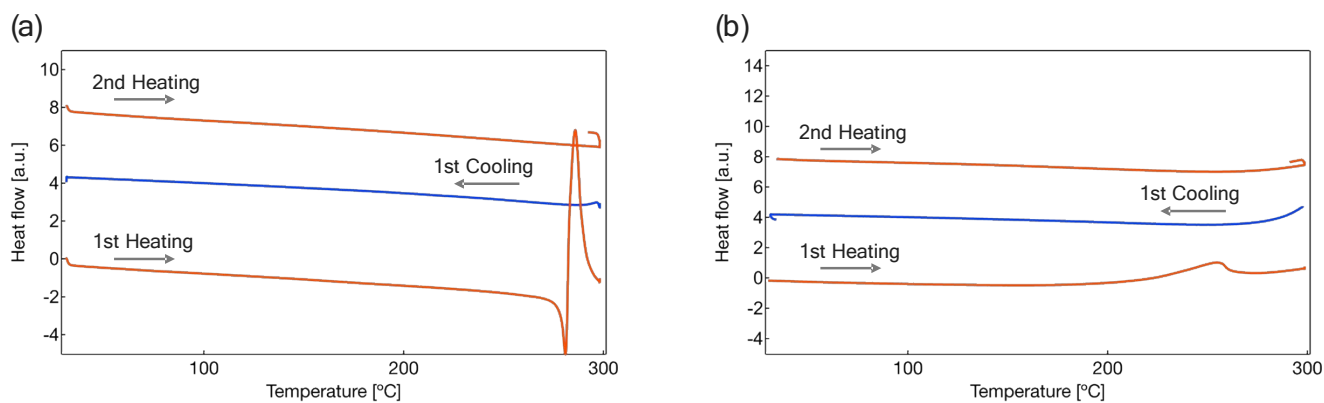**Figure S29.** DSC curve of **JLD-F** ( (a). Crystal and (b). Ground).

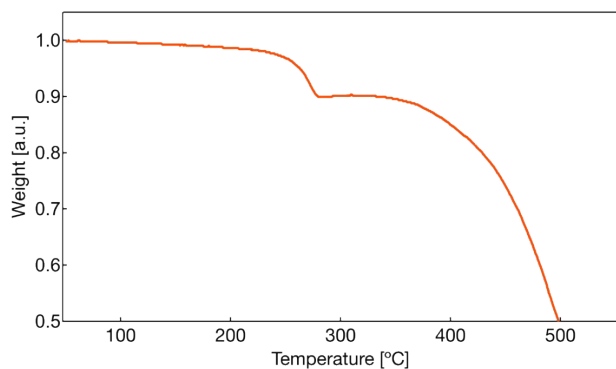

**Figure S30.** DSC curve of **JLD-F**.

## References

- [1]. M. J. Frisch, G. W. Trucks, H. B. Schlegel, G. E. Scuseria, M. A. Robb, J. R. Cheeseman, G. Scalmani, V. Barone, G. A. Petersson, H. Nakatsuji, X. Li, M. Caricato, A. V. Marenich, J. Bloino, B. G. Janesko, R. Gomperts, B. Mennucci, H. P. Hratchian, J. V. Ortiz, A. F. Izmaylov, J. L. Sonnenberg, D. Williams-Young, F. Ding, F. Lipparini, F. Egidi, J. Goings, B. Peng, A. Petrone, T. Henderson, D. Ranasinghe, V. G. Zakrzewski, J. Gao, N. Rega, G. Zheng, W. Liang, M. Hada, M. Ehara, K. Toyota, R. Fukuda, J. Hasegawa, M. Ishida, T. Nakajima, Y. Honda, O. Kitao, H. Nakai, T. Vreven, K. Throssell, J. A. Montgomery, Jr., J. E. Peralta, F. Ogliaro, M. J. Bearpark, J. J. Heyd, E. N. Brothers, K. N. Kudin, V. N. Staroverov, T. A. Keith, R. Kobayashi, J. Normand, K. Raghavachari, A. P. Rendell, J. C. Burant, S. S. Iyengar, J. Tomasi, M. Cossi, J. M. Millam, M. Klene, C. Adamo, R. Cammi, J. W. Ochterski, R. L. Martin, K. Morokuma, O. Farkas, J. B. Foresman and D. J. Fox, Gaussian 16, Revision B. 01; Gaussian, Inc., Wallingford, CT, USA, 2016.
- [2]. a) T. Yanai, D. P. Tew, N. C. Handy, *Chem. Phys. Lett.* **2004**, *393*, 51–57; b) M. Li, J. R. Reimers, M. J. Ford, R. Kobayashi, R. D. Amos, *J. Comput. Chem.* **2021**, *42*, 1486–1497; c) B. P. Pritchard, D. Altarawy, B. Didier, T. D. Gibson, T. L. Windus. *J. Chem. Inf. Model.* **2019**, *59*, 4814-4820.
- [3]. a) E. Lippert, *Z. Naturforsch.* **1955**, *10*, 541–546; b) N. Mataga, Y. Kaifu, M. Koizumi, *Bull. Chem. Soc. Jpn.* **1955**, *28*, 690–691; c) N. Mataga, Y. Kaifu, M. Koizumi, *Bull. Chem. Soc. Jpn.* **1956**, *29*, 465–470. d) M. E. Vázquez, J. B. Blanco, B. Imperiali, *J. Am. Chem. Soc.* **2005**, *127*, 1300; e) M. Ravi, A. Samanta, T. Radhakrishnan, *J. Phys. Chem.* **1994**, *98*, 9133; f) H. Yao, T. Okada, N. Mataga, *J. Phys. Chem.* **1989**, *93*, 738.
- [4]. a) A. Sillen, Y. Engelborghs, *Photochem. photobiol.* **1998**, *67*, 475-486. b) A. Saini, K.R. J. Thomas, *RSC Adv.*, **2016**, *6*, 71638-71651.
